# Supplementary material for: Discovery of Novel 4-Hydroxyquinazoline Derivatives: In Silico, In Vivo and In Vitro Studies Using Primary PARPi-Resistant Cell Lines
Source: MDPI journal article supplement (doi:10.3390/molecules29061407), 2024-03-21

# Supporting Information

|                                                                                                           |                    |
|-----------------------------------------------------------------------------------------------------------|--------------------|
| <b>S1: TableS1, TableS2, TableS3</b>                                                                      | <b>..... 1-7</b>   |
| <b>S2: The Synthesis method of Compounds Y1-Y5</b>                                                        | <b>..... 8-9</b>   |
| <b>S3: The Synthesis method of Compounds IN17, IN17-(1-5)</b>                                             | <b>..... 10-14</b> |
| <b>S4: <math>^1\text{H}</math>-NMR and <math>^{13}\text{C}</math>-NMR Spectral of synthetic compounds</b> |                    |
| <b>.....15-67</b>                                                                                         |                    |
| <b>S5: Mass Spectral of synthetic compounds</b>                                                           | <b>..... 68-95</b> |
| <b>S6: IR Spectral of compound B1</b>                                                                     | <b>..... 96</b>    |



**S1: Table S1, TableS2, TableS3**

**Table S1. The inhibition rate of in-house compounds *in vitro*.**

| No. | MF                        | MW     | SMILES                                                                                             | Purity | Inhibition rate (%) |         | Inhibition rate (%) |
|-----|---------------------------|--------|----------------------------------------------------------------------------------------------------|--------|---------------------|---------|---------------------|
|     |                           |        |                                                                                                    |        | (50μM) <sup>a</sup> |         | (0.5μM)             |
|     |                           |        |                                                                                                    |        | HCT-15              | HCC1937 | PARP1               |
| 1   | C7H6N2OS                  | 166.2  | NC1=NC2=CC=C(O)C=C2S1                                                                              | >95%   | 13.7                | 12.7    |                     |
| 2   | C16H18FN3O3               | 319.33 | OC(C1=CN(CC)C2=CC(N3C<br>CNCC3)=C(F)C=C2C1=O)=O                                                    | >95%   | 31.9                | 10.3    |                     |
| 3   | C19H22FN3O4               | 375.39 | OC(C1=CN(C2CC2)C3=C(OC<br>)C(N4CC(C)NCC4)=C(F)C=C<br>3C1=O)=O                                      | >95%   | 52.3                | 19.5    |                     |
| 4   | C13H10F4N2O2              | 302.22 | CC(N1CC2=C(F)C=CC=C2C(<br>F)(F)F)=CC(NC1=O)=O                                                      | >95%   | 48.9                | 16.5    |                     |
| 5   | C17H13N3O5S2              | 403.43 | OC(C1=CC=CC=C1C(NC2=C<br>C=C(S(=O)(NC3=NC=CS3)=<br>O)C=C2)=O)=O                                    | >95%   | 40.5                | 18.1    |                     |
| 6   | C18H14ClFN4O4             | 404.77 | FC(C=C1)=C(Cl)C=C1NC2=<br>NC=NC3=C2C=C([N+])([O-])<br>=O)C(O[C@H]4COCC4)=C3                        | >95%   | 69.7                | 44.1    |                     |
| 7   | C26H19Cl3F3N3<br>O4S      | 632.86 | O=C(NC1=CC=C(Cl)C(C(F)(<br>F)F)=C1)C2=CC3=C(N4CCN(<br>S(=O)(C5=C(Cl)C=CC=C5Cl)<br>=O)CC4)C=CC=C3O2 | >95%   | 10                  | 6.5     |                     |
| 8   | C13H5F2NO2                | 245.18 | O=C(C1=C(F)C=CC(F)=C12)<br>C3=C(C=NC=C3)C2=O                                                       | >95%   | 51.4                | 54.9    | 9.1                 |
| 9   | C16H15F6N5O*H<br>2O*H3O4P | 523.32 | FC1=CC(C[C@H])(CC(N2CC<br>N3C(C2)=NN=C3C(F)(F)F)=<br>O)N)=C(F)C=C1F                                | >95%   | 29.2                | 22.4    |                     |
| 10  | C10H10N2O                 | 174.19 | CC(C1)=NN(C2=CC=CC=C2)<br>C1=O                                                                     | >95%   | 26.9                | 15.7    |                     |
| 11  | C26H20Cl2N4O4<br>S        | 555.43 | O=C(NC1=CC(C#N)=CC=C1)<br>C2=CC3=C(N4CCN(S(=O)(C<br>5=C(Cl)C=CC=C5Cl)=O)CC4<br>)C=CC=C3O2          | >95%   | 11.9                | 8.4     |                     |
| 12  | C26H19Cl3F3N3<br>O4S      | 632.86 | O=C(NC1=CC=C(Cl)C(C(F)(<br>F)F)=C1)C2=CC3=C(N4CCN(<br>S(=O)(C5=C(Cl)C=CC=C5Cl)<br>=O)CC4)C=CC=C3O2 | >95%   | 8.2                 | 11.1    |                     |
| 13  | C28H36ClN5O3S             | 558.13 | ClC(C=N1)=C(NC2=C(S(=O)(<br>C(C)C)=O)C=CC=C2)N=C1N<br>C3=C(OC(C)C)C=C(C4CCNC<br>C4)C(C)=C3         | >95%   | 52.8                | 42.8    | 11.1                |
| 14  | C11H15ClN4O               | 254.72 | ClC1=NC2=C(NC([C@H](<br>CC)N2C(C)C)=O)C=N1                                                         | >95%   | 39                  | 14.1    |                     |

|    |                            |        |                                                                                                             |      |      |      |      |
|----|----------------------------|--------|-------------------------------------------------------------------------------------------------------------|------|------|------|------|
| 15 | C23H16F2N2O4               | 422.39 | O=C(NC1=CC(C(OC)=O)=CC=C1)C2=CC3=C(NC4=CC=C(F)C(F)=C4)C=CC=C3O2                                             | >95% | 21   | 1.2  |      |
| 16 | C24H20ClN5O2               | 445.9  | N#CC1=C(NC2=CC=C(OCC3=NC=CC=C3)C(Cl)=C2)C4=C(C(N)=C(OCC)C=C4N=C1                                            | >95% | 52.1 | 66.6 | 5.7  |
| 17 | C20H19F2N5O2               | 399.4  | O=C1NC(CN2CCN(C(NC3=C(C=C(F)C=C3F)=O)CC2)=NC4=CC=CC=C41                                                     | >95% | 63.3 | 60.6 | 53.1 |
| 18 | C20H24O5S                  | 376.46 | CC(C1=CC=C(C(COS(=O)(C2=CC=C(C(C)=O)C=C1)(C)C(OC)=O                                                         | >95% | 41.1 | 32   |      |
| 19 | C15H14ClN3O4S              | 367.8  | O=C(N[C@H]1[C@](S(=O)(=O)C2(C(=O)O)([H])N2C1=O)[C@H](N)C3=CC=CC=C3                                          | >95% | 46.9 | 8.9  |      |
| 20 | C16H18N3NaO4S              | 371.38 | O=C1NC(CN2CCN(C(NC3=C(C=C(F)C=C3F)=O)CC2)=NC4=CC=CC=C41                                                     | >95% | 50.4 | 6.5  |      |
| 21 | C14H8FNO2Se                | 320.19 | O=C1N(C(C2=CC=CC=C2F)=O)[Se]C3=CC=CC=C31                                                                    | >95% | 15.6 | 2.3  |      |
| 22 | C26H28Cl2N4O4              | 531.43 | CC(N1CCN(C2=CC=C(OC[C@@H]3O[C@@](CN4C=CN=C4)(C5=CC=C(Cl)C=C5Cl)OC3)C=C2)CC1)=O                              | >95% | 16.8 | 51.5 | 9.7  |
| 23 | C10H14N2O                  | 178.23 | OC1=CC=C(N2CCNCC2)C=C1                                                                                      | >95% | 41.9 | 9.2  |      |
| 24 | C5H5N3O                    | 123.11 | O=C(C1=NC=CN=C1)N                                                                                           | >95% | 23.1 | 15.7 |      |
| 25 | C16H13Cl3N2OS              | 387.71 | ClC1=CC=C(C(OCC2=C(Cl)S=C2)CN3C=CN=C3)C(Cl)=C1                                                              | >95% | 43.2 | 58.6 |      |
| 26 | C12H12N2O2S                | 248.3  | O=S(C1=CC=C(N)C=C1)(C2=CC=C(N)C=C2)=O                                                                       | >95% | 14.6 | 22.2 |      |
| 27 | C22H19N4NaO8S <sub>2</sub> | 554.52 | O=C1N(C(C([O-])=O)=C2C[N+](=O)C=C(C(N)=O)C=C3)[C@H](SC2)[C@@H]1NC([C@H](S(=O)([O-])=O)C4=CC=C(C=C4)=O.[Na+] | >95% | 27   | 20.3 |      |
| 28 | C13H12F2N6O                | 306.27 | OC(CN1C=NC=N1)(CN2C=NC=N2)C3=C(F)C=C(F)C=C3                                                                 | >95% | 40.5 | 4.6  |      |
| 29 | C24H35Cl2N3O4              | 500.45 | O=C(NC1=C(C)C=CC=C1C)CN2CCN(CC(O)COC3=CC=C(C=C3OC)CC2.[H]Cl.[H]Cl                                           | >95% | 33.4 | 25.4 |      |
| 30 | C14H9NO2Se                 | 302.2  | O=C(C1=CC=CC=C1)OC2=N[Se]C3=CC=CC=C32                                                                       | >95% | 12.4 | 5.4  |      |

|    |               |         |                                                                                                             |      |      |      |      |
|----|---------------|---------|-------------------------------------------------------------------------------------------------------------|------|------|------|------|
| 31 | C35H38Cl2N8O4 | 705.63  | O=C1N(C(C)CC)N=CN1C2=CC=C(N3CCN(C4=CC=C(OC[C@H]5O[C@@](CN6N=CN=C6)(C7=CC=C(Cl)C=C7Cl)OC5)C=C4)CC3)C=C2      | >95% | 50.4 | 51.1 | 7.8  |
| 32 | C22H19ClO3    | 366.83  | O=C1C([C@H]2CC[C@H](C3=CC=C(Cl)C=C3)CC2)=C(O)C(C4=C1C=CC=C4)=O                                              | >95% | 47.3 | 50.8 | 39.2 |
| 33 | C11H13BrN2O5  | 333.13, | OC[C@@H]1[C@H](C[C@H](N2C(NC(C(/C=C/Br)=C2)=O)=O)O1)O                                                       | >95% | 28.5 | 17.3 |      |
| 34 | C11H16N4O5    | 284.26  | O=C(C1=CC=C(C)C(NC(N)=N)=C1)OCC.O[N+](=[O-])=O                                                              | >95% | 35.3 | 31.9 |      |
| 35 | C24H34O5      | 402.52  | O=C(C[C@@](CC1=O)([H])[C@](C)(CC1)[C@@]2([H])C3=O)[C@@]2([H])[C@@](C[C@]4([H])[C@H](C)CCC(O)=O)([H])[C@]34C | >95% | 12.3 | 21.4 |      |
| 36 | C16H17N7O2S   | 371.41  | N#CCC1(N2N=CC(C3=C4C(NC=C4)=NC=N3)=C2)CN(S(=O)(CC)=O)C1                                                     | >95% | 46.6 | 64.6 | 12.7 |
| 37 | C24H29N7O2    | 447.53  | O=C1C(C(C)=O)=C(C)C2=C(N=C(NC3=NC=C(N4CCNCC4)C=C3)N=C2N1C5CCCC5                                             | >95% | 49.7 | 52.4 | 45.6 |
| 38 | C17H14N4O2    | 306.31  | O=C(O)C1=CC=C(C)C(NC2=NC=CC(C3=CC=CN=C3)=N2)=C1                                                             | >95% | 22.4 | 22.4 |      |
| 39 | C21H20FN3O6S  | 461.46  | O=C(C1=C(SC2C)N2C3=C(C=C(F)C(N4CCN(CC5=C(C)OC(O5)=O)CC4)=C3)C1=O)O                                          | >95% | 15.7 | 15.7 |      |
| 40 | C7H8N2O3S     | 200.21  | O=C(C(N12)=CCS[C@]2([H])[C@H](N)C1=O)O                                                                      | >95% | 13.8 | 13.8 |      |
| 41 | C16H12O6      | 300.26  | O=C1C=C(C2=CC=C(OC)C(O)=C2)OC3=CC(O)=CC(O)=C13                                                              | >95% | 30.5 | 30.5 |      |
| 42 | C16H12O6      | 300.26  | O=C1C=C(C2=CC=C(O)C(O)=C2)OC3=CC(OC)=CC(O)=C13                                                              | >95% | 1.6  | 1.6  |      |
| 43 | C16H12O5      | 284.26  | O=C1C=C(C2=CC=C(O)C=C2)                                                                                     | >95% | 33.5 | 31.5 |      |

|    |               |        |                          |      |      |      |
|----|---------------|--------|--------------------------|------|------|------|
|    |               |        | 2)OC3=CC(OC)=CC(O)=C13   |      |      |      |
|    |               |        | CCCC1=NC2=CC(C3=NC4=     |      |      |      |
| 44 | C19H20N4      | 304.38 | CC=CC=C4N3C)=CC(C)=C2    | >95% | 47.5 | 43.2 |
|    |               |        | N1                       |      |      |      |
| 45 | C10H12N2O2    | 192.21 | O=C1N(C2=CC=C(N)C=C2)C   | >95% | 33.6 | 24.4 |
|    |               |        | COC1                     |      |      |      |
| 46 | C11H9NO3      | 203.19 | O=C1N(C[C@@H]2OC2)C(C    | >95% | 22.1 | 38.5 |
|    |               |        | 3=C1C=CC=C3)=O           |      |      |      |
|    |               |        | O=C1N(C[C@H](O)CNC2=C    |      |      |      |
| 47 | C21H21N3O5    | 395.4  | C=C(N3C(COCC3)=O)C=C2)   | >95% | 31.2 | 46.9 |
|    |               |        | C(C4=C1C=CC=C4)=O        |      |      |      |
| 48 | C10H10BrNO    | 240.1  | O=C1NC2=CC=CC=C2CCC1     | >95% | 35.8 | 22.3 |
|    |               |        | Br                       |      |      |      |
| 49 | C8H15ClN4O    | 218.68 | CCCC1=NN(C)C(C(N)=O)=C   | >95% | 34.8 | 29   |
|    |               |        | 1N,Cl                    |      |      |      |
| 50 | C15H17N5O2    | 299.33 | CC(C)(C)C(OCN1C=CC2=C(   | >95% | 33.6 | 44.7 |
|    |               |        | C3=CCN=C3)N=CN=C21)=O    |      |      |      |
|    |               |        | C[C@]1([C@](CC2)([H]))C@ |      |      |      |
| 51 | C18H22O2      | 270.36 | ]3([H])CCC4=C(C=CC(O)=C4 | >95% | 65.8 | 59.3 |
|    |               |        | )[C@@]3([H])CC1)C2=O     |      |      | 1.5  |
| 52 | C16H8FNO2     | 265.24 | N#CC1=CC(C=C2OC(C3=C2    | >95% | 46.2 | 41.5 |
|    |               |        | C=CC=C3)=O)=CC=C1F       |      |      |      |
|    |               |        | O=C(C1=C(C2=CC=CC=C2C    |      |      |      |
| 53 | C18H22N4O     | 310.39 | )C=C(N3CCN(C)CC3)N=C1)   | >95% | 16.5 | 49.6 |
|    |               |        | N                        |      |      |      |
|    |               |        | O=S(C1=CC=C(N2N=C(C(F)(  |      |      |      |
| 54 | C17H14F3N3O2S | 381.37 | F)F)C=C2C3=CC=C(C)C=C3)  | >95% | 33.5 | 33.1 |
|    |               |        | C=C1)(N)=O               |      |      |      |
|    |               |        | O=C(N1C[C@H](C(CBr)=O)[  |      |      |      |
| 55 | C16H20BrNO3   | 354.24 | C@H](CC)C1)OCC2=CC=CC    | >95% | 52.7 | 43.2 |
|    |               |        | =C2                      |      |      | 13.5 |
|    |               |        | O=C(OC(C)(C)C)NC1=CN=C   |      |      |      |
| 56 | C18H20N4O4S   | 388.44 | (N(S(=O)(C2=CC=C(C)C=C2) | >95% | 37.5 | 53.2 |
|    |               |        | =O)C=C3)C3=N1            |      |      |      |
|    |               |        | O=C1N(CC(F)(F)F)[C@H](C) |      |      |      |
| 57 | C14H18ClF3N2O | 322.75 | [C@H](C2=CC=CC=C2)C[C    | >95% | 44.4 | 35.2 |
|    |               |        | @@H]1N,[H]Cl             |      |      |      |
|    |               |        | O=C(C1=CN=C2C(C[C@@]3    |      |      |      |
| 58 | C15H11N3O3    | 281.26 | (C4=CC=CN=C4NC3=O)C2)=   | >95% | 42.8 | 36   |
|    |               |        | C1)O                     |      |      |      |
|    |               |        | O=C1[C@H](C2=CC=CC(F)=   |      |      |      |
| 59 | C25H33F2NO2Si | 445.61 | C2F)CC[C@@H](O[Si](C(C)  | >95% | 48.2 | 46.5 |
|    |               |        | C)(C(C)C)C(C)C3=NC=CC    |      |      |      |
|    |               |        | =C31                     |      |      |      |

|    |                                                                  |        |                                                 |      |      |      |      |
|----|------------------------------------------------------------------|--------|-------------------------------------------------|------|------|------|------|
| 60 | C <sub>11</sub> H <sub>16</sub> Cl <sub>2</sub> N <sub>4</sub> O | 291.17 | <chem>O=C1N(C2CCNCC2)C3=CC=CC=C3N1.Cl.Cl</chem> | >95% | 29.4 | 32.5 |      |
|    | <b>Olaparib</b> <sup>b</sup>                                     |        |                                                 | >95% | 53.3 | 55.8 | 99.9 |

<sup>a</sup> Inhibition rate (%): cells were exposed to compounds (50  $\mu$ M) for 72 h, and the inhibition rate was determined by the MTT assay. Each experiment was performed at least three times. <sup>b</sup> Olaparib served as the positive control.

All the compounds come from the present laboratory, including the active intermediates purchased before and the compounds with unidentified activity synthesized by ourselves.

We tested the PARP1 enzyme inhibitory activity of those compounds whose cell inhibition rates exceeded 50% on HCT-15 and HCC1937 cell lines. Finally, **IN17** was found to have the same anti-proliferative activities as Olaparib against two cells, and it can target PARP1 well. Compound **IN17** had great potential for modification.

**Table S2.** IC<sub>50</sub> values of compounds **IN17** against PARP1, HCT-15 and HCC1937 cell lines.

| No.                          | IC <sub>50</sub> ( $\mu$ M) <sup>a</sup> |                  | PARP1<br>IC <sub>50</sub> (nM) <sup>b</sup> |
|------------------------------|------------------------------------------|------------------|---------------------------------------------|
|                              | HCT-15                                   | HCC1937          |                                             |
| <b>IN17</b>                  | 33.45 $\pm$ 1.79                         | 34.29 $\pm$ 2.68 | 471.25 $\pm$ 3.18                           |
| <b>Olaparib</b> <sup>c</sup> | 45.53 $\pm$ 3.13                         | 37.07 $\pm$ 1.89 | 7.30 $\pm$ 1.43                             |

<sup>a</sup> IC<sub>50</sub>: concentration of the compound producing 50% cell growth inhibition after 72 h of drug exposure, as determined by the MTT assay. Each experiment was performed at least three times.

<sup>b</sup> The IC<sub>50</sub> values were presented as mean $\pm$ S.D. of three independent determinations. <sup>c</sup> Olaparib served as the positive control.

**Table S3.** IC<sub>50</sub> values of compounds **IN17-(1-5)** against HCT-15 and HCC1937 cell lines.

| No.                                                                                 | IC <sub>50</sub> (μM) <sup>a</sup> |              |
|-------------------------------------------------------------------------------------|------------------------------------|--------------|
|                                                                                     | HCT-15                             | HCC1937      |
| 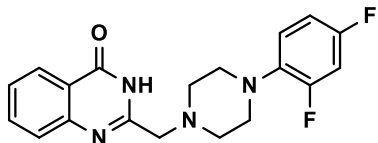   | >100                               | >100         |
|    | >100                               | >100         |
|  | >100                               | >100         |
|  | >100                               | >100         |
|  | 55.15 ± 4.08                       | 46.41 ± 2.76 |
| <b>Olaparib<sup>b</sup></b>                                                         | 45.53 ± 3.13                       | 37.07 ± 1.89 |

<sup>a</sup> IC<sub>50</sub>: concentration of the compound producing 50% cell growth inhibition after 72 h of drug exposure, as determined by the MTT assay. Each experiment was performed at least three times.

<sup>b</sup> Olaparib served as the positive control.

## **S2: The Synthesis method of Compounds Y1-Y5**

## **S2: The Synthesis method of Compounds Y1-Y5**

### **Procedure:**

To a solution of triphosgene (2.96 g, 10 mmol) in toluene was added triethylamine (10.12 g, 0.1 mol) and the mixture was stirred at room temperature for 5 min. The aniline derivative was dissolved in toluene and added dropwise to the reaction mixture at 0 °C. The mixture was stirred at 0 °C for 1 h, and then stirred for at 100 °C 1 h. After completion of the reaction, toluene was removed under vacuo, then 60 mL water was added, extracted with ethyl acetate (30 mL  $\times$  3) and washed with saturated sodium chloride (30 mL). The combined organic layer was dried on anhydrous sodium sulfate and concentrated in vacuo. The resulting mixture was concentrated in vacuo to obtain the crude target product, and this crude target product was used for the next step without any treatment.

**S3: The Synthesis method of Compounds**  
**IN17, IN17-(1-5)**

### **S3: The Synthesis method of Compounds IN17, IN17-(1-5)**

#### **1.1 The Synthesis method of Compounds IN17**

##### **Procedure:**

To a solution of the compound **4** (0.28 g, 1 mmol) in tetrahydrofuran was added 2,4-difluorophenyl isocyanate (0.31 g, 2 mmol) and triethylamine (0.5 mL, 5 mmol). The reaction mixture was stirred at room temperature for 4 h. Then the mixture was filtered through a pad of Celite and washed with ethyl acetate. The organic solvent was removed under vacuum and the residue was purified by silica-gel column chromatography to give the compound **IN17**. White solid, yield 55.7 %.

##### **N-(2,4-difluorophenyl)-4-((4-oxo-3,4-dihydroquinazolin-2-yl)methyl)piperazine-1-carboxamide:**

<sup>1</sup>H NMR (400 MHz, CDCl<sub>3</sub>) δ 9.95 (s, 1H), 8.29 (d, J = 7.9 Hz, 1H), 7.97 (dd, J = 15.6, 8.8 Hz, 1H), 7.78 (t, J = 7.5 Hz, 1H), 7.68 (d, J = 8.1 Hz, 1H), 7.50 (t, J = 7.5 Hz, 1H), 6.85 (dd, J = 12.7, 7.5 Hz, 2H), 6.45 (s, 1H), 3.65 (s, 2H), 3.61 (s, 4H), 2.68 (s, 4H). <sup>13</sup>C NMR (100 MHz, DMSO-d<sub>6</sub>) δ 162.07, 155.50, 154.88, 148.85, 134.85, 128.22, 127.51, 126.98, 126.26, 121.84, 111.32, 111.07, 104.69, 104.44, 104.18, 60.91, 52.88, 44.13. ESI-MS: calculated for C<sub>20</sub>H<sub>19</sub>F<sub>2</sub>N<sub>5</sub>O<sub>2</sub> [M+H]<sup>+</sup> 400.15068, found 400.14975.

#### **1.2 The Synthesis method of Compounds IN17-1**

##### **Procedure:**

To a solution of the compound **2** (0.20 g, 1 mmol) in N,N-dimethylformamide was added 1-(2,4-difluorophenyl)piperazine (0.24 g, 1.2 mmol) and K<sub>2</sub>CO<sub>3</sub> (0.41 g, 3 mmol). The reaction mixture was refluxed at 80 °C for 1 h. After cooling to room temperature, the mixture was filtered through a pad of Celite and washed with ethyl acetate. The organic solvent was removed under vacuum and the residue was purified by silica-gel column chromatography to give the compound **IN17-1**. White solid, yield 56.3 %.

##### **2-((4-(2,4-difluorophenyl)piperazin-1-yl)methyl)quinazolin-4(3H)-one:**

<sup>1</sup>H NMR (400 MHz, DMSO-d<sub>6</sub>) δ 12.01 (s, 1H), 8.13 (d, J = 7.7 Hz, 1H), 7.81 (t, J = 7.4 Hz, 1H), 7.68 (d, J = 8.1 Hz, 1H), 7.52 (t, J = 7.2 Hz, 1H), 7.23 – 7.15 (m, 1H),

7.07 (dd,  $J = 15.6, 8.0$  Hz, 1H), 6.99 (t,  $J = 8.3$  Hz, 1H), 3.53 (s, 2H), 3.00 (s, 4H), 2.69 (s, 4H).  $^{13}\text{C}$  NMR (100 MHz, DMSO- $d_6$ )  $\delta$  162.07, 154.53, 148.87, 134.82, 127.51, 126.95, 126.24, 121.80, 120.51, 111.44, 105.30, 105.05, 104.79, 60.98, 53.09, 50.83. ESI-MS: calculated for  $\text{C}_{19}\text{H}_{18}\text{F}_2\text{N}_4\text{O}$   $[\text{M}+\text{H}]^+$  356.14487, found 356.14568.

### 1.3 The Synthesis method of Compounds IN17-2

#### Procedure:

To a solution of the compound **2** (0.20 g, 1 mmol) in N,N-dimethylformamide was added 1-(2,4-difluorobenzyl)piperazine (0.25 g, 1.2 mmol) and  $\text{K}_2\text{CO}_3$  (0.41 g, 3 mmol). The reaction mixture was refluxed at 80 °C for 1 h. After cooling to room temperature, the mixture was filtered through a pad of Celite and washed with ethyl acetate. The organic solvent was removed under vacuum and the residue was purified by silica-gel column chromatography to give the compound **IN17-2**. White solid, yield 58.9 %.

#### 2-((4-(2,4-difluorobenzyl)piperazin-1-yl)methyl)quinazolin-4(3H)-one:

$^1\text{H}$  NMR (400 MHz, DMSO- $d_6$ )  $\delta$  11.90 (s, 1H), 8.11 (d,  $J = 7.8$  Hz, 1H), 7.80 (t,  $J = 7.5$  Hz, 1H), 7.65 (d,  $J = 8.1$  Hz, 1H), 7.55 – 7.40 (m, 2H), 7.21 (t,  $J = 9.6$  Hz, 1H), 7.07 (t,  $J = 8.1$  Hz, 1H), 3.54 (s, 2H), 3.46 (s, 2H), 3.38 (s, 2H), 2.55 (s, 4H), 2.48 (s, 2H).  $^{13}\text{C}$  NMR (100 MHz, DMSO- $d_6$ )  $\delta$  162.01, 154.54, 148.84, 134.81, 133.23, 127.47, 126.93, 126.23, 121.78, 111.84, 111.62, 104.25, 103.86, 60.82, 54.28, 52.45. ESI-MS: calculated for  $\text{C}_{20}\text{H}_{20}\text{F}_2\text{N}_4\text{O}$   $[\text{M}+\text{H}]^+$  370.16052, found 370.15977.

### 1.4 The Synthesis method of Compounds IN17-3

#### Procedure:

To a solution of the compound **4** (0.28 g, 1 mmol) in tetrahydrofuran was added 2,4-difluorobenzoyl chloride (0.25 g, 1.2 mmol) and triethylamine (0.5 mL, 5 mmol). The reaction mixture was stirred at room temperature for 4 h. Then the mixture was filtered through a pad of Celite and washed with ethyl acetate. The organic solvent was removed under vacuum and the residue was purified by silica-gel column chromatography to give the compound **IN17-3**. White solid, yield 61.2 %.

#### 2-((4-(2,4-difluorobenzoyl)piperazin-1-yl)methyl)quinazolin-4(3H)-one:

$^1\text{H}$  NMR (400 MHz, DMSO- $d_6$ )  $\delta$  12.01 (s, 1H), 8.11 (d,  $J = 7.9$  Hz, 1H), 7.80 (t,  $J =$

7.5 Hz, 1H), 7.64 (d, J = 8.1 Hz, 1H), 7.50 (dd, J = 12.8, 6.7 Hz, 2H), 7.37 (t, J = 9.8 Hz, 1H), 7.18 (t, J = 8.5 Hz, 1H), 3.68 (s, 2H), 3.50 (s, 2H), 3.35 (s, 2H), 3.26 (s, 2H), 2.59 (s, 2H).  $^{13}\text{C}$  NMR (100 MHz, DMSO- $d_6$ )  $\delta$  163.61, 154.41, 134.85, 130.95, 127.54, 127.00, 126.24, 121.82, 112.84, 104.90, 60.71, 53.16, 52.59, 46.99, 41.85. ESI-MS: calculated for  $\text{C}_{20}\text{H}_{18}\text{F}_2\text{N}_4\text{O}_2$   $[\text{M}+\text{H}]^+$  384.13978, found 384.14013.

### 1.5 The Synthesis method of Compounds IN17-4

#### Procedure:

To a solution of the compound **4** (0.28 g, 1 mmol) in tetrahydrofuran was added 2,4-difluorobenzenesulfonyl chloride (0.21 g, 1.2 mmol) and triethylamine (0.5 mL, 5 mmol). The reaction mixture was stirred at room temperature for 4 h. Then the mixture was filtered through a pad of Celite and washed with ethyl acetate. The organic solvent was removed under vacuum and the residue was purified by silica-gel column chromatography to give the compound **IN17-4**. White solid, yield 53.4 %.

#### 2-((4-((2,4-difluorophenyl)sulfonyl)piperazin-1-yl)methyl)quinazolin-4(3H)-one:

$^1\text{H}$  NMR (400 MHz, DMSO- $d_6$ )  $\delta$  11.87 (s, 1H), 8.09 (d, J = 7.8 Hz, 1H), 7.89 – 7.76 (m, 2H), 7.63 (t, J = 7.0 Hz, 2H), 7.49 (t, J = 7.4 Hz, 1H), 7.35 (t, J = 8.3 Hz, 1H), 3.49 (s, 2H), 3.09 (s, 4H), 2.60 (s, 4H).  $^{13}\text{C}$  NMR (100 MHz, DMSO- $d_6$ )  $\delta$  162.01, 158.51, 154.42, 148.83, 134.83, 133.65, 127.49, 126.96, 126.23, 121.82, 113.09, 107.40, 106.99, 106.59, 60.31, 52.00, 45.92. ESI-MS: calculated for  $\text{C}_{19}\text{H}_{18}\text{F}_2\text{N}_4\text{O}_3\text{S}$   $[\text{M}+\text{H}]^+$  420.10677, found 420.10745.

### 1.6 The Synthesis method of Compounds IN17-5

#### Procedure:

To a solution of the compound **4** (0.28 g, 1 mmol) in tetrahydrofuran was added 2,4-difluoro-1-(sulfinylamino)benzene (0.35 g, 2 mmol) and triethylamine (0.5 mL, 5 mmol). The reaction mixture was stirred at room temperature for 4 h. Then the mixture was filtered through a pad of Celite and washed with ethyl acetate. The organic solvent was removed under vacuum and the residue was purified by silica-gel column chromatography to give the compound **IN17-5**. White solid, yield 55.9 %.

#### N-(2,4-difluorophenyl)-4-((4-oxo-3,4-dihydroquinazolin-2-yl)methyl)piperazine-1-carbothioamide:

$^1\text{H}$  NMR (400 MHz, DMSO- $\text{d}_6$ )  $\delta$  12.02 (s, 1H), 9.14 (s, 1H), 8.13 (d,  $J = 7.8$  Hz, 1H), 7.81 (t,  $J = 7.5$  Hz, 1H), 7.67 (d,  $J = 8.1$  Hz, 1H), 7.52 (t,  $J = 7.3$  Hz, 1H), 7.28 (d,  $J = 8.8$  Hz, 2H), 7.06 (d,  $J = 9.0$  Hz, 1H), 3.97 (s, 4H), 3.55 (s, 2H), 2.62 (s, 4H).  $^{13}\text{C}$  NMR (100 MHz, DMSO- $\text{d}_6$ )  $\delta$  182.45, 162.09, 159.27, 156.80, 154.43, 148.90, 134.84, 131.79, 127.52, 126.97, 126.27, 121.85, 111.47, 104.58, 60.55, 52.63, 48.37, 47.06. ESI-MS: calculated for  $\text{C}_{20}\text{H}_{19}\text{F}_2\text{N}_5\text{OS}$   $[\text{M}+\text{H}]^+$  415.12784, found 415.12662.

**S4:  $^1\text{H}$ -NMR and  $^{13}\text{C}$ -NMR Spectral of synthetic compounds**

However, in the hydrogen spectrum, when the deuterated solvent is chloroform, the displacement of the hydrogen atoms on the NH in the skeleton of the compounds are at 9.9 and 10.2, and the NH on the urea are at 6.7 and 7.1, but due to the different substituent groups, it can easily overlap with the other hydrogen atoms of the benzene ring and a cleavage occurs. Meanwhile, the hydrogen displacement of the piperazine ring in the A-series compounds are at 2.70 and 3.61, and the methylene group attached to the skeleton acts at 3.65, which is also influenced by the substituent group, and the top of the methylene group overlaps with the hydrogen on the piperazine. When the deuterated solvent is DMSO, the displacement of the hydrogen atoms on the NH in the skeleton of the compounds is are at 11.0 and 12.0, and the NH on the urea are at 8.5 and 8.6, but due to the different substituent groups, it can easily overlap with the other hydrogen atoms of the benzene ring and a cleavage occurs. Meanwhile, the hydrogen displacement of the piperazine ring in the A-series compounds are at 2.54 and 3.48, and the methylene group attached to the skeleton acts at 3.50, which is also influenced by the substituent group, and the top of the methylene group overlaps with the hydrogen on the piperazine.

### 1.1 $^1\text{H}$ -NMR and $^{13}\text{C}$ -NMR ( $\text{CDCl}_3$ ) spectrum of A1

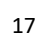

## 1.2 $^1\text{H}$ -NMR and $^{13}\text{C}$ -NMR (DMSO- $d_6$ ) spectrum of A2

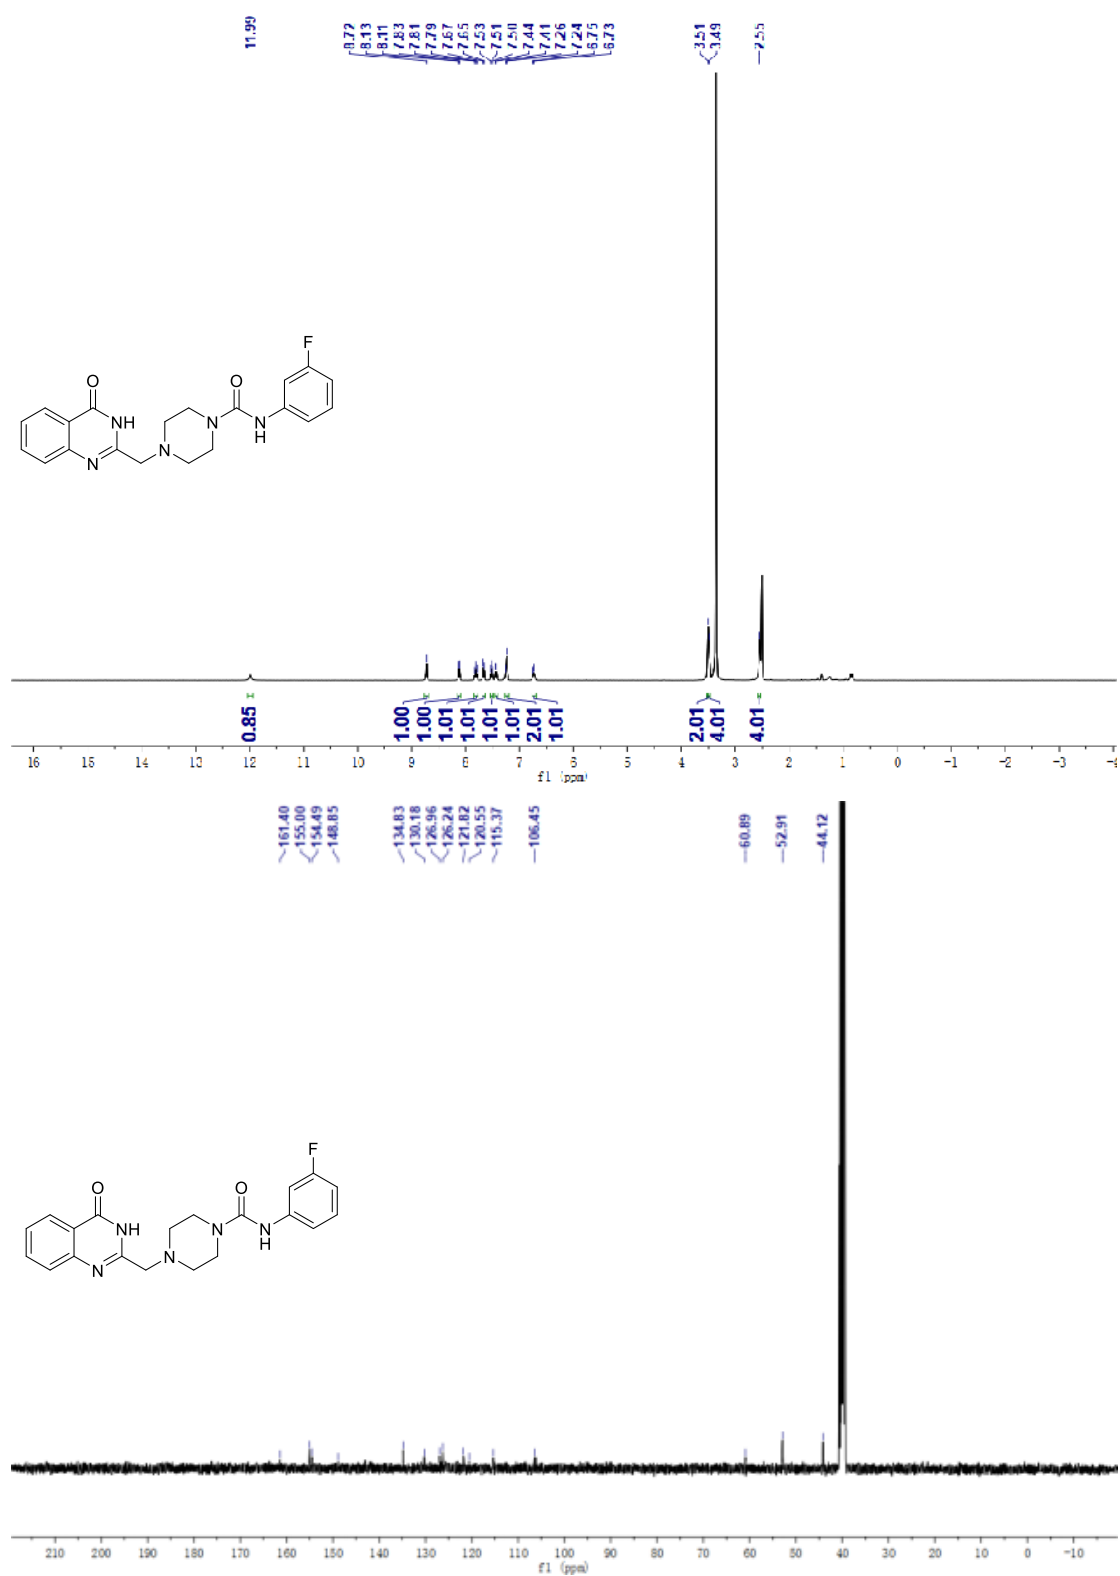

O=C1NC(=O)C2=CC=CC=C2N1CNCCN(CCN2C(=O)Nc3ccc(F)cc3)C2

**<sup>1</sup>H NMR (400 MHz, DMSO-d<sub>6</sub>)**

| Chemical Shift (ppm)                                                                                       | Integration                              |
|------------------------------------------------------------------------------------------------------------|------------------------------------------|
| 8.55, 8.43, 8.41, 8.23, 7.83, 7.81, 7.79, 7.67, 7.65, 7.53, 7.51, 7.49, 7.46, 7.45, 7.43, 7.09, 7.06, 7.04 | 1.00, 1.00, 1.02, 1.01, 1.00, 2.01, 2.02 |
| 3.50, 3.48                                                                                                 | 2.02, 4.02                               |
| 2.54                                                                                                       | 4.02                                     |
| 11.98                                                                                                      | 0.99                                     |

**<sup>13</sup>C NMR (100 MHz, DMSO-d<sub>6</sub>)**

| Chemical Shift (ppm)                                                                                                                        |
|---------------------------------------------------------------------------------------------------------------------------------------------|
| 162.07, 158.98, 156.62, 155.41, 154.51, 148.87, 137.27, 134.85, 127.51, 126.97, 126.26, 121.81, 121.73, 119.34, 115.12, 60.94, 52.95, 44.09 |

O=C1NC(CN2CCN(CC2)NC(=O)Nc3ccccc3Cl)C3=CC=CC=C3N1

**<sup>1</sup>H NMR (CDCl<sub>3</sub>)**

| Chemical Shift (ppm) | Integration                                    |
|----------------------|------------------------------------------------|
| 10.08                | 0.86                                           |
| 7.30-7.52            | 1.00, 1.00, 1.00, 1.03, 1.02, 1.01, 1.05, 2.00 |
| 3.66                 | 6.01                                           |
| 2.70                 | 4.01                                           |

**<sup>13</sup>C NMR (CDCl<sub>3</sub>)**

| Chemical Shift (ppm) |
|----------------------|
| 161.81               |
| 153.97               |
| 152.65               |
| 148.76               |
| 135.51               |
| 134.90               |
| 128.81               |
| 127.77               |
| 127.21               |
| 127.05               |
| 126.59               |
| 123.40               |
| 122.41               |
| 121.70               |
| 121.01               |
| 60.63                |
| 52.92                |
| 43.98                |

[illegible]

# 1.6 $^1\text{H}$ -NMR and $^{13}\text{C}$ -NMR (DMSO- $d_6$ ) spectrum of A6

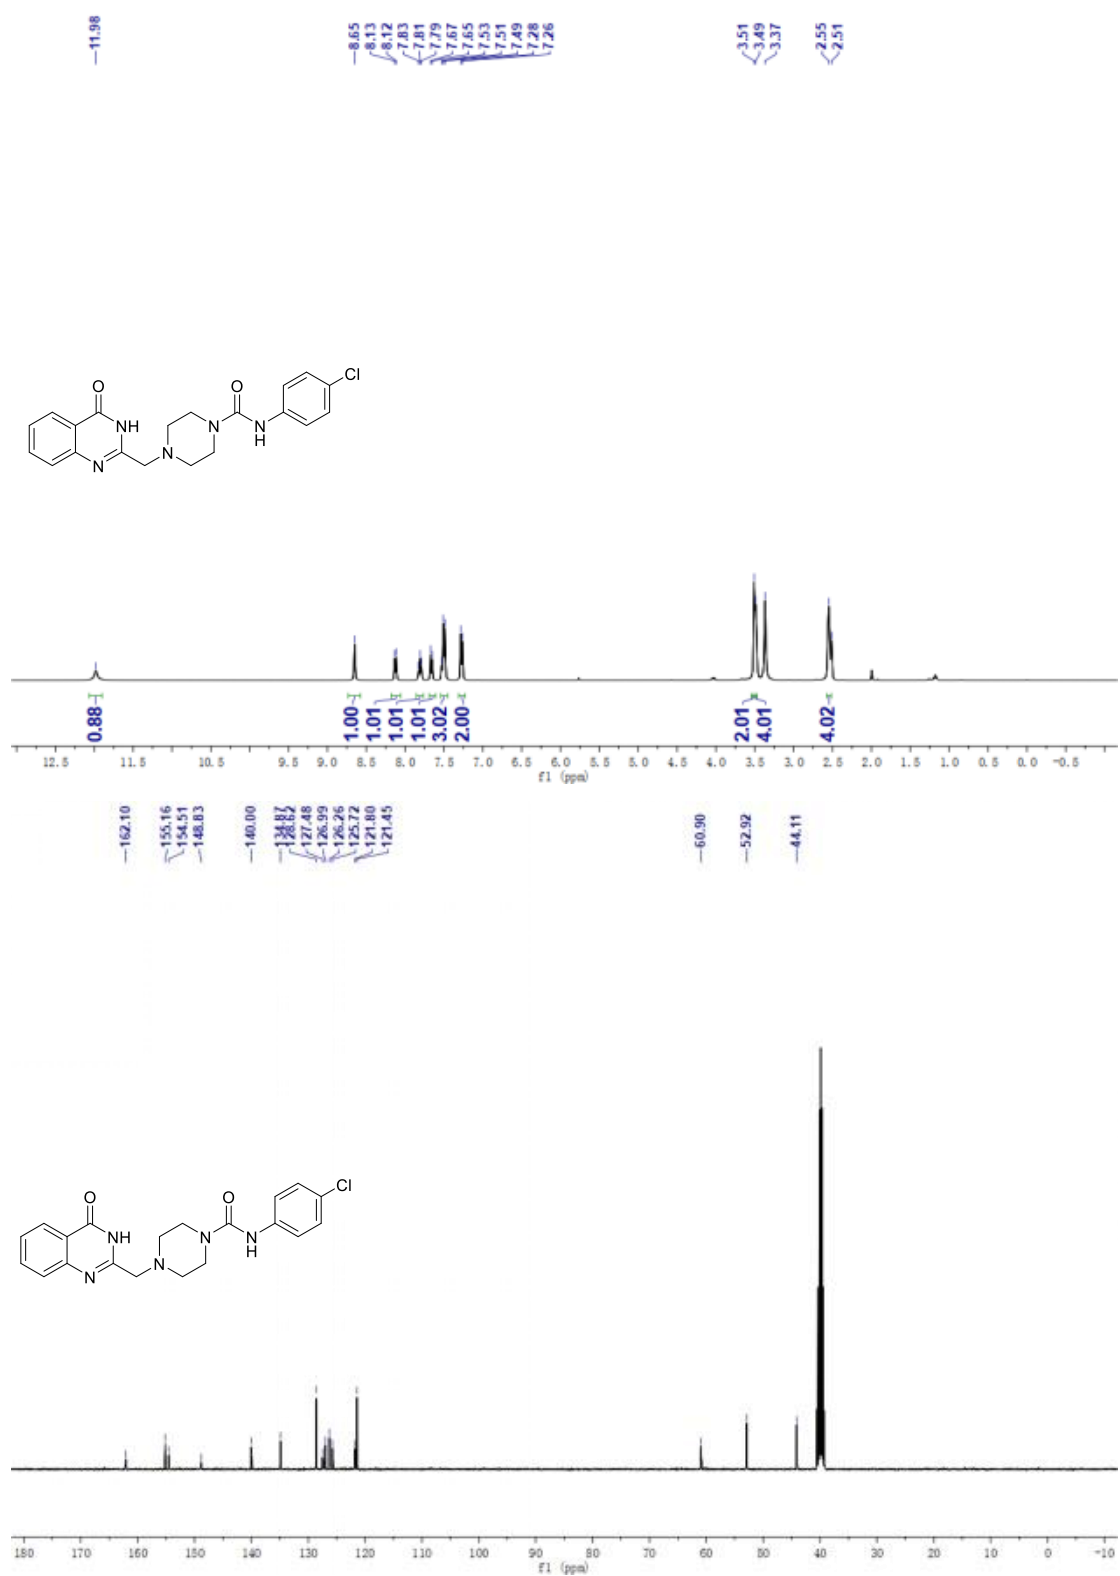

O=C1NC(=N2C=CC=CC=C2N1)CN3CCN(C3)C(=O)Nc4ccccc4Br

**<sup>1</sup>H NMR (400 MHz, DMSO-*d*<sub>6</sub>)**

Chemical structure: O=C1NC(=N2C=CC=CC=C2N1)CN3CCN(C3)C(=O)Nc4ccccc4Br

Peak list (ppm): 10.07, 8.30, 8.28, 8.18, 8.15, 7.80, 7.78, 7.76, 7.69, 7.67, 7.51, 7.49, 7.30, 7.27, 7.03, 6.93, 6.91, 6.69, 3.65, 2.70.

Integration values: 0.90, 1.00, 1.02, 1.00, 2.01, 1.01, 0.96, 1.00, 6.02, 4.01.

**<sup>13</sup>C NMR (100 MHz, DMSO-*d*<sub>6</sub>)**

Chemical structure: O=C1NC(=N2C=CC=CC=C2N1)CN3CCN(C3)C(=O)Nc4ccccc4Br

Peak list (ppm): 161.90, 154.00, 152.73, 148.78, 136.60, 134.88, 132.00, 128.42, 127.23, 127.04, 126.55, 123.94, 121.69, 121.27, 113.36, 60.65, 52.92, 43.99.

# 1.8 $^1\text{H}$ -NMR and $^{13}\text{C}$ -NMR (DMSO- $d_6$ ) spectrum of A8

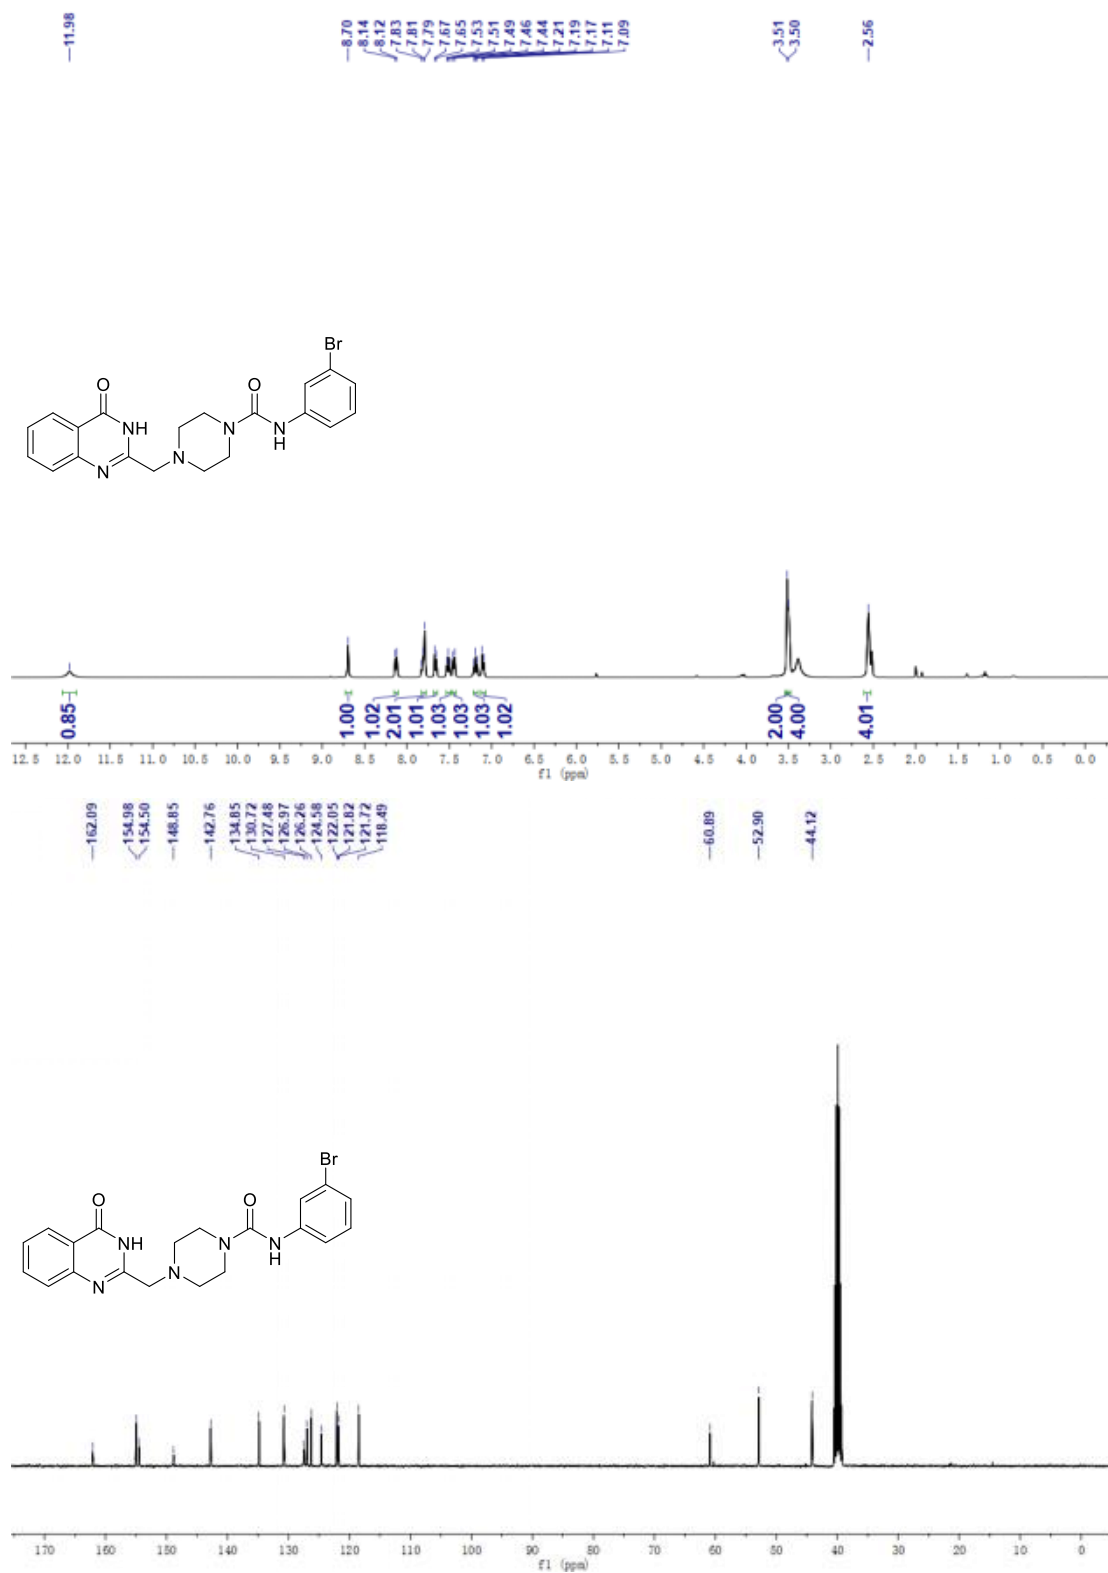

# 1.9 $^1\text{H}$ -NMR and $^{13}\text{C}$ -NMR (DMSO- $d_6$ ) spectrum of A9

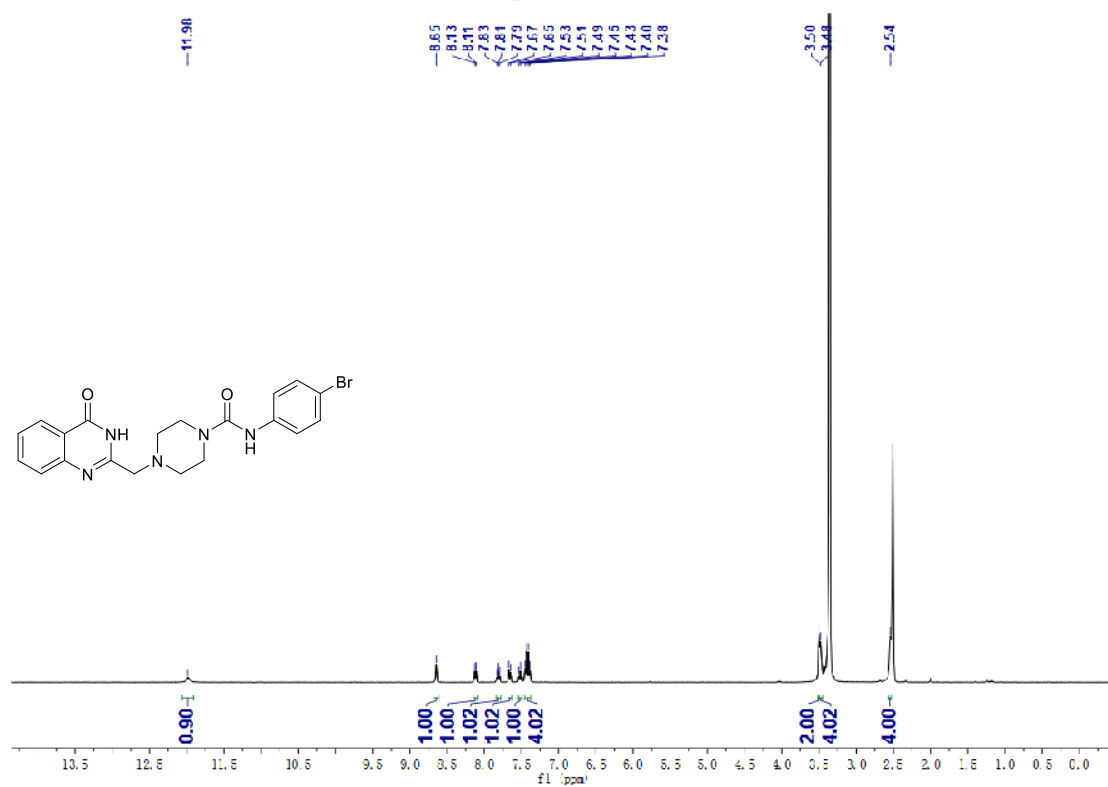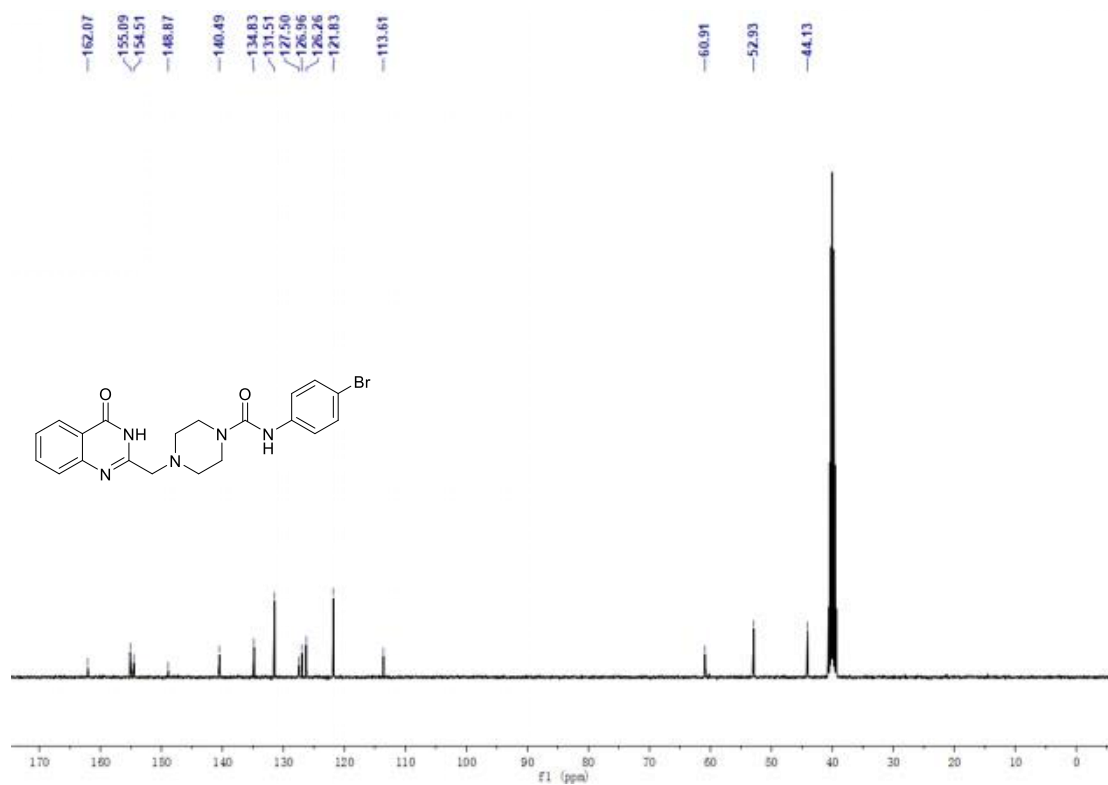

# 1.10 $^1\text{H}$ -NMR and $^{13}\text{C}$ -NMR ( $\text{CDCl}_3$ ) spectrum of A10

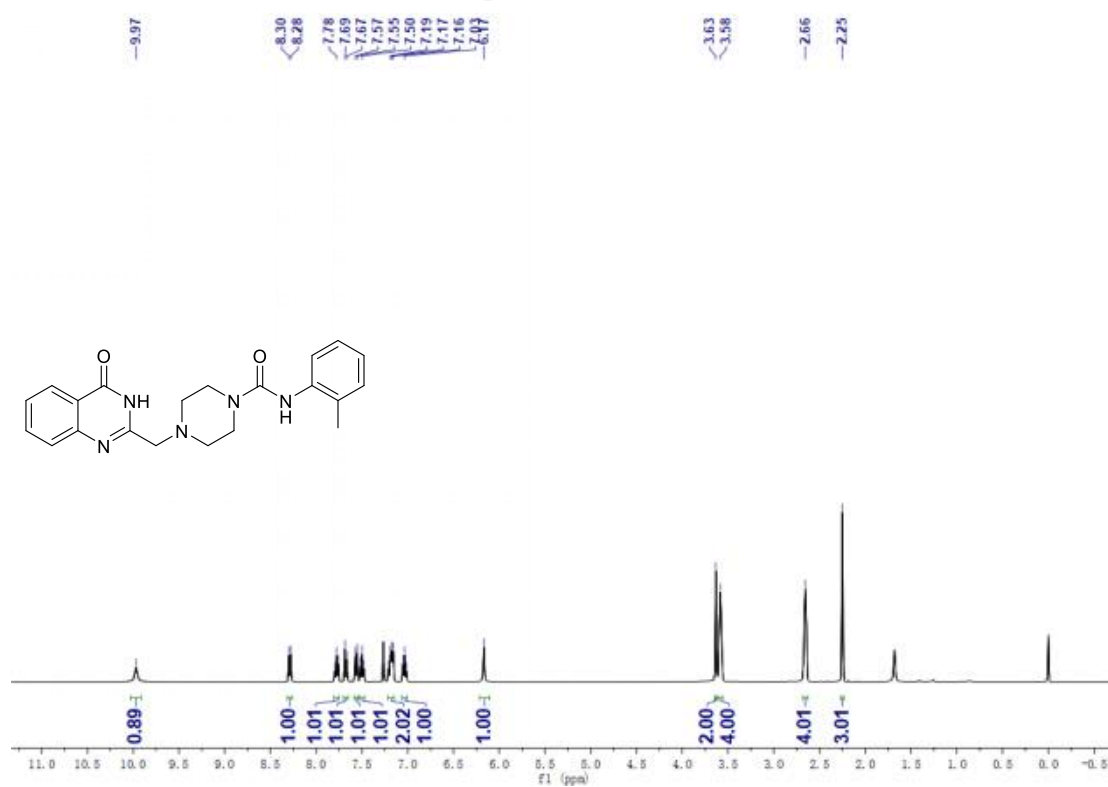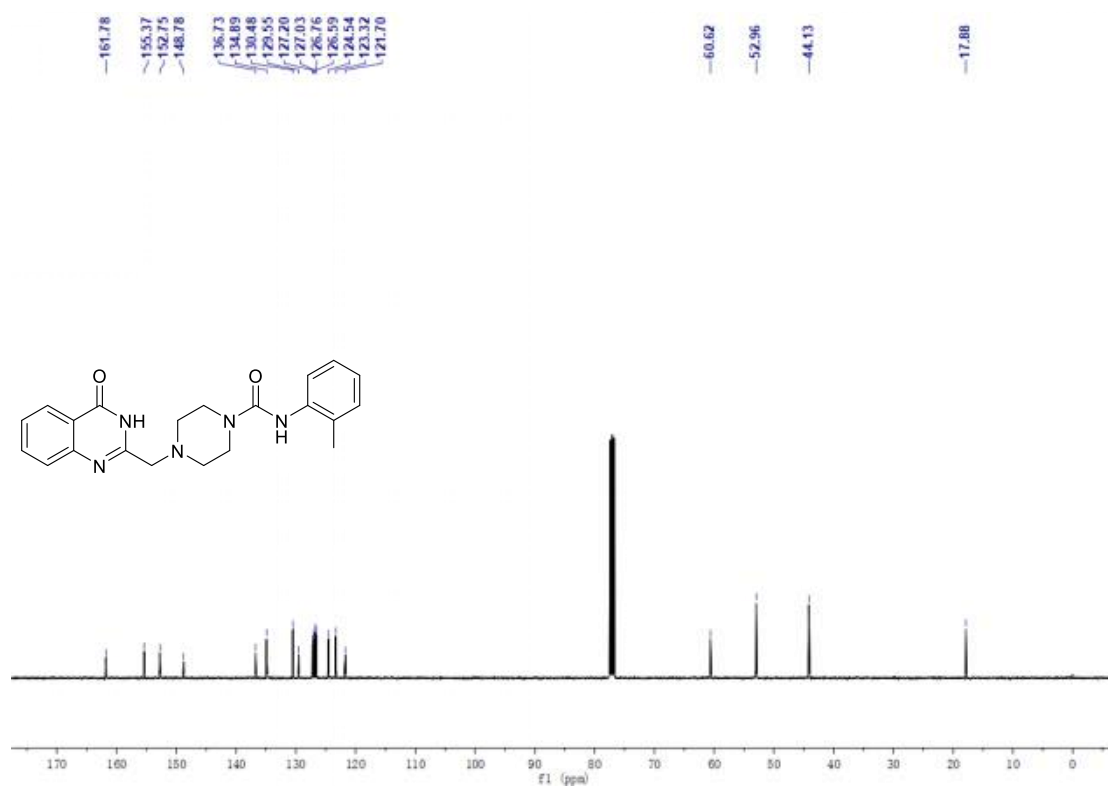

# 1.11 $^1\text{H}$ -NMR and $^{13}\text{C}$ -NMR ( $\text{CDCl}_3$ ) spectrum of A11

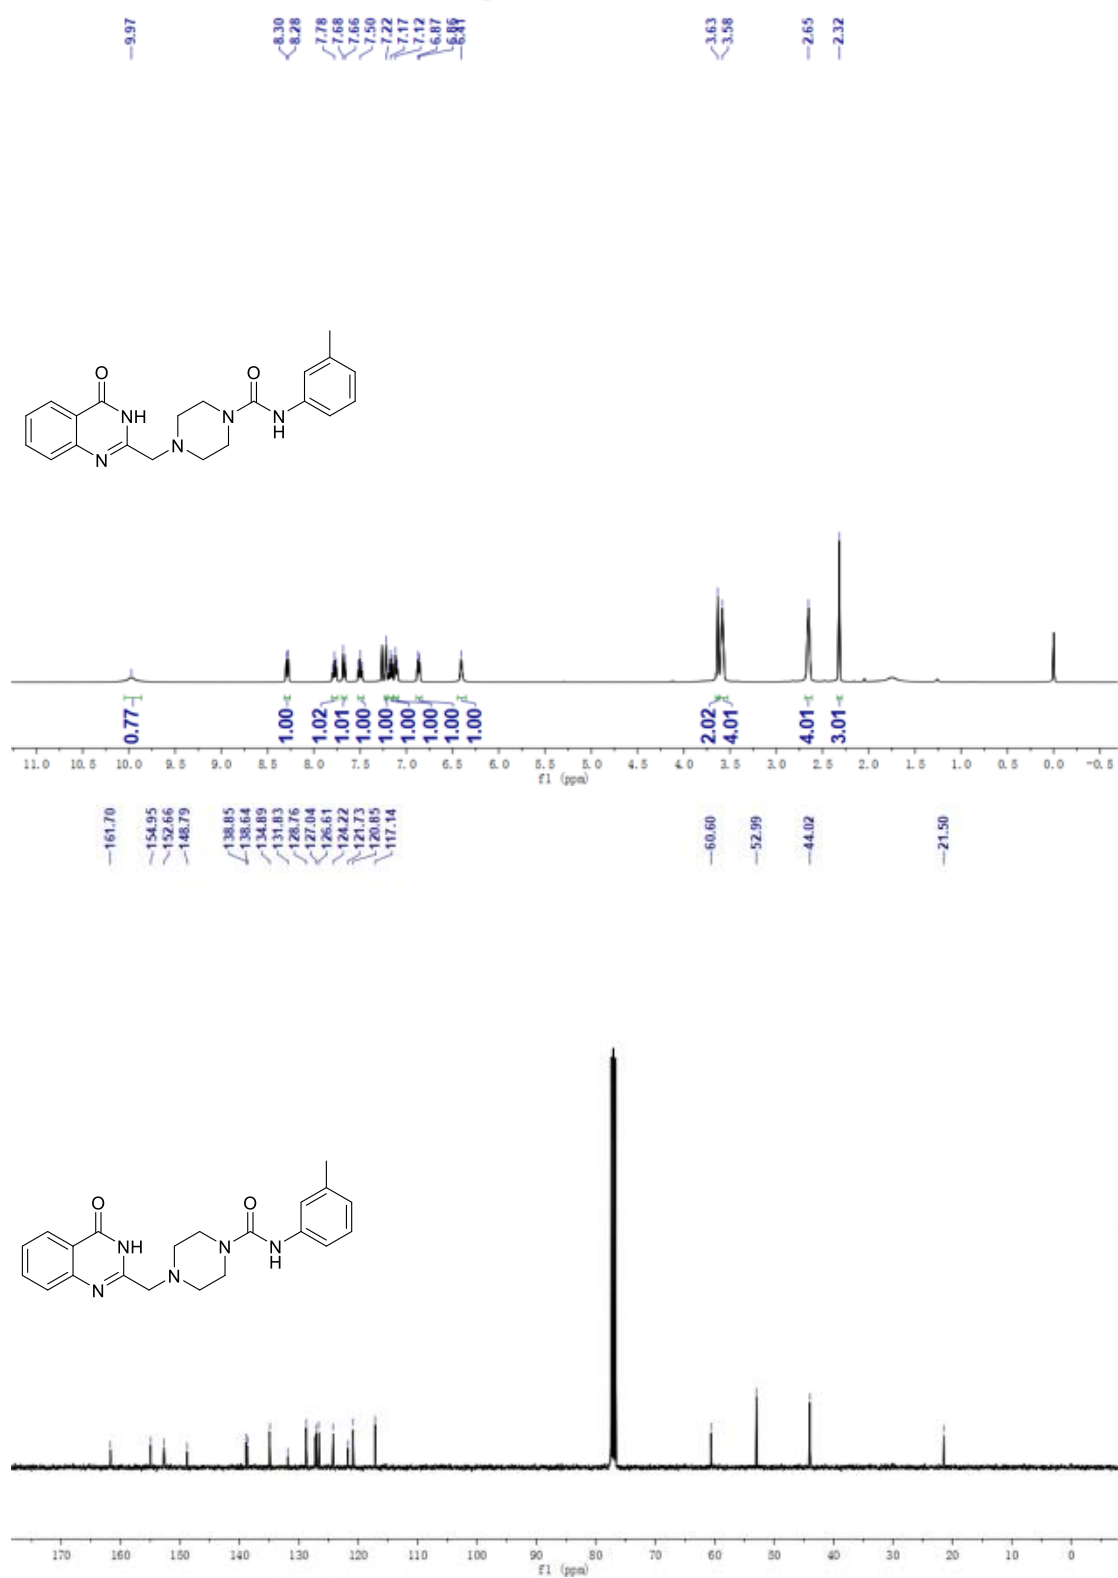

# 1.12 $^1\text{H}$ -NMR and $^{13}\text{C}$ -NMR (DMSO- $d_6$ ) spectrum of A12

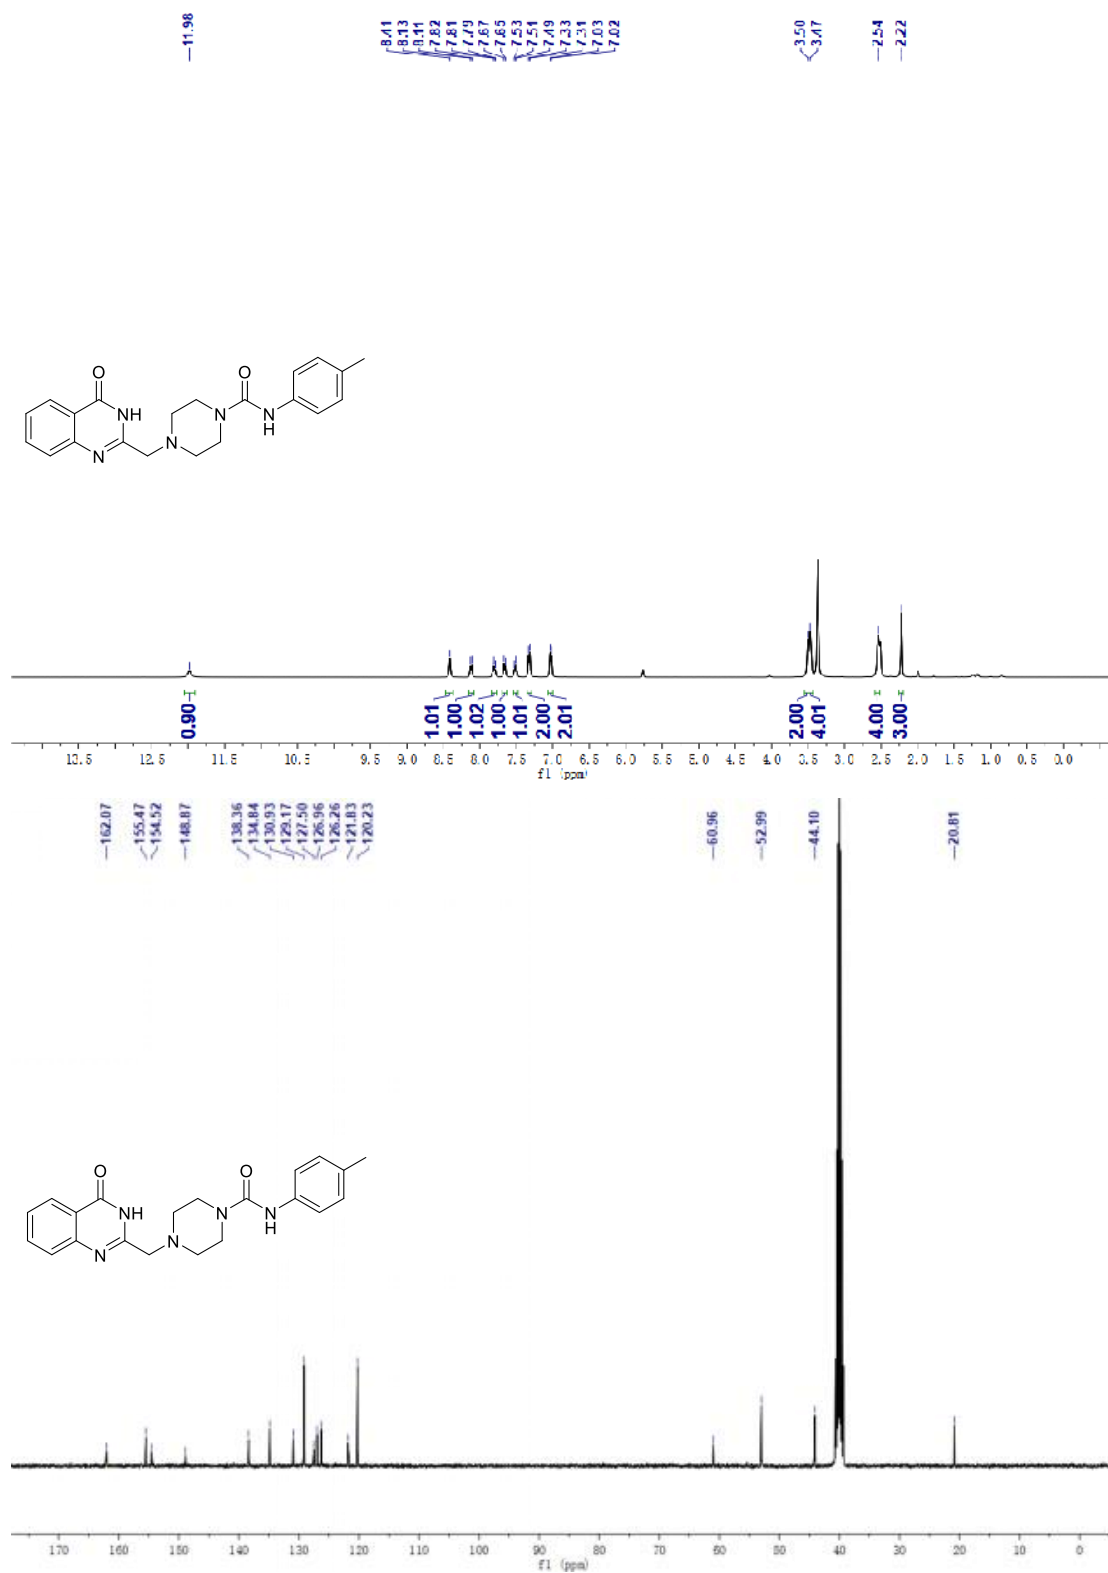

### 1.13 $^1\text{H}$ -NMR and $^{13}\text{C}$ -NMR (DMSO- $d_6$ ) spectrum of A13

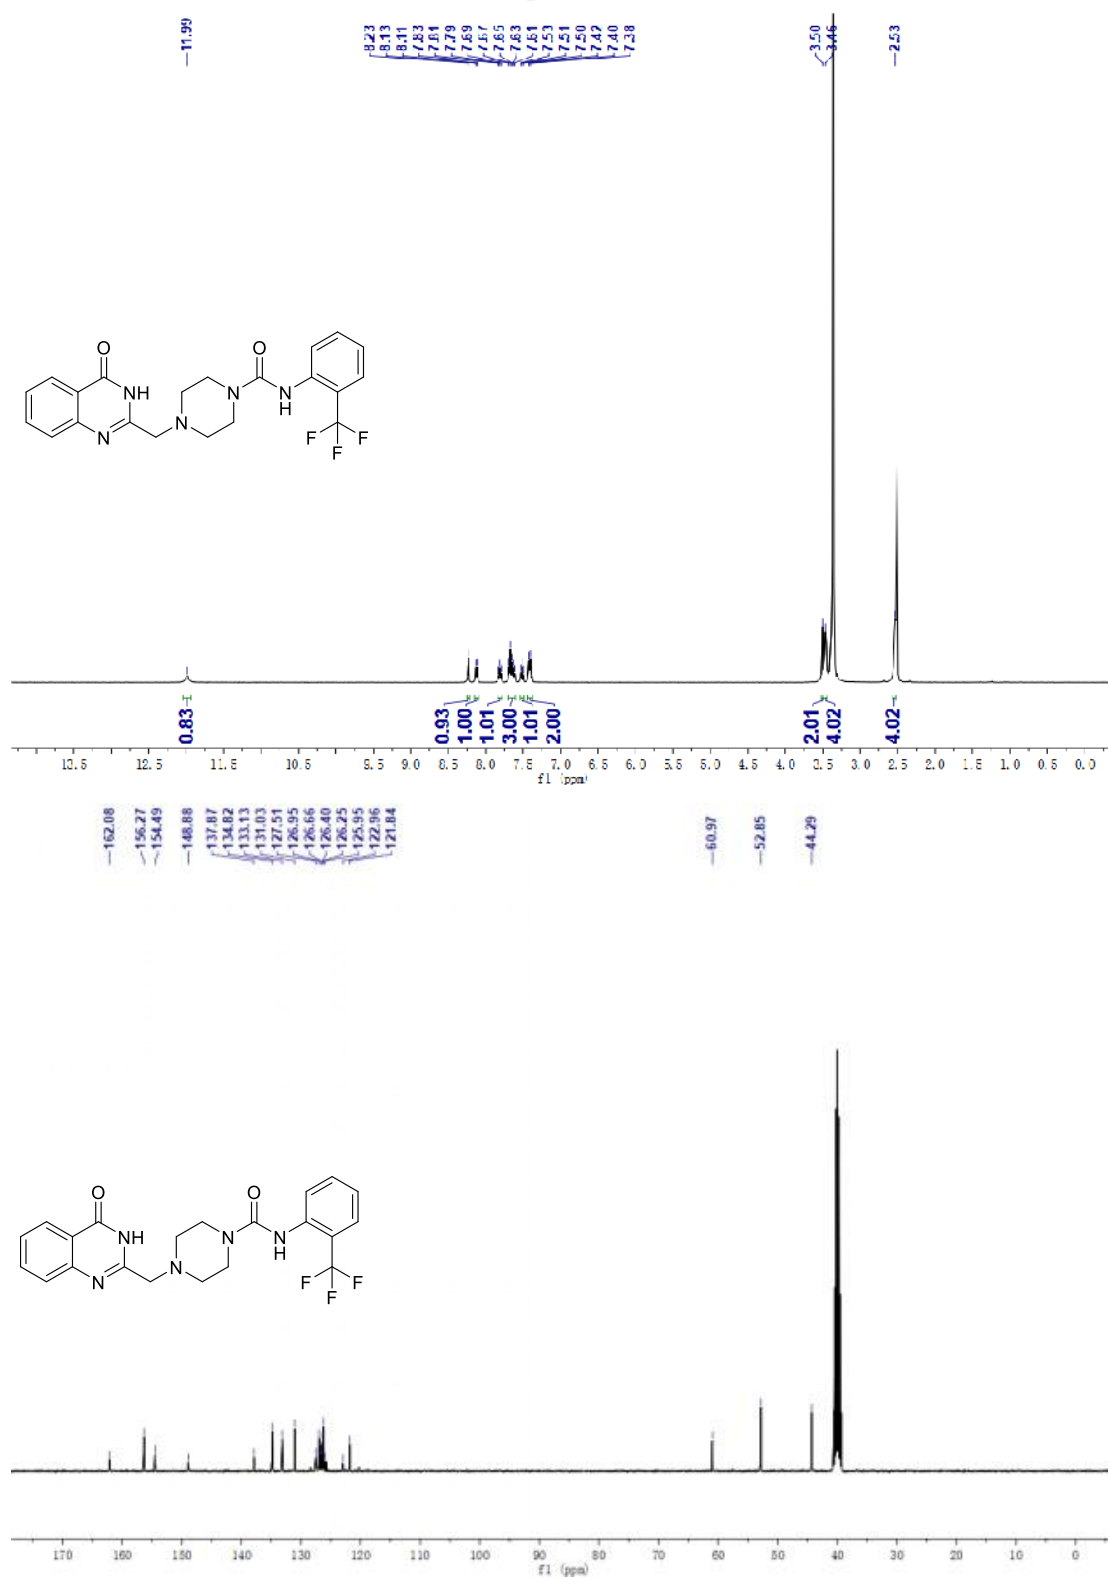

# 1.14 $^1\text{H}$ -NMR and $^{13}\text{C}$ -NMR (DMSO- $d_6$ ) spectrum of A14

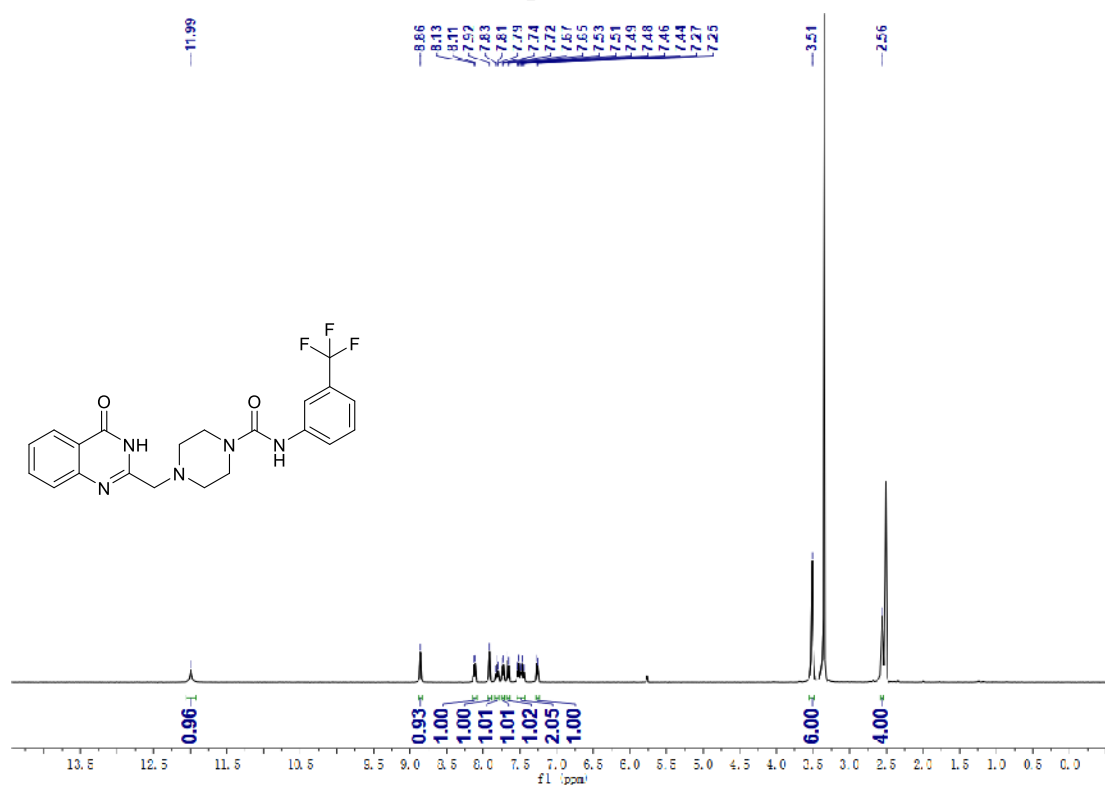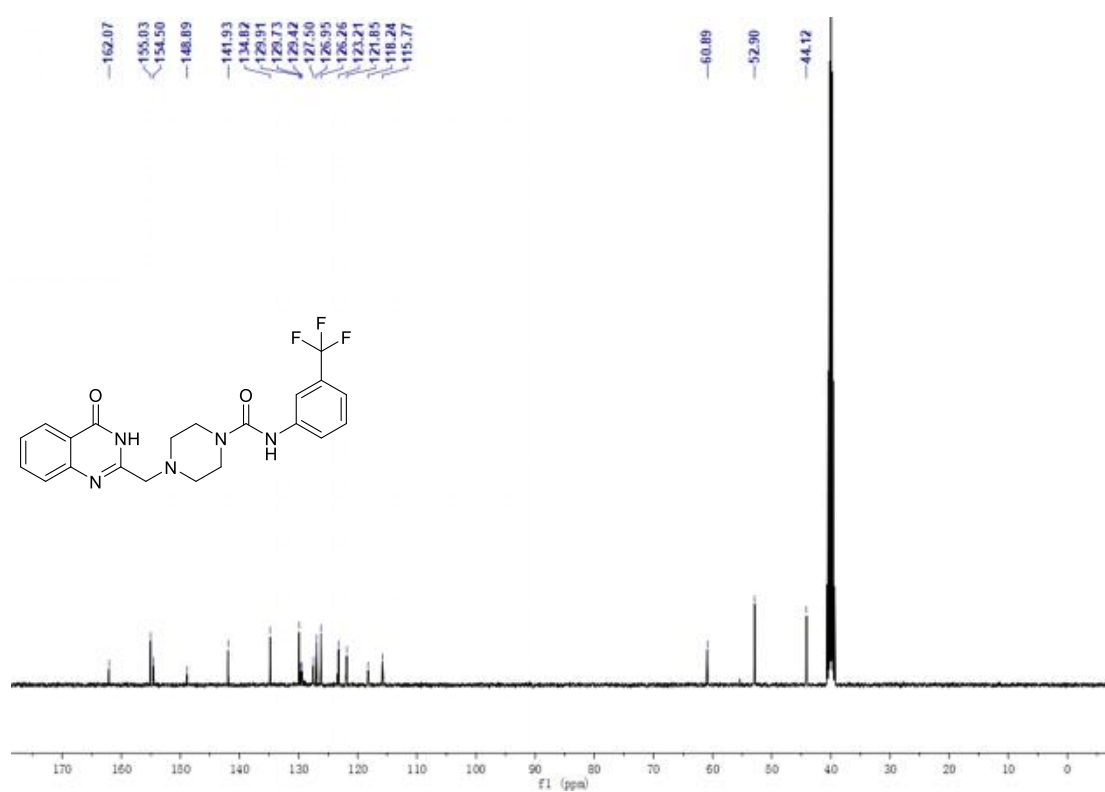

# 1.15 $^1\text{H}$ -NMR and $^{13}\text{C}$ -NMR (DMSO- $d_6$ ) spectrum of A15

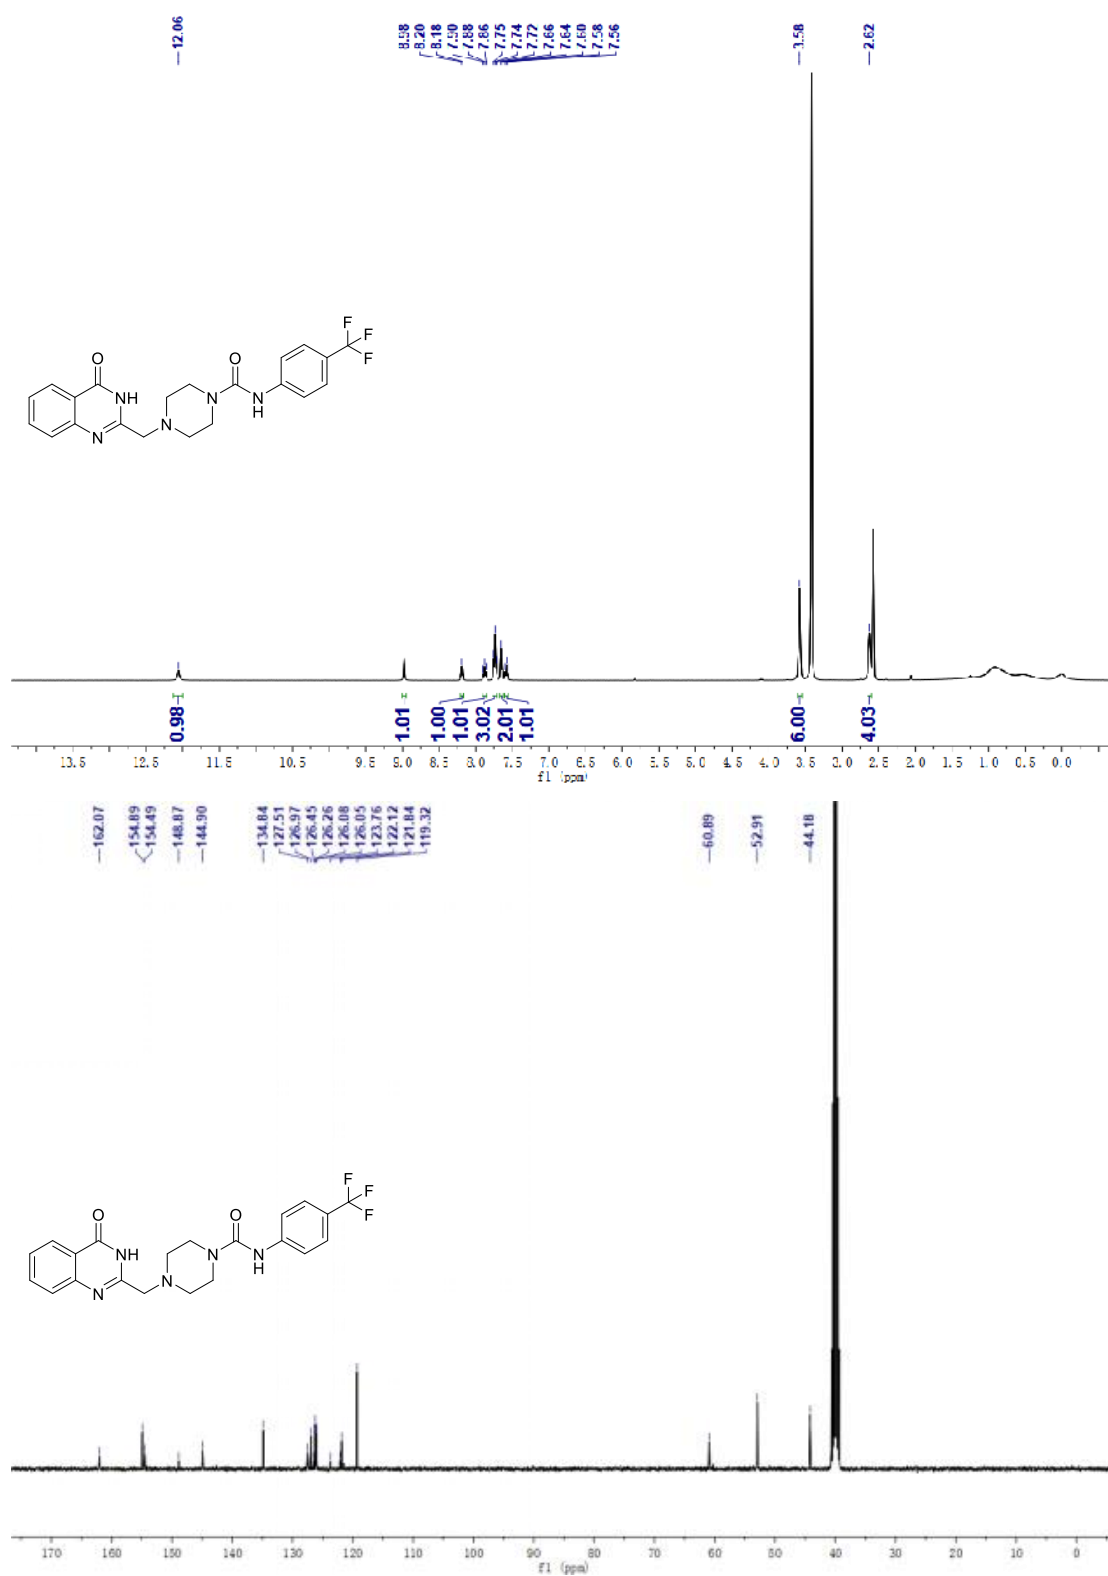

# 1.16 $^1\text{H}$ -NMR and $^{13}\text{C}$ -NMR ( $\text{CDCl}_3$ ) spectrum of A16

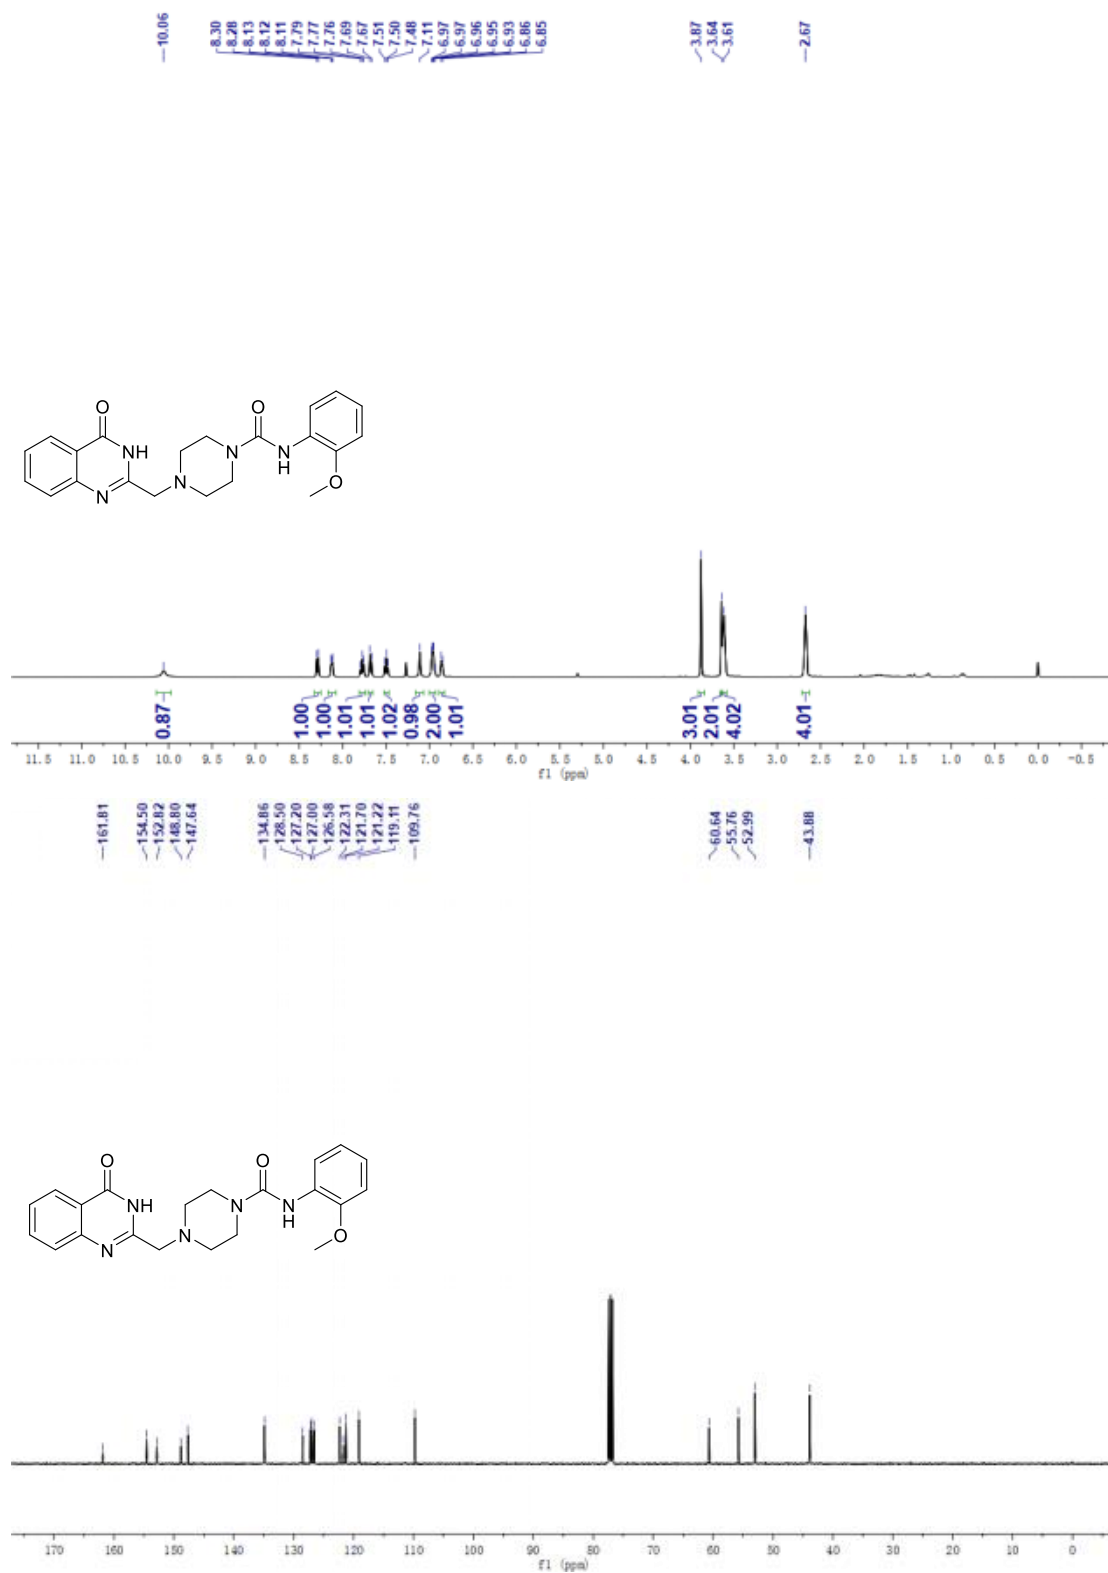

# 1.17 $^1\text{H}$ -NMR and $^{13}\text{C}$ -NMR ( $\text{CDCl}_3$ ) spectrum of A17

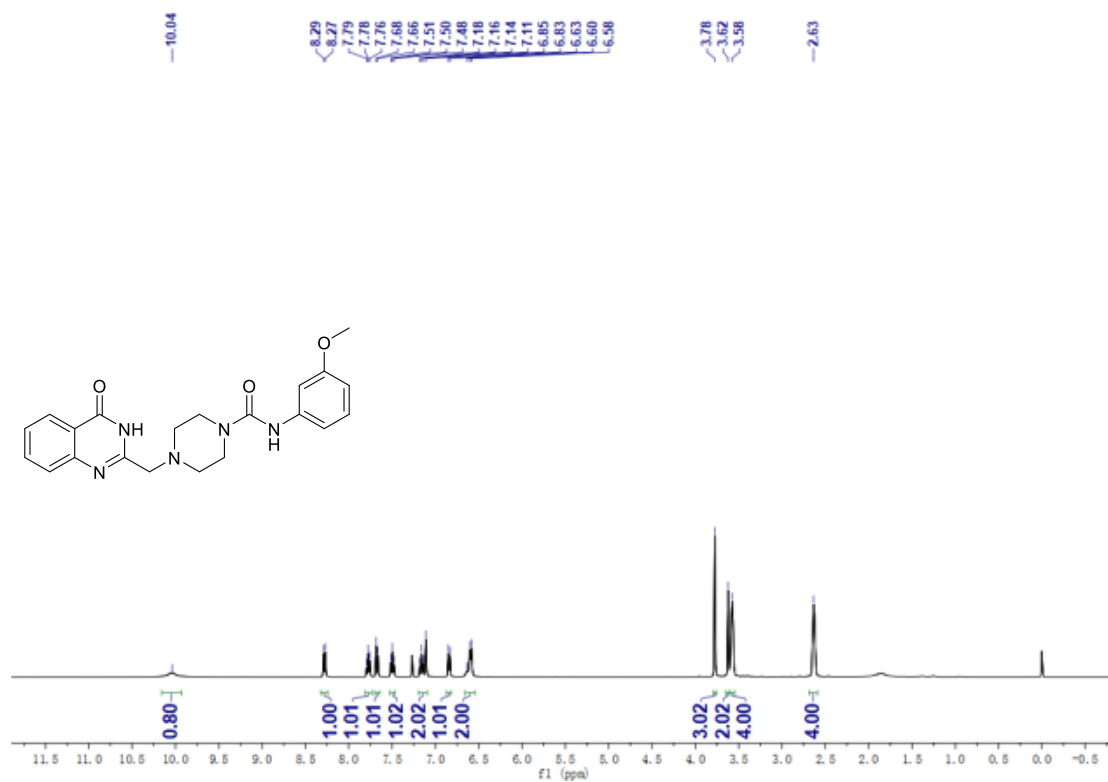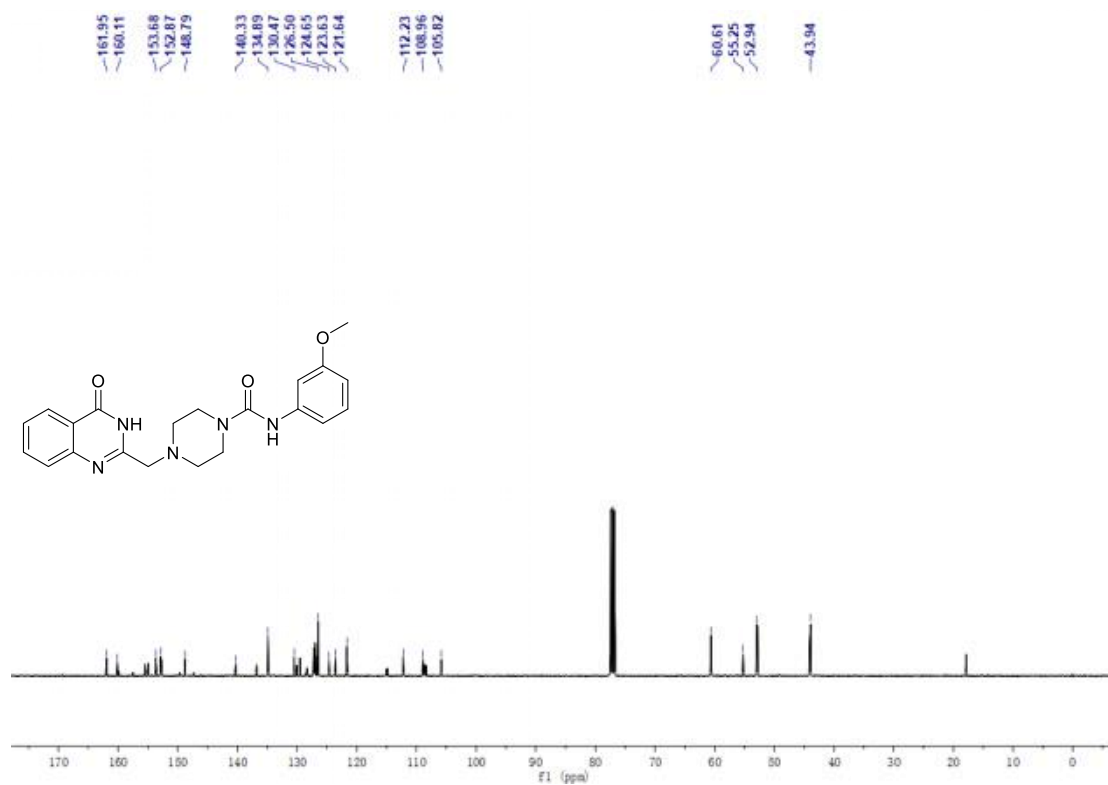

# 1.18 $^1\text{H}$ -NMR and $^{13}\text{C}$ -NMR ( $\text{CDCl}_3$ ) spectrum of A18

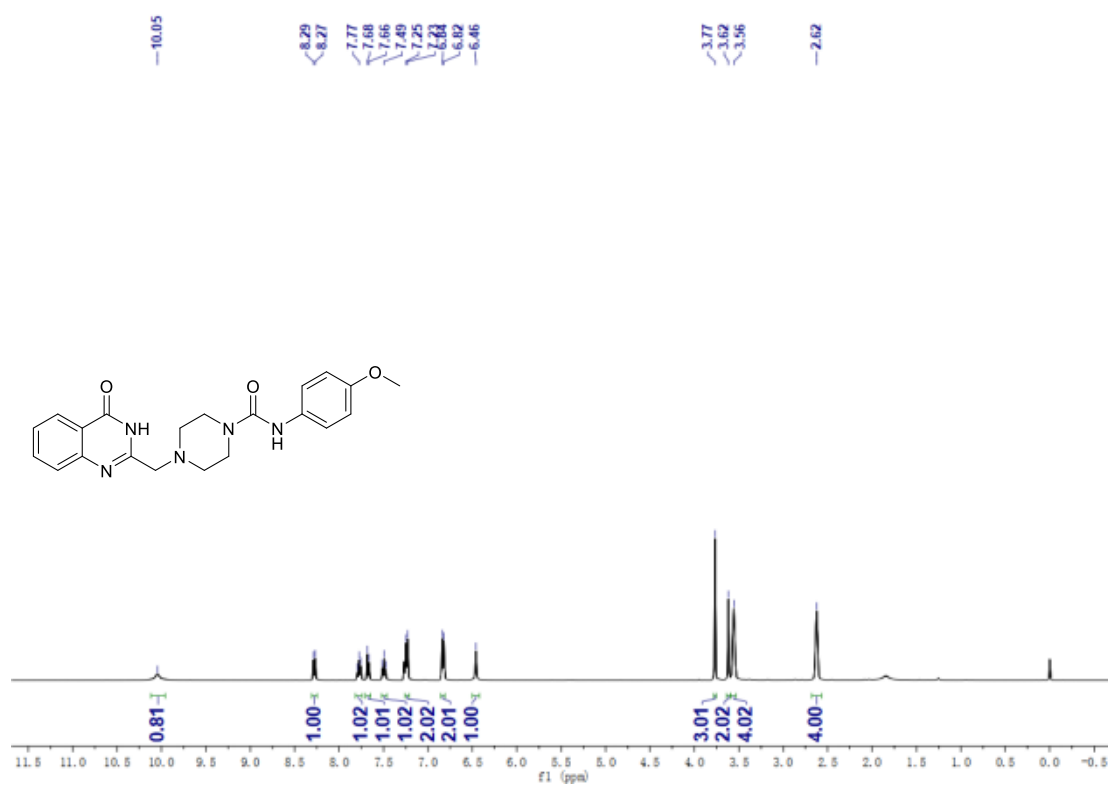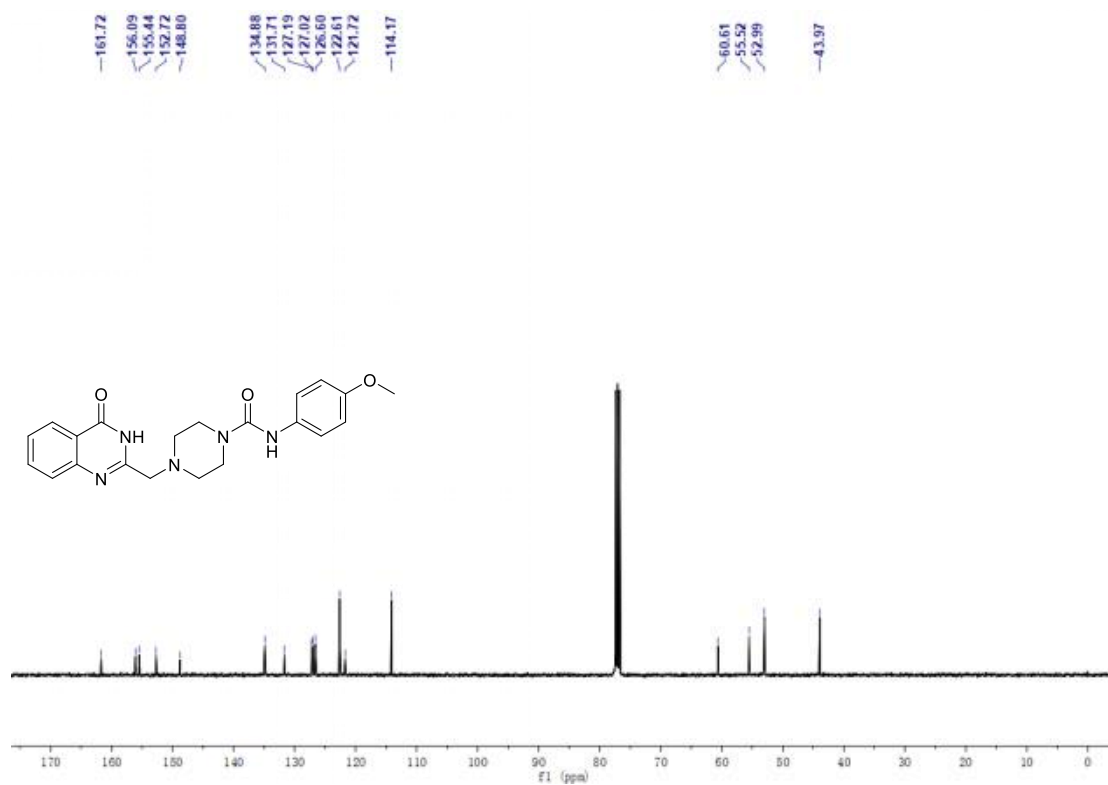

# 1.19 $^1\text{H}$ -NMR and $^{13}\text{C}$ -NMR ( $\text{CDCl}_3$ ) spectrum of A19

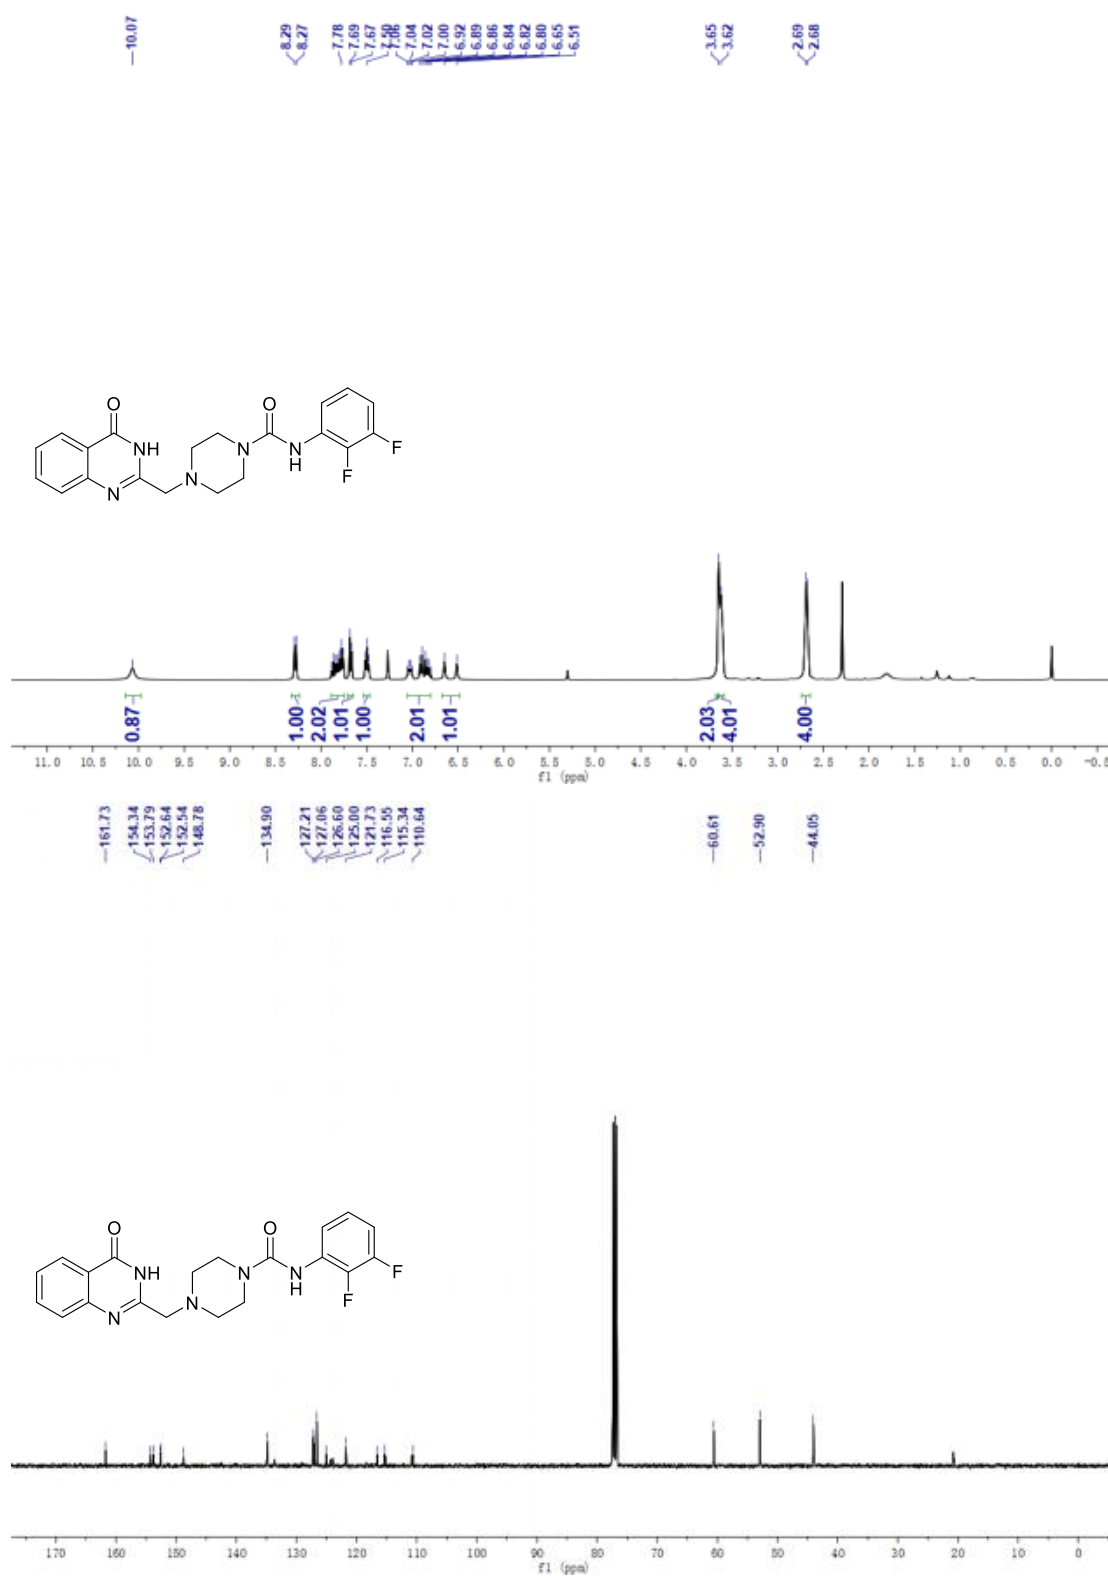

**<sup>1</sup>H NMR Spectrum (400 MHz, DMSO-*d*<sub>6</sub>):**

Chemical structure: NC(=O)N1CCN(CC1)Cc2nc3ccccc3c2=O

Peak list (ppm): 11.99, 8.13, 8.11, 7.83, 7.81, 7.79, 7.67, 7.65, 7.53, 7.51, 7.50, 7.41, 7.24, 7.23, 6.91, 3.51, 3.48, 2.55.

Integration values: 0.96, 0.98, 1.00, 1.00, 1.01, 1.02, 1.02, 1.03, 1.01, 2.01, 4.00, 4.00.

**<sup>13</sup>C NMR Spectrum (100 MHz, DMSO-*d*<sub>6</sub>):**

Peak list (ppm): 162.08, 159.26, 156.90, 154.95, 152.39, 148.87, 134.82, 129.57, 127.50, 126.95, 126.25, 121.84, 116.77, 111.88, 110.56, 60.91, 52.86, 44.27.

# 1.21 $^1\text{H}$ -NMR and $^{13}\text{C}$ -NMR (DMSO- $d_6$ ) spectrum of A21

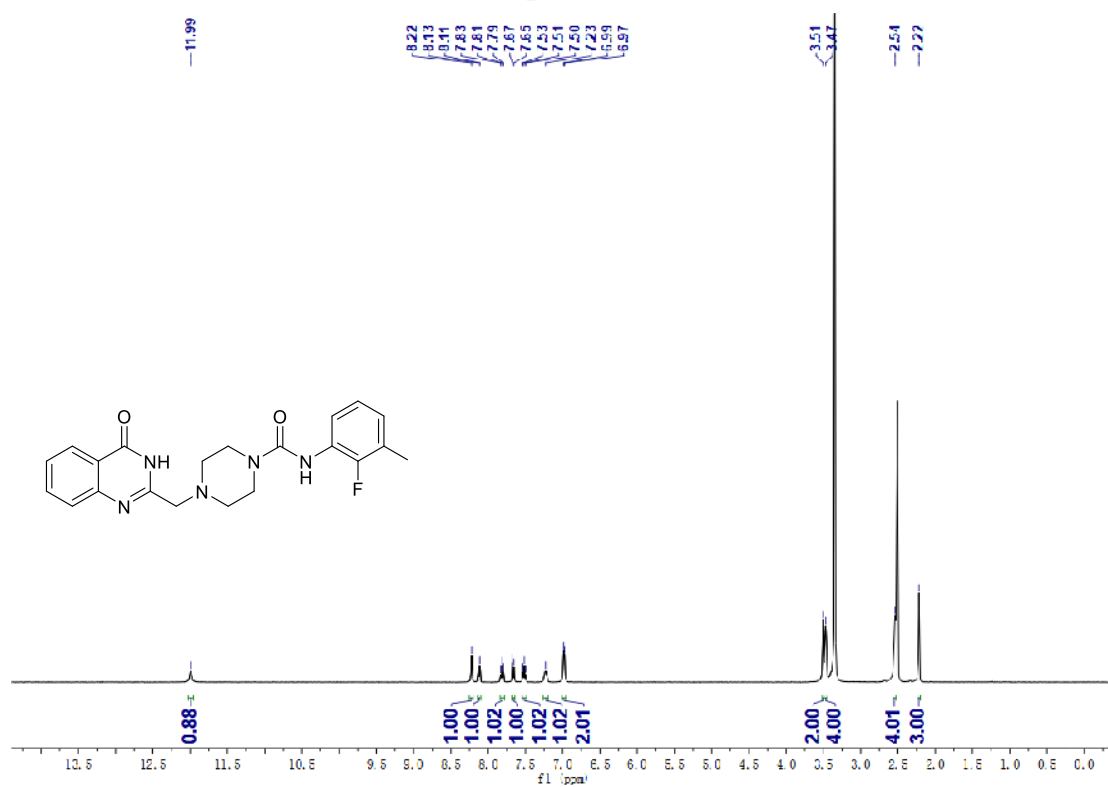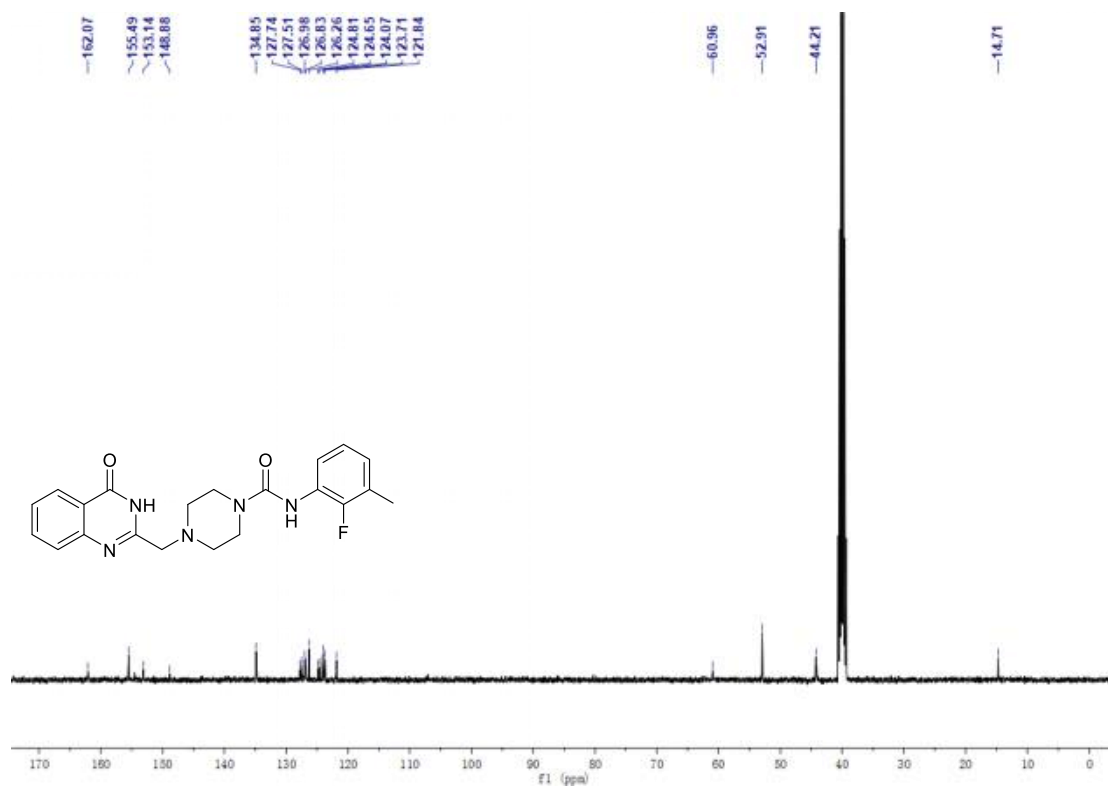

# 1.22 $^1\text{H}$ -NMR and $^{13}\text{C}$ -NMR (DMSO- $d_6$ ) spectrum of A22

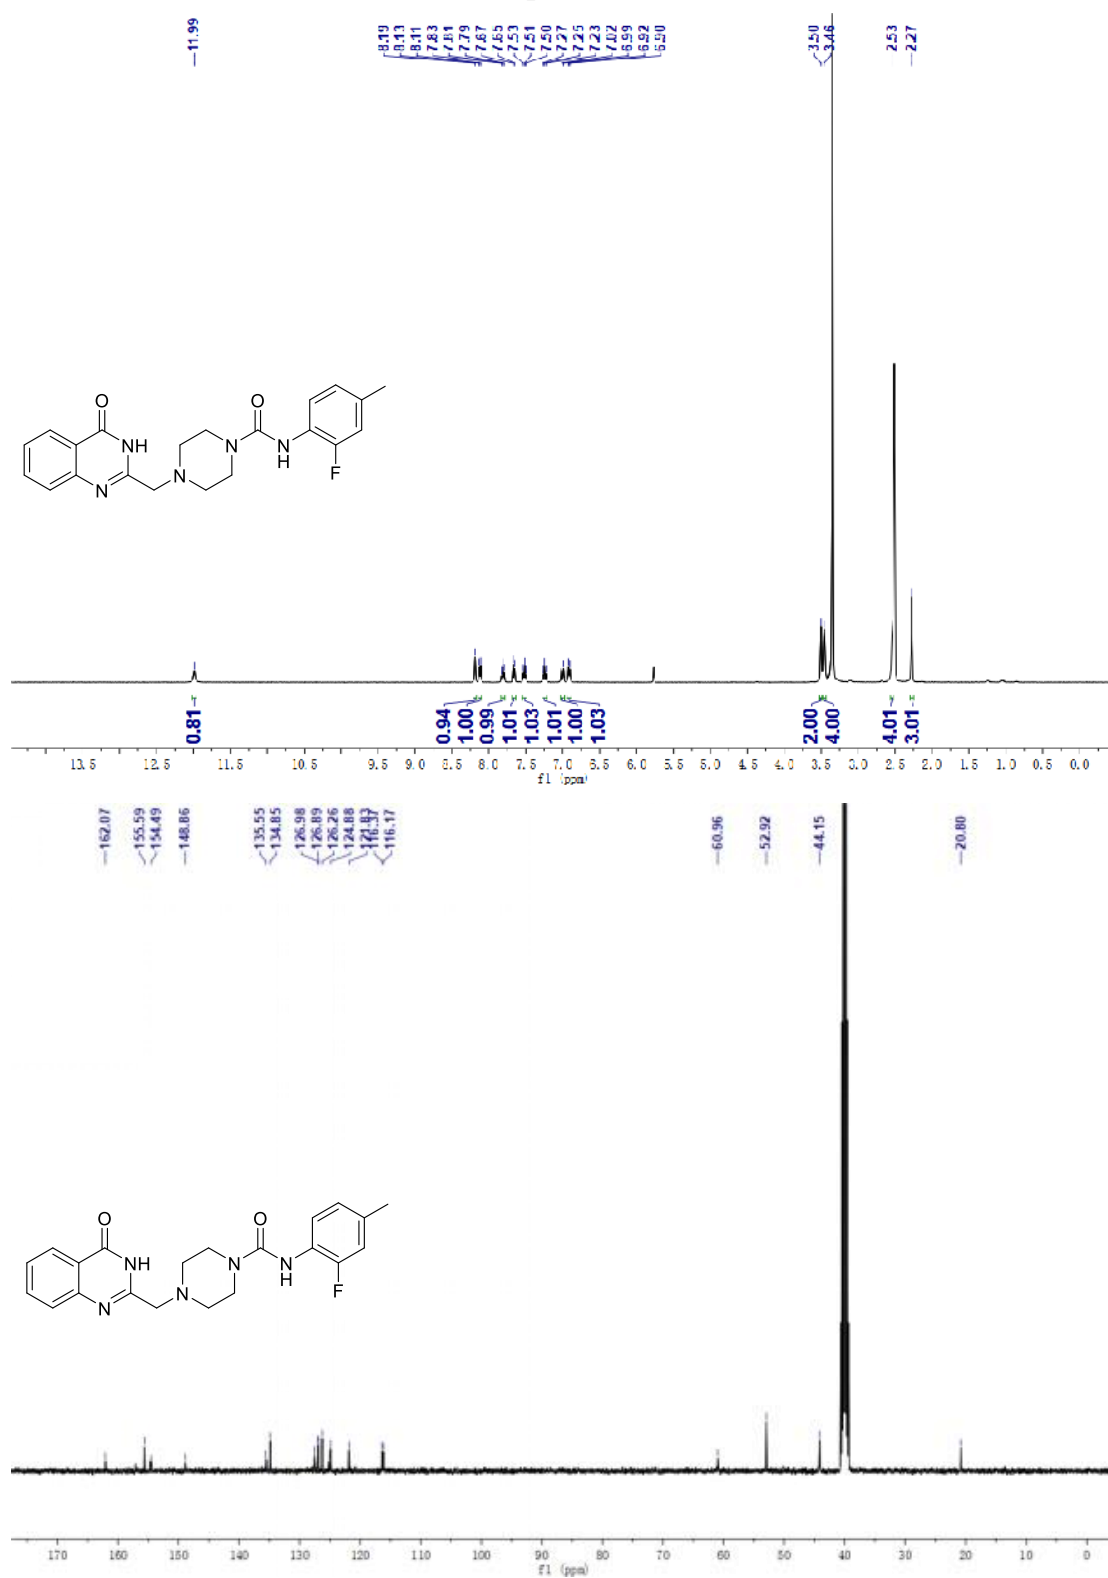

### 1.23 $^1\text{H}$ -NMR and $^{13}\text{C}$ -NMR ( $\text{CDCl}_3$ ) spectrum of A23

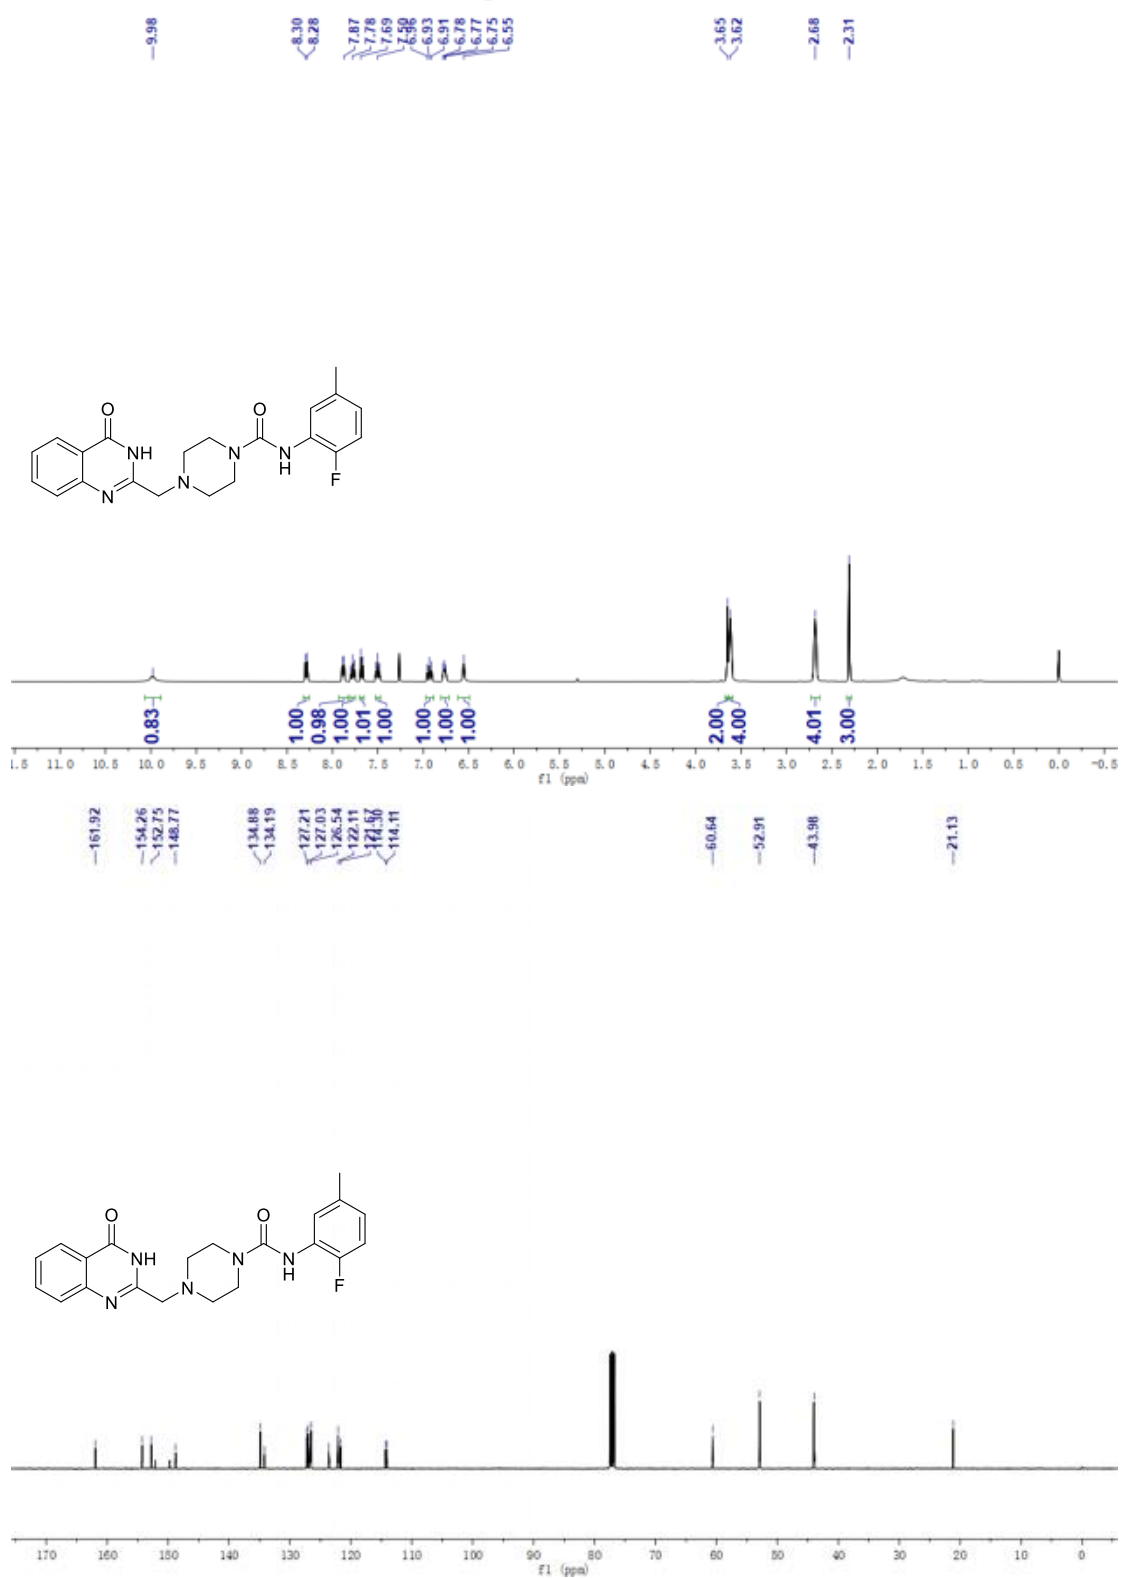

O=C1c2ccccc2n(C1CN3CCN(CCN3C(=O)Nc4ccc(F)c(C(F)(F)F)c4)c5ccccc5)c6ccccc6

**<sup>1</sup>H NMR (CDCl<sub>3</sub>)**

| Chemical Shift (ppm)         | Integration                  |
|------------------------------|------------------------------|
| 10.01                        | 0.89                         |
| 8.31, 8.29, 8.28             | 2.00                         |
| 7.78, 7.69, 7.51, 7.41, 7.35 | 1.00, 1.01, 1.01, 1.01, 0.92 |
| 3.66, 3.64                   | 2.00, 4.00                   |
| 2.70                         | 4.00                         |

**<sup>13</sup>C NMR (CDCl<sub>3</sub>)**

| Chemical Shift (ppm)                                           |
|----------------------------------------------------------------|
| 161.77                                                         |
| 153.40, 152.61, 152.46, 150.20, 148.74                         |
| 134.94, 130.71, 127.23, 127.11, 126.60, 121.95, 121.70, 120.83 |
| 112.22                                                         |
| 60.60, 52.87, 44.02                                            |

# 1.25 $^1\text{H}$ -NMR and $^{13}\text{C}$ -NMR ( $\text{CDCl}_3$ ) spectrum of A25

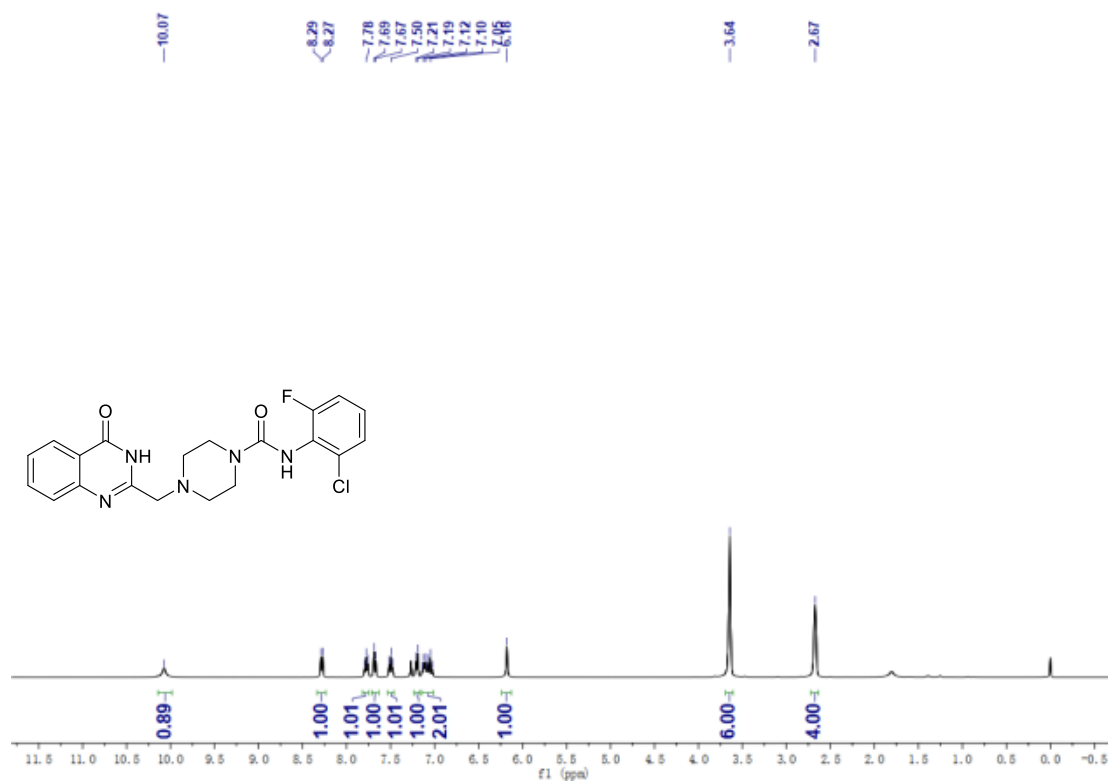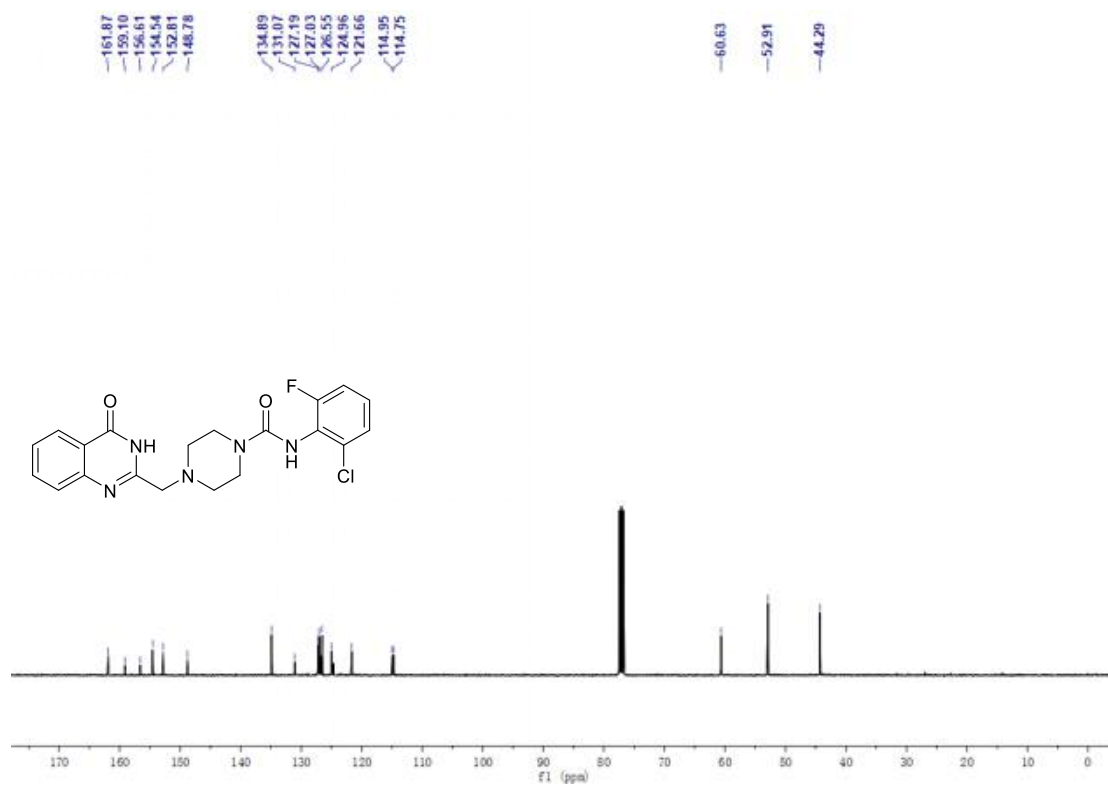

# 1.26 $^1\text{H}$ -NMR and $^{13}\text{C}$ -NMR ( $\text{CDCl}_3$ ) spectrum of A26

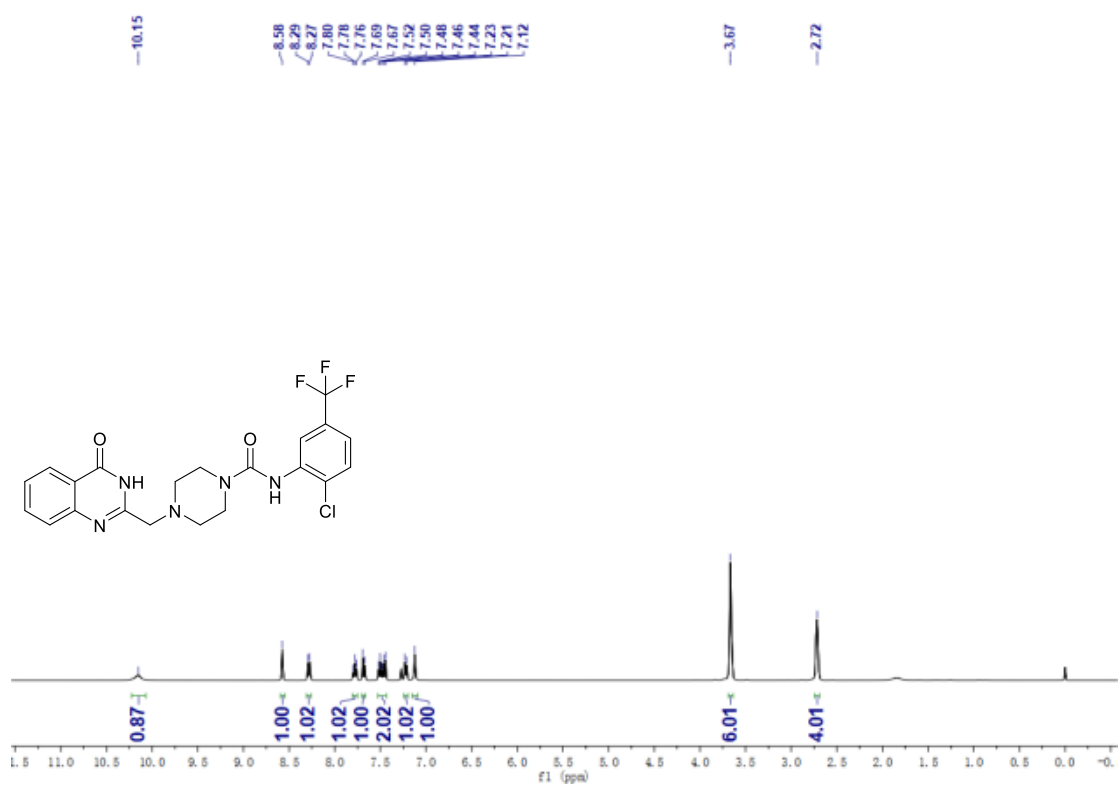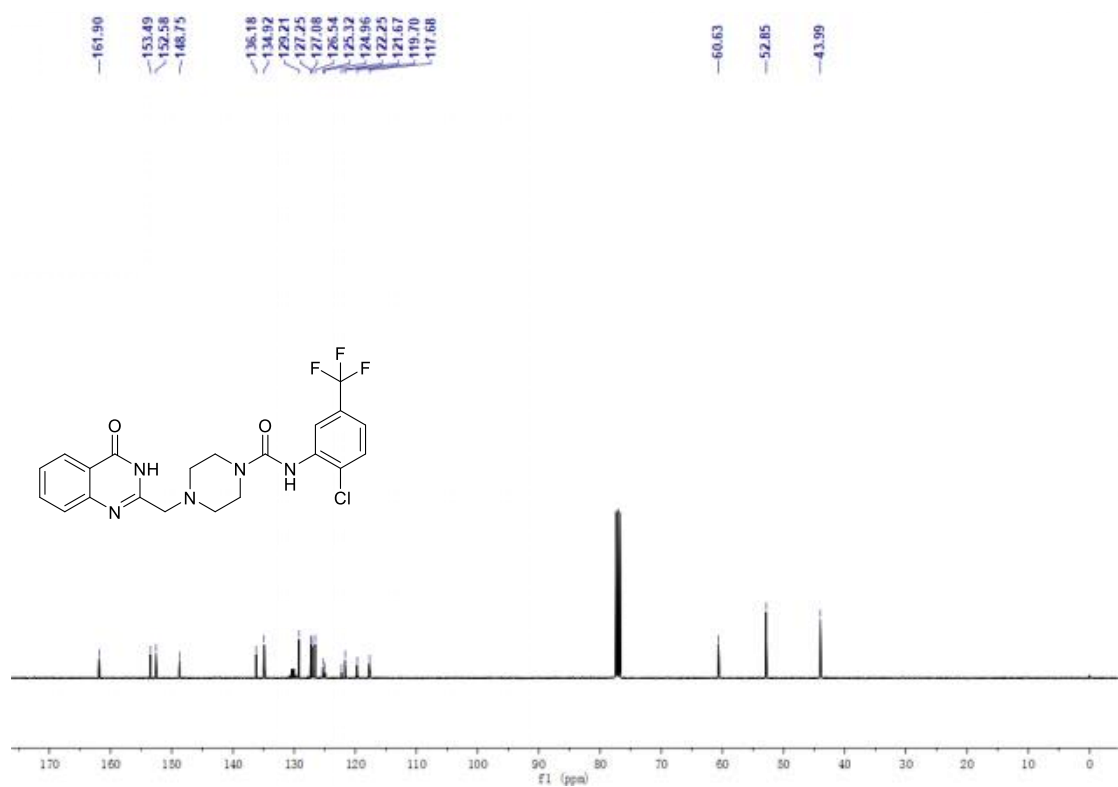

# 1.27 $^1\text{H}$ -NMR and $^{13}\text{C}$ -NMR ( $\text{CDCl}_3$ ) spectrum of A27

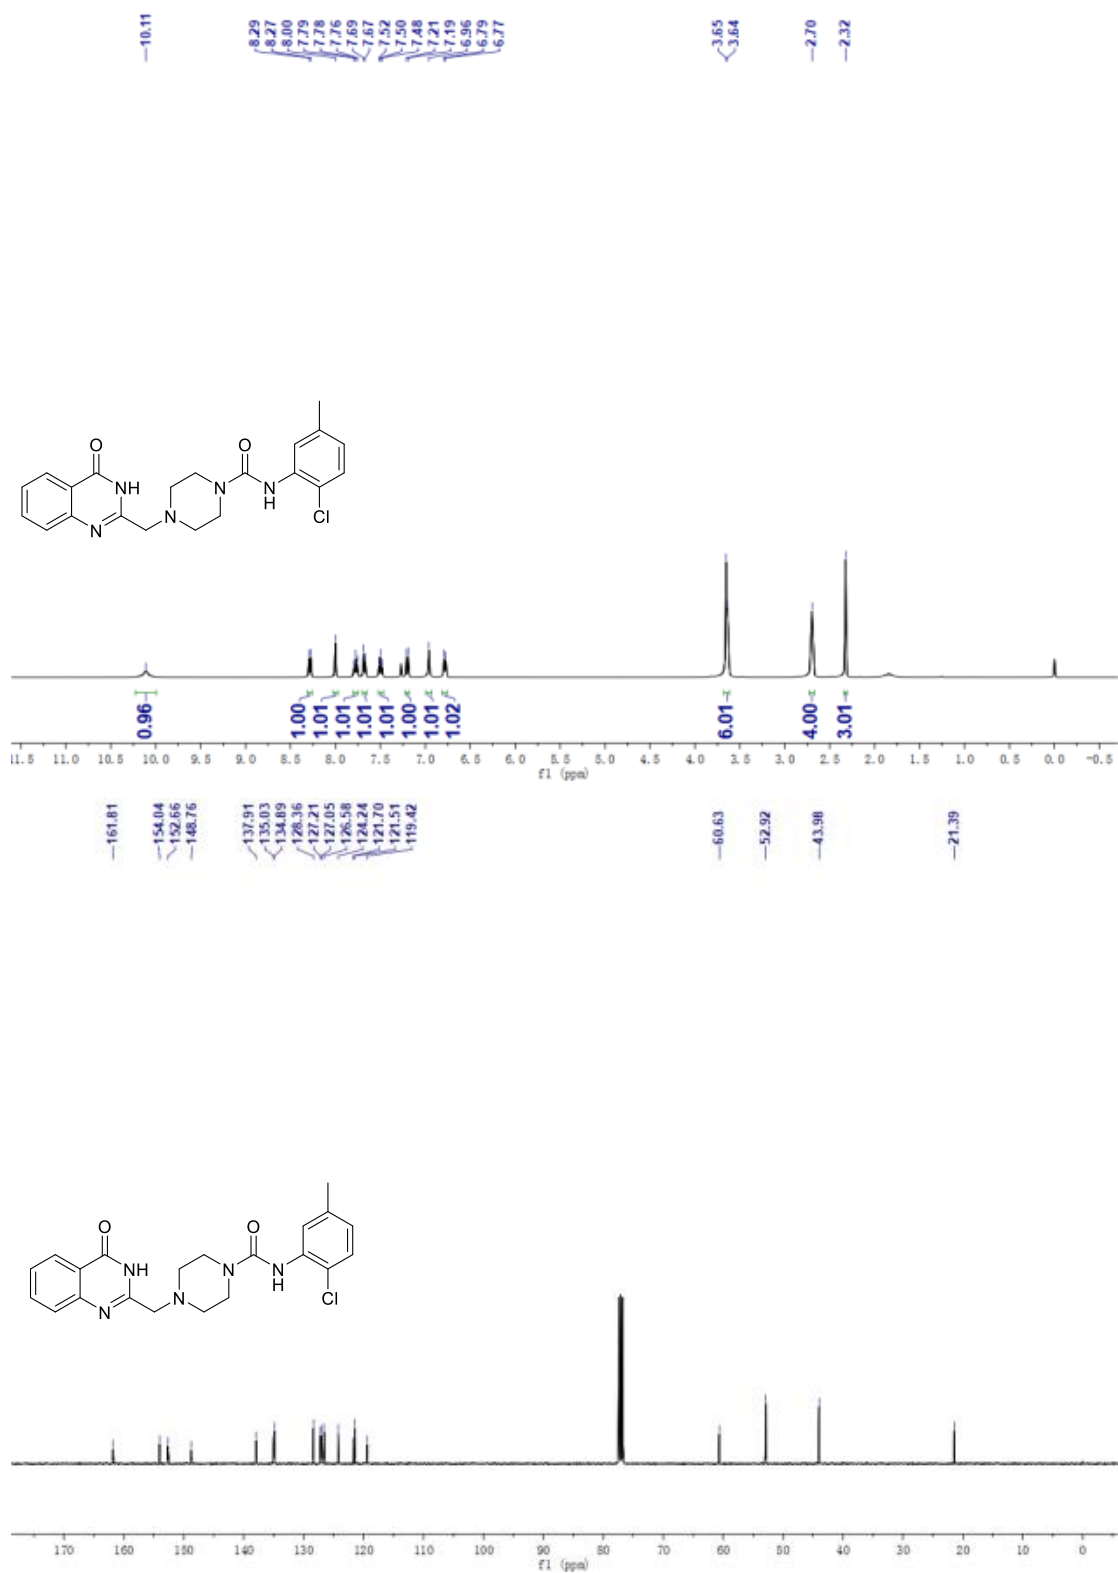

# 1.28 $^1\text{H}$ -NMR and $^{13}\text{C}$ -NMR (DMSO- $d_6$ ) spectrum of A28

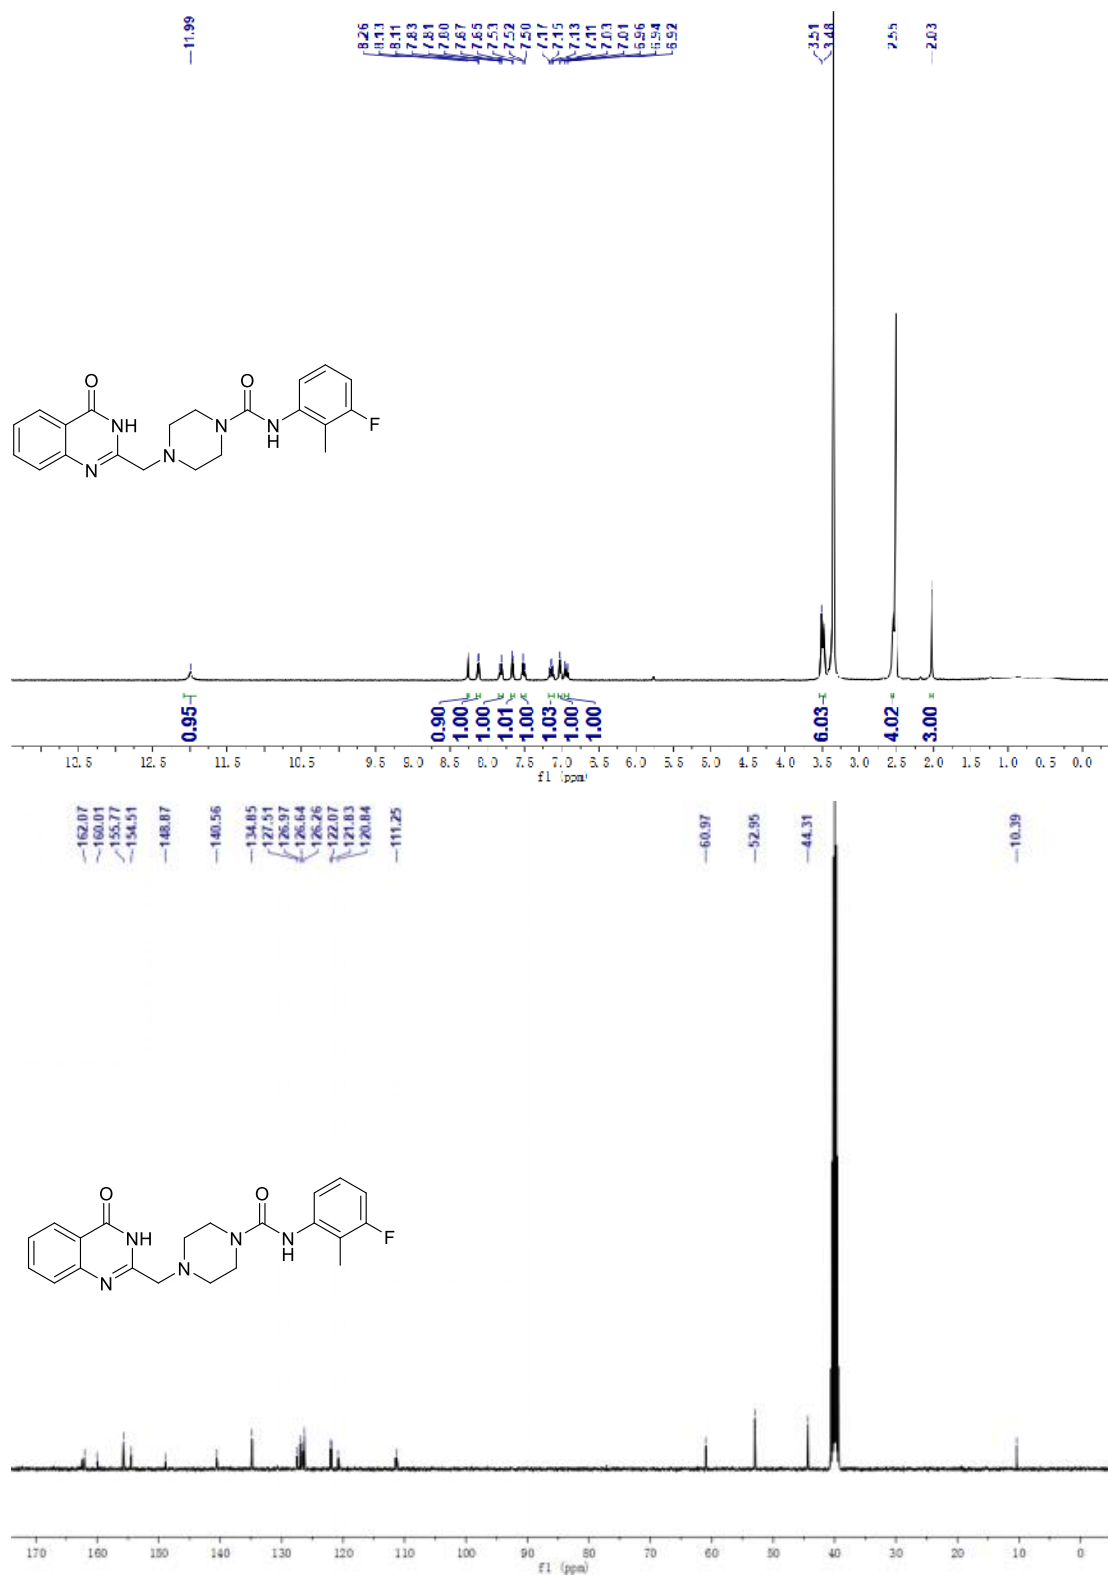

# 1.29 $^1\text{H}$ -NMR and $^{13}\text{C}$ -NMR (DMSO- $d_6$ ) spectrum of A29

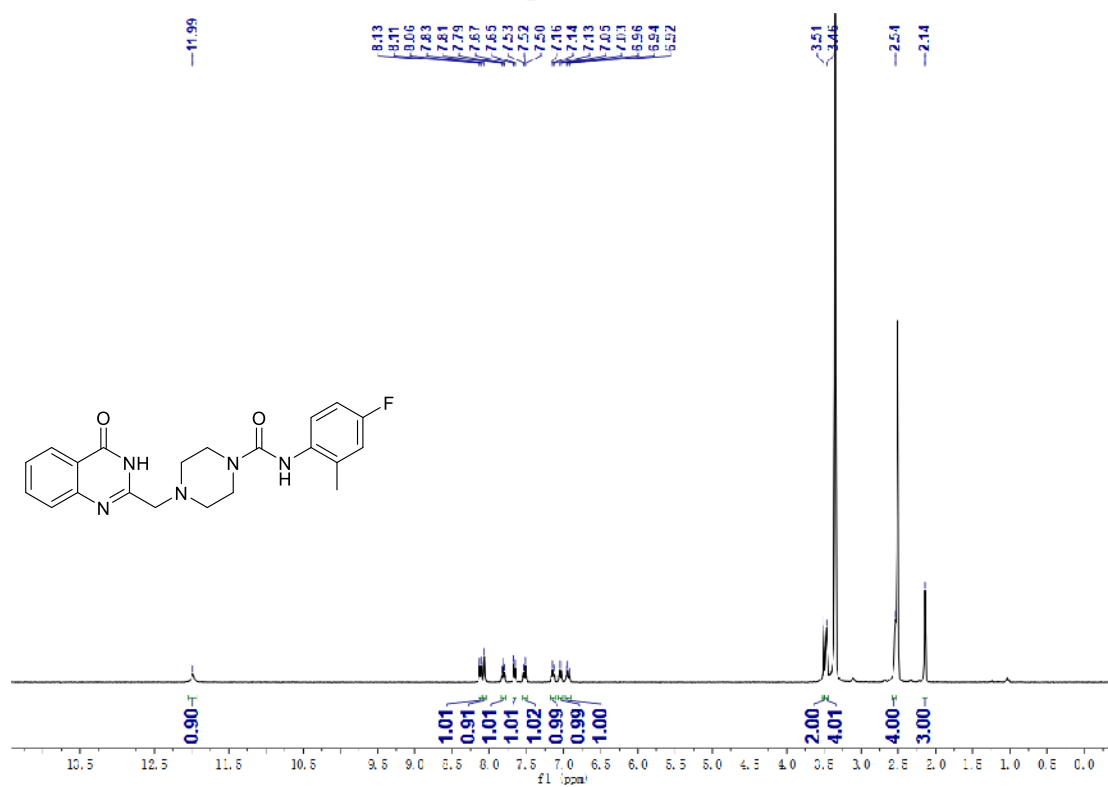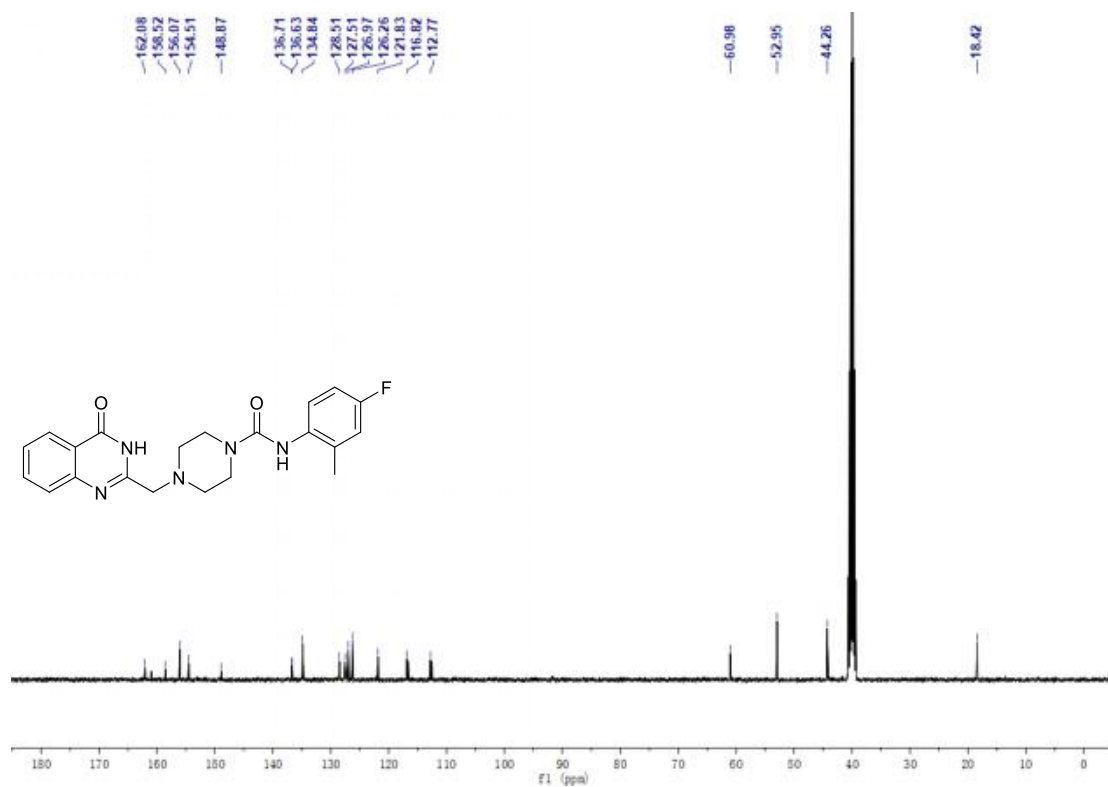

### 1.30 $^1\text{H}$ -NMR and $^{13}\text{C}$ -NMR ( $\text{CDCl}_3$ ) spectrum of A30

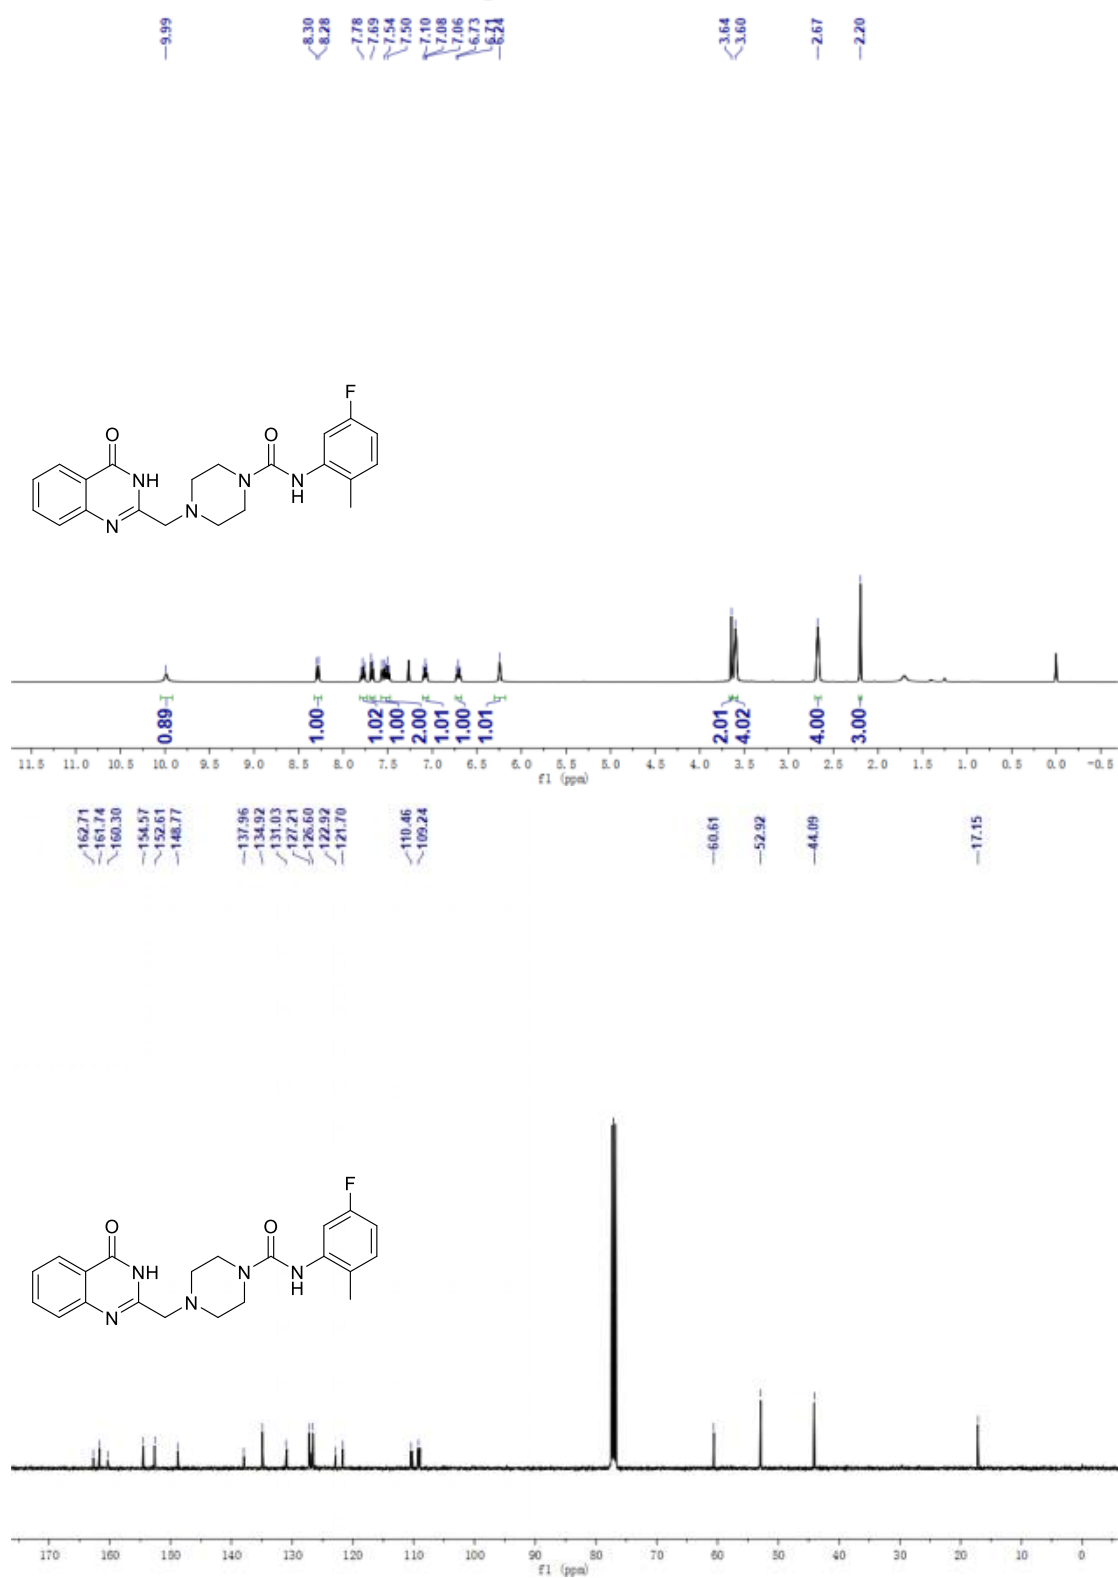

### 1.31 $^1\text{H}$ -NMR and $^{13}\text{C}$ -NMR (DMSO- $d_6$ ) spectrum of A31

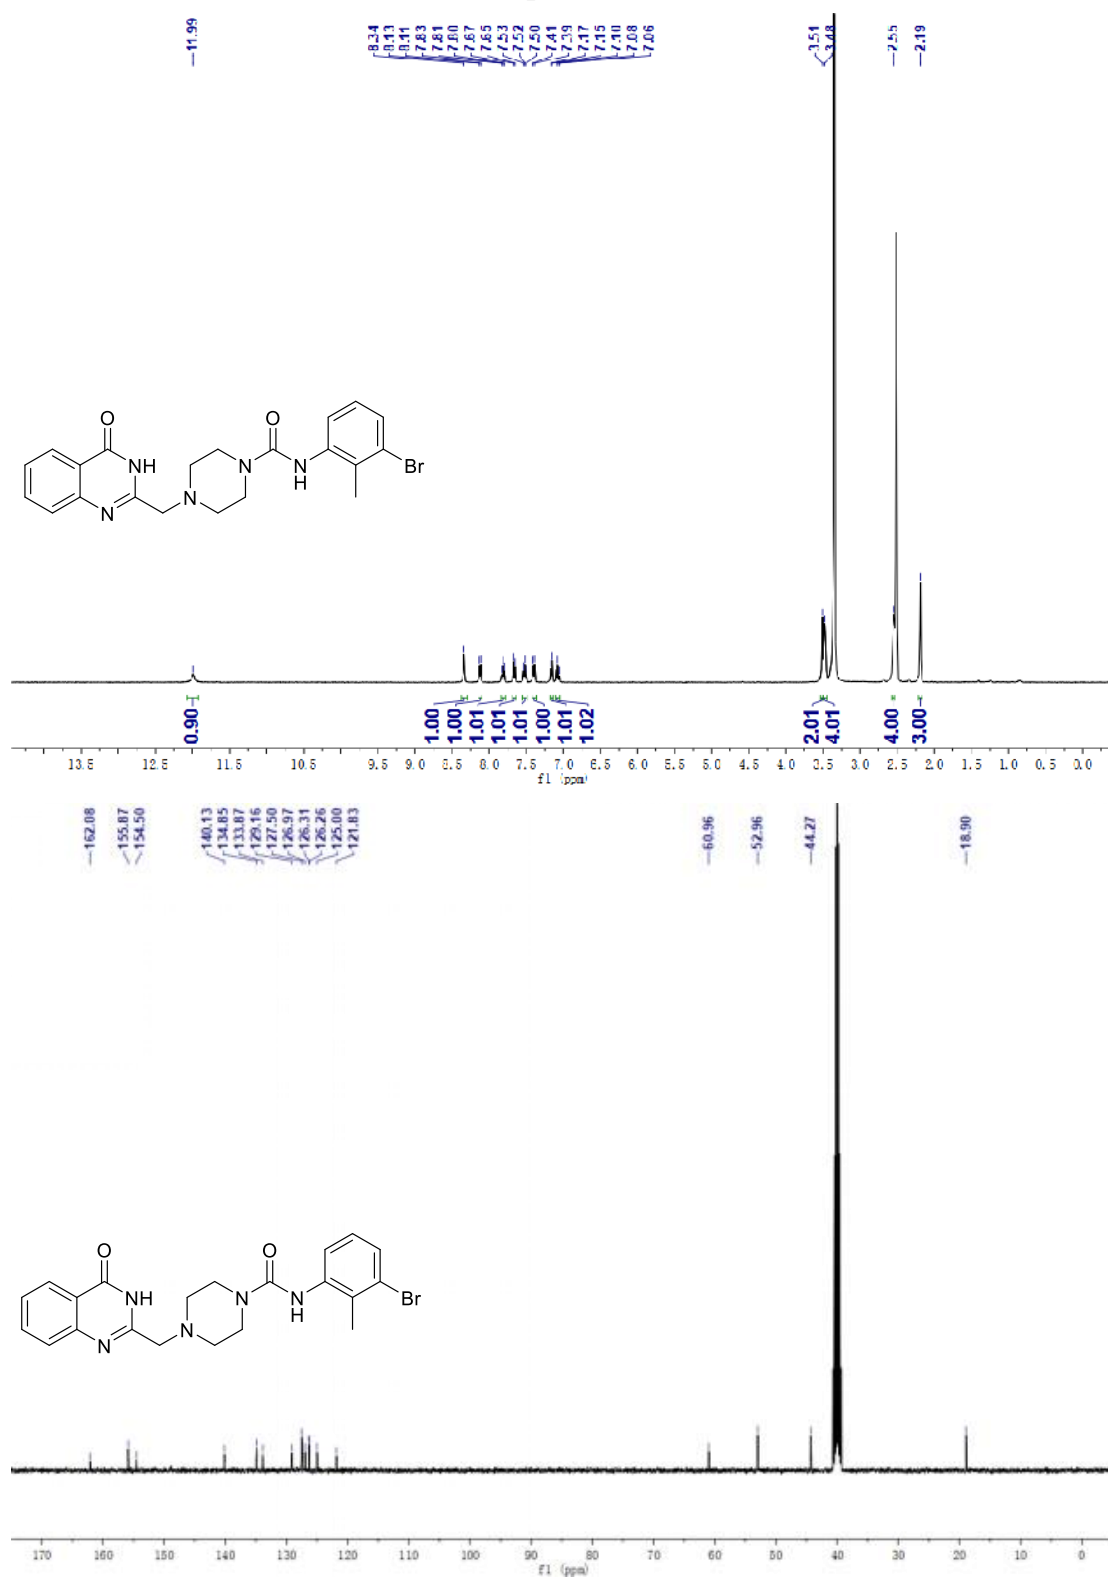

### 1.32 $^1\text{H}$ -NMR and $^{13}\text{C}$ -NMR (DMSO- $d_6$ ) spectrum of A32

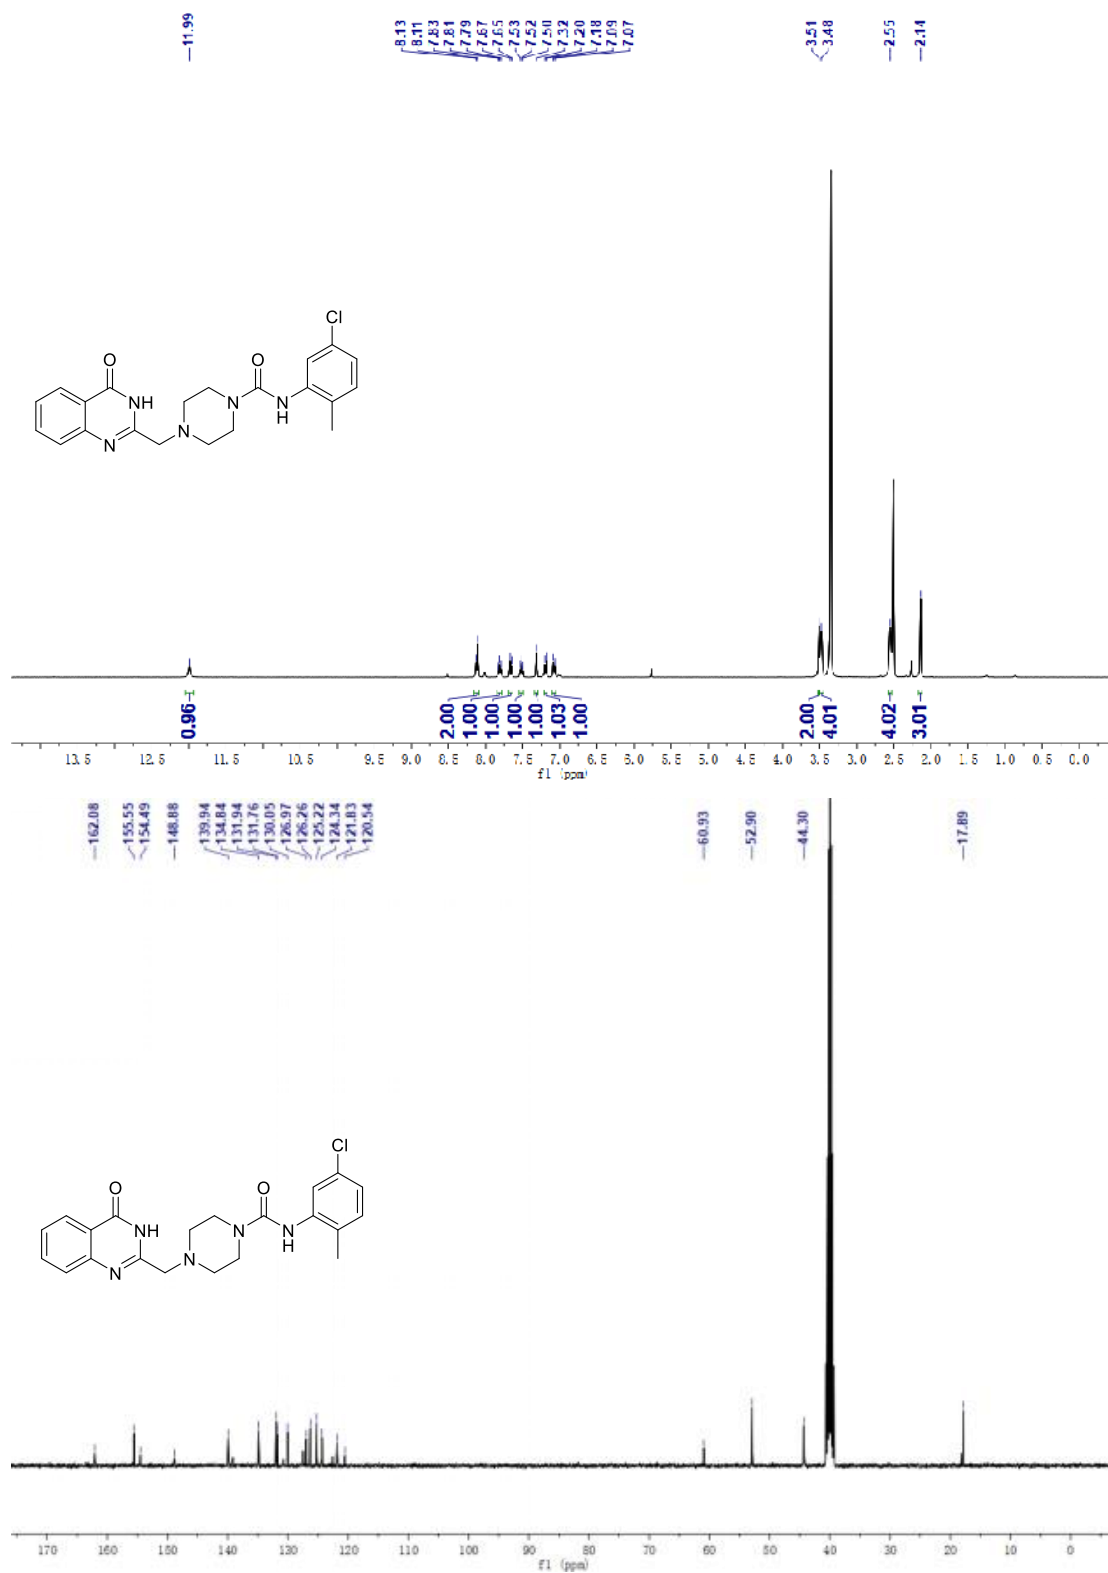

### 1.33 $^1\text{H}$ -NMR and $^{13}\text{C}$ -NMR (DMSO- $d_6$ ) spectrum of A33

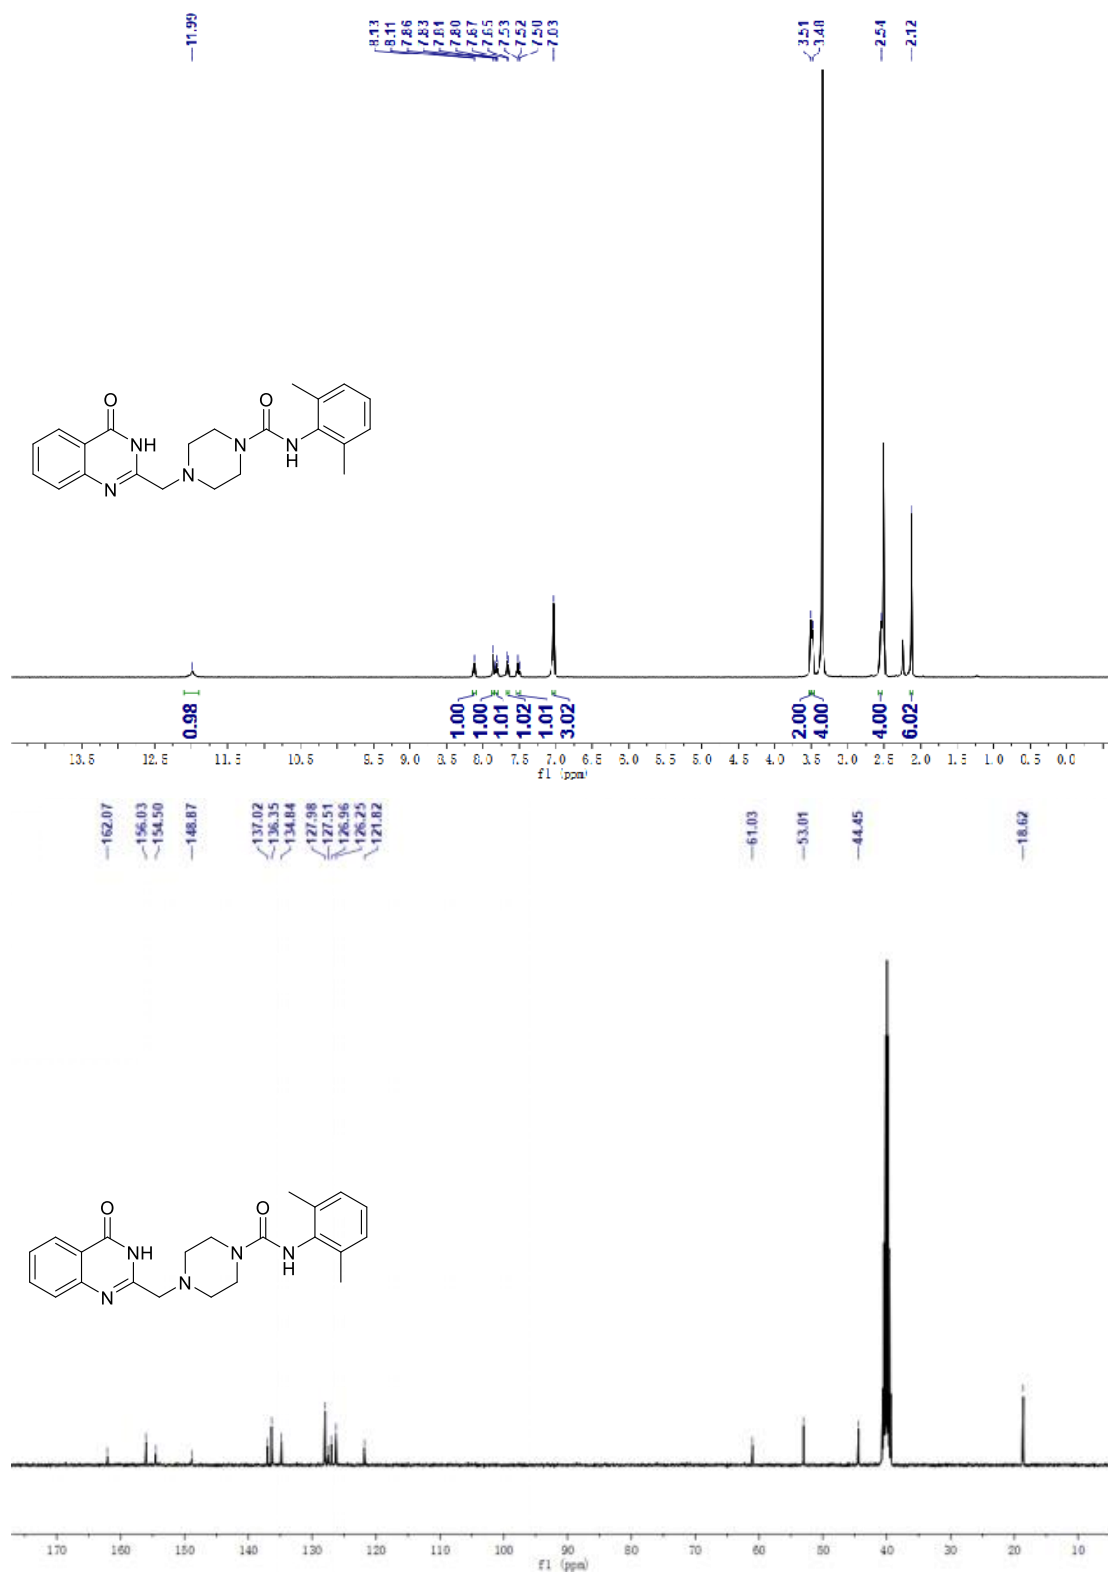

### 1.34 $^1\text{H}$ -NMR and $^{13}\text{C}$ -NMR (DMSO- $d_6$ ) spectrum of A34

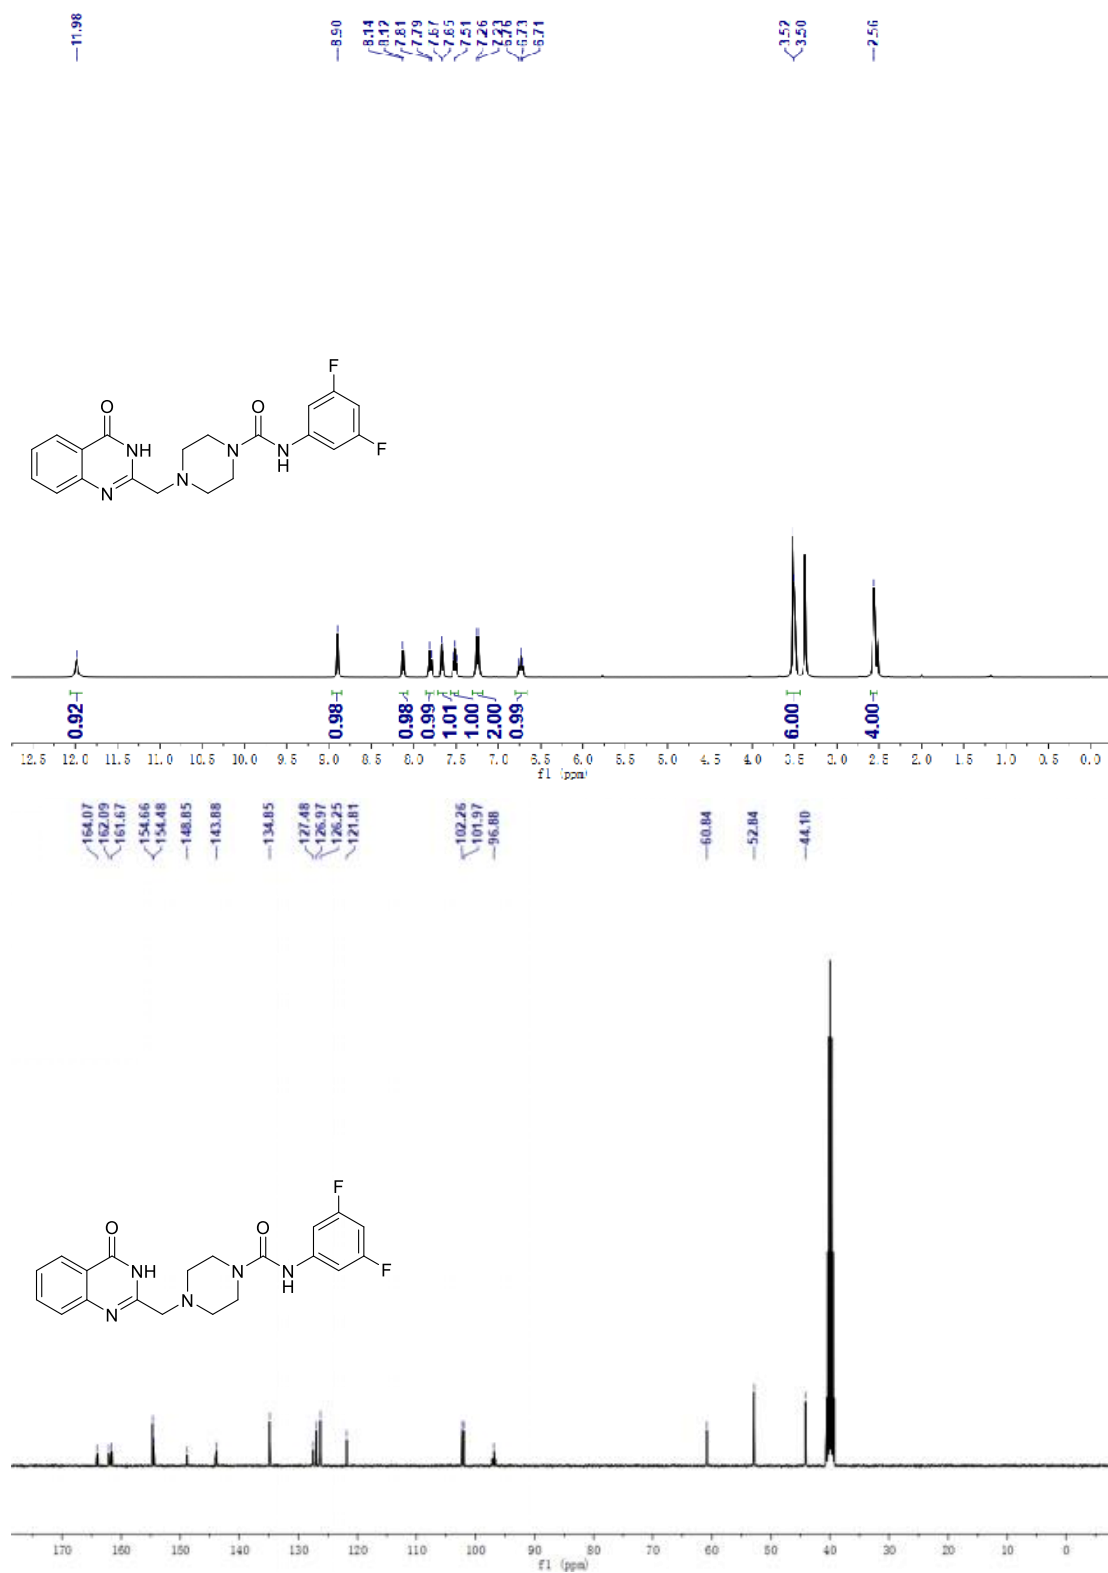

### 1.35 $^1\text{H}$ -NMR and $^{13}\text{C}$ -NMR (DMSO- $d_6$ ) spectrum of A35

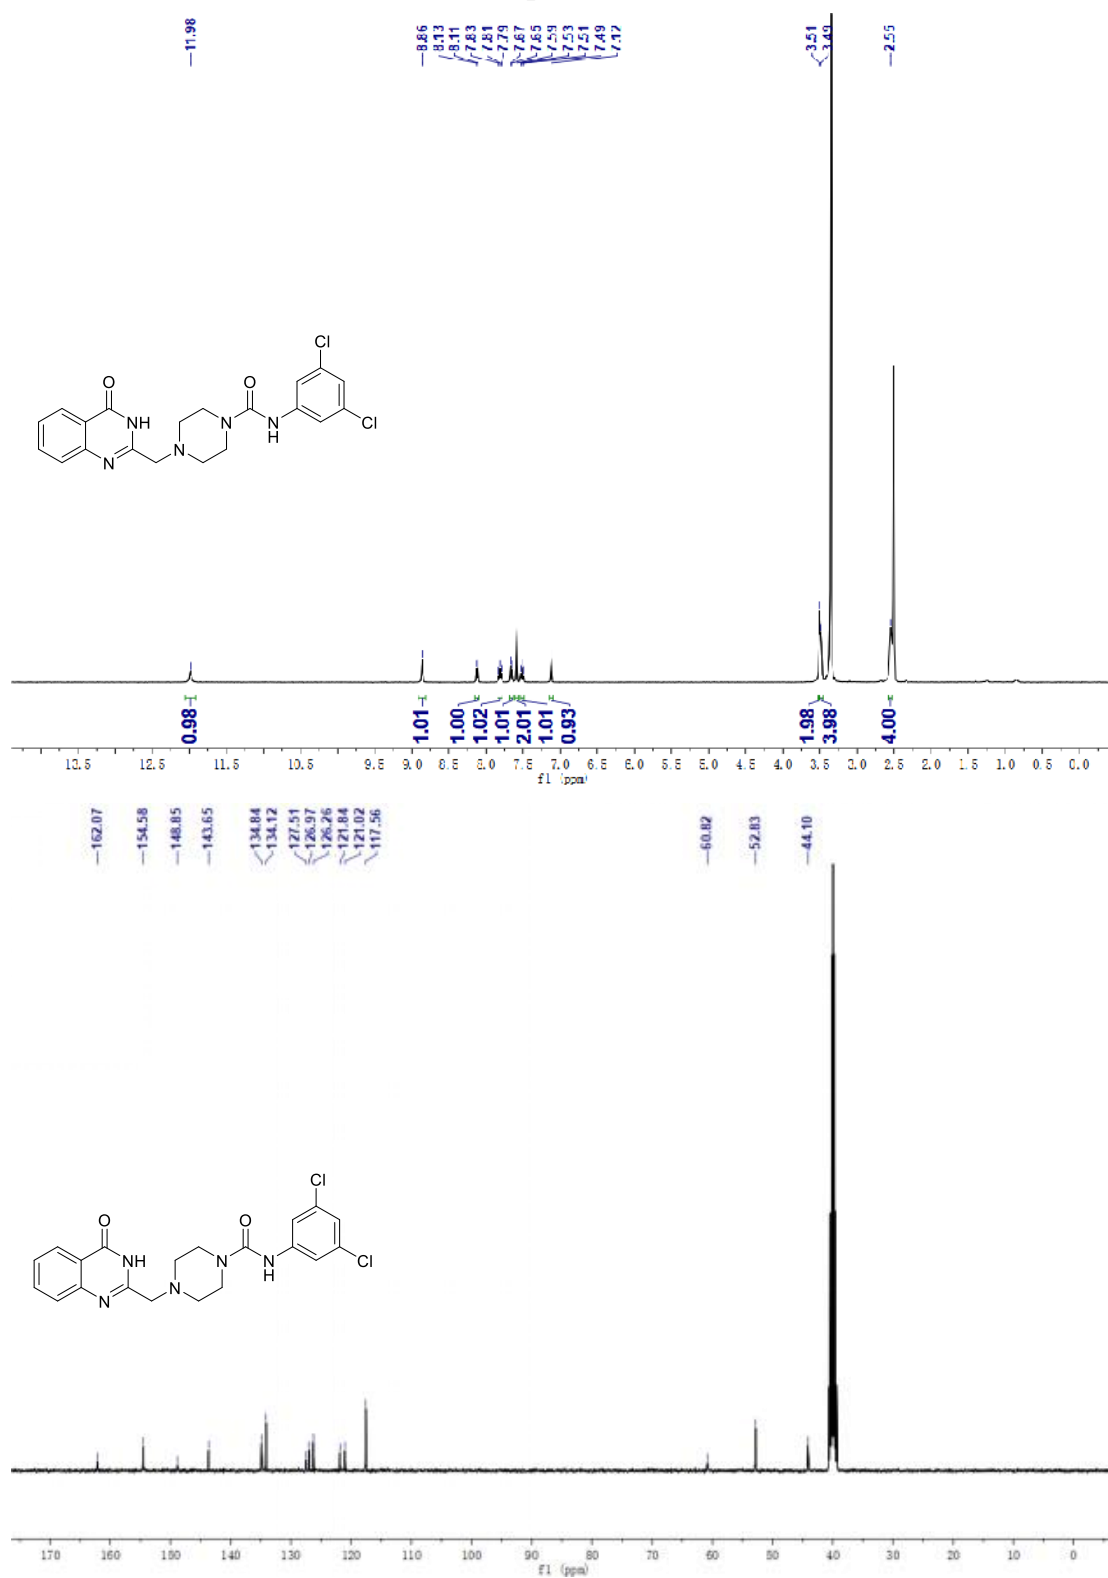

### 1.36 $^1\text{H}$ -NMR and $^{13}\text{C}$ -NMR (DMSO- $d_6$ ) spectrum of A36

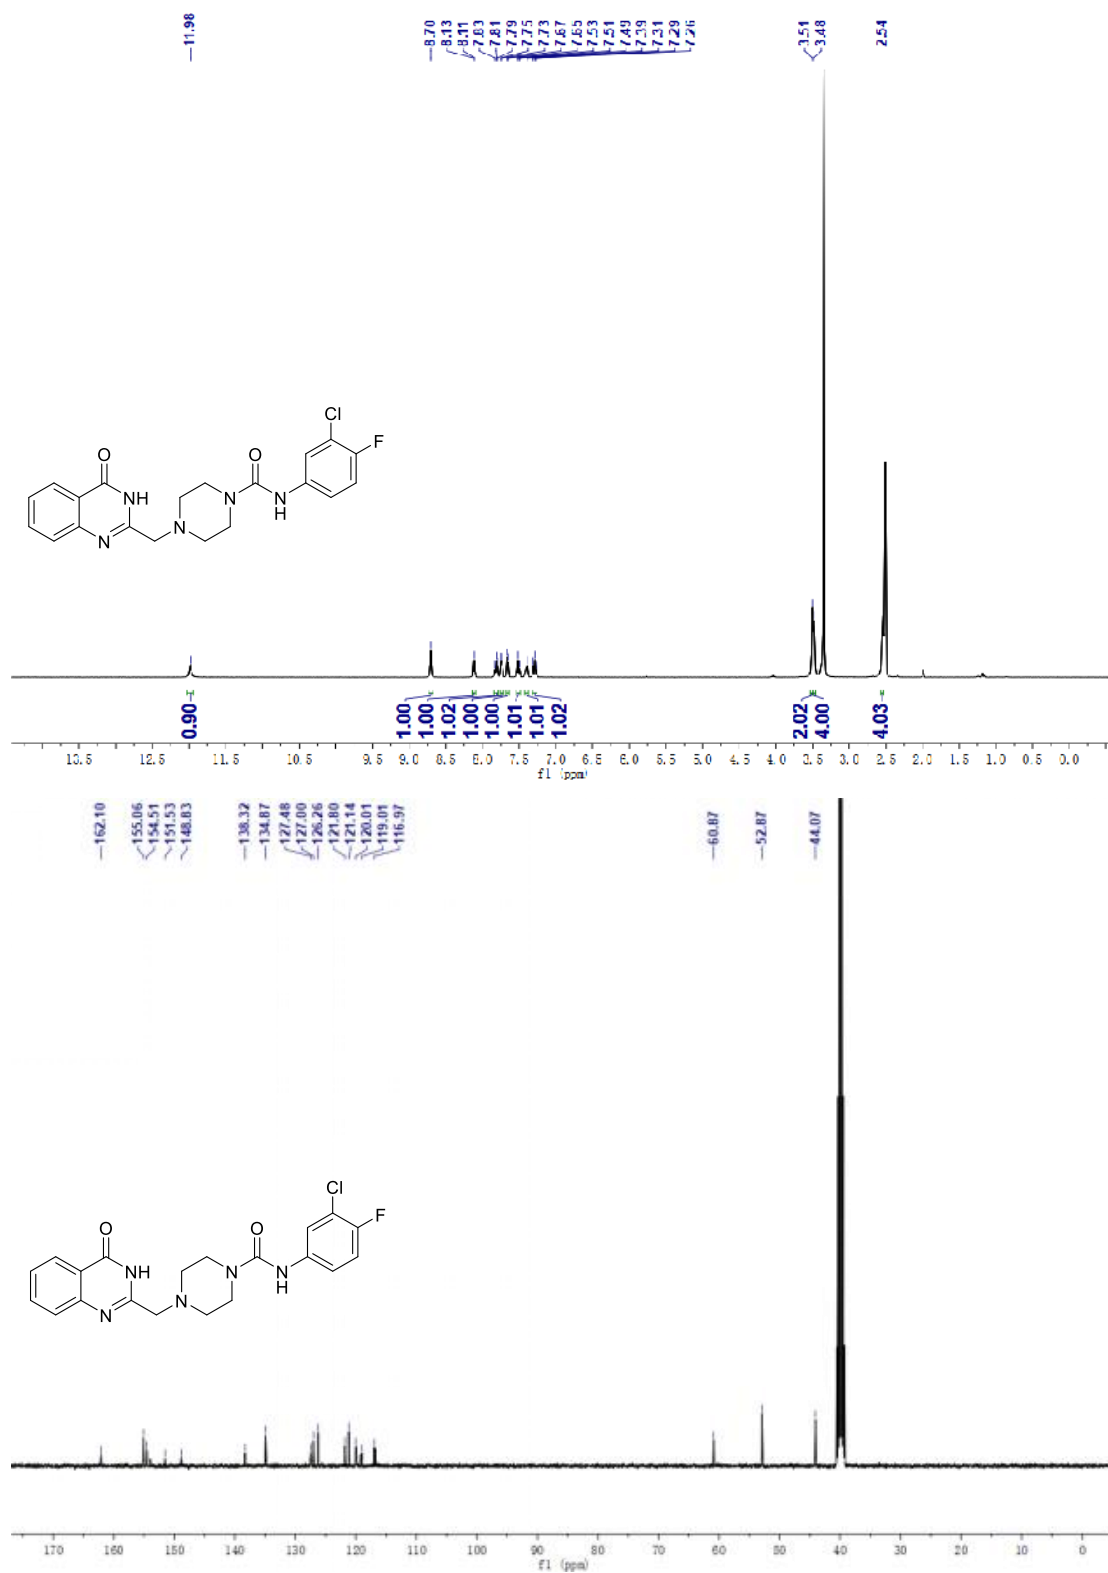

1.37  $^1\text{H}$ -NMR and  $^{13}\text{C}$ -NMR (DMSO- $d_6$ ) spectrum of A37

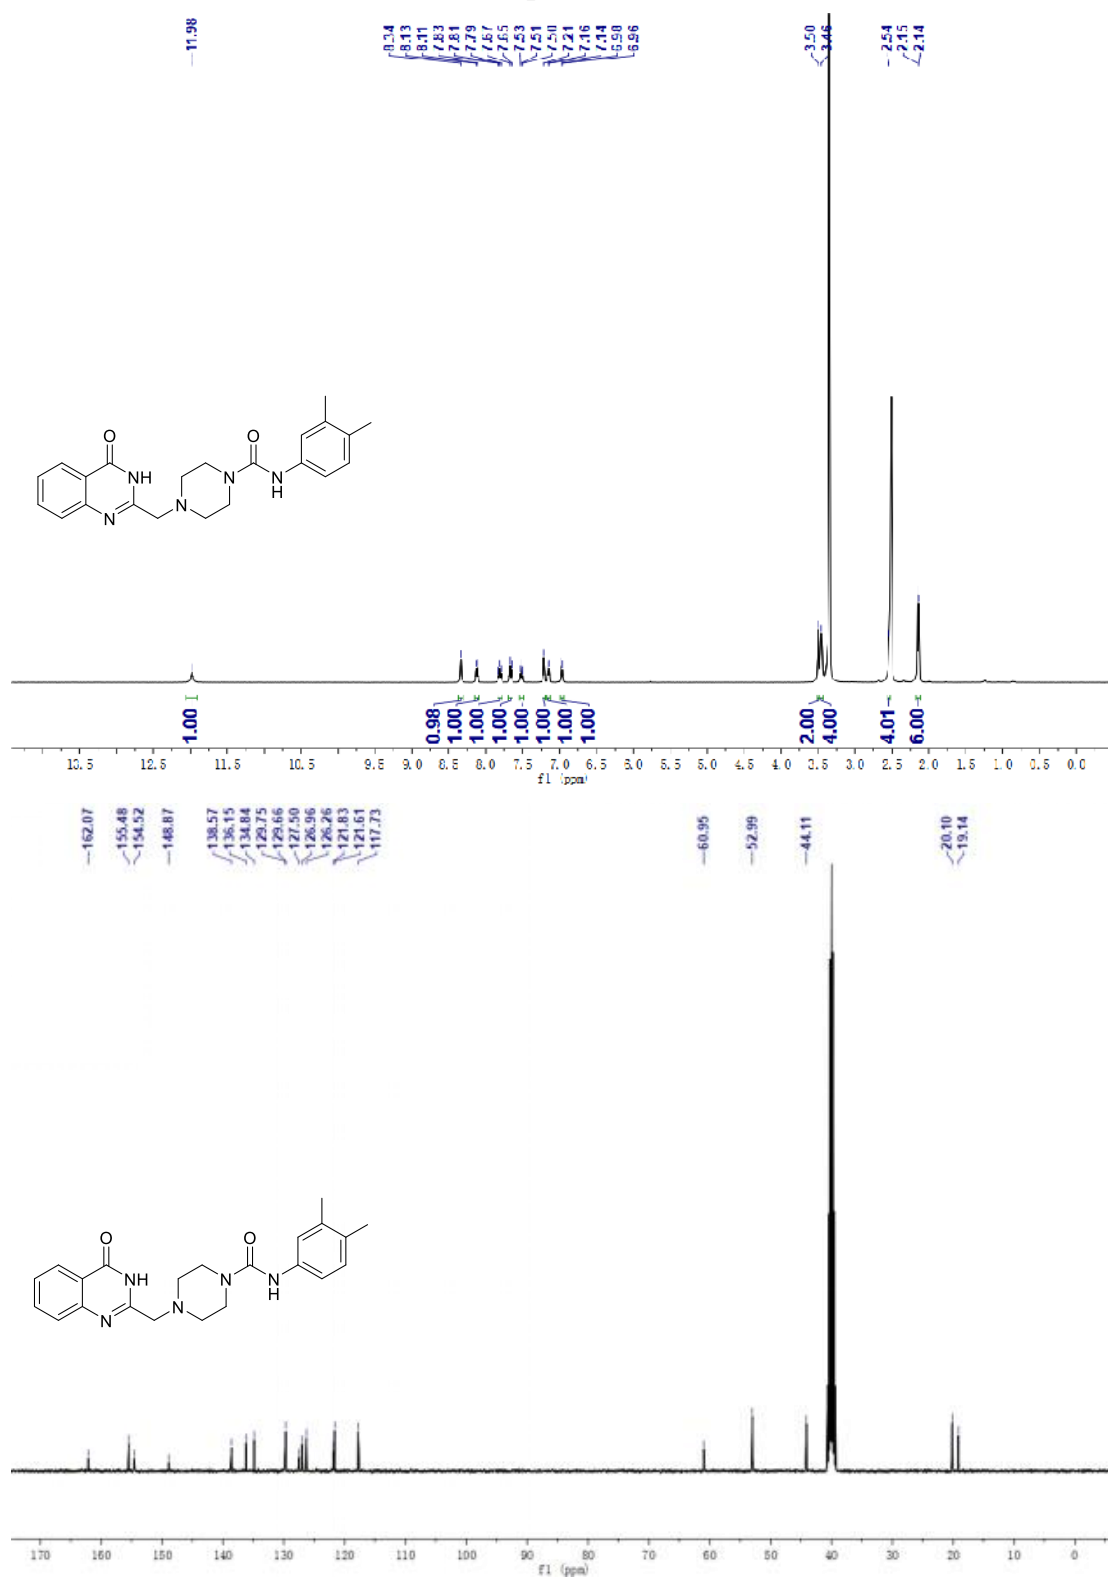

1.38  $^1\text{H}$ -NMR and  $^{13}\text{C}$ -NMR (DMSO- $d_6$ ) spectrum of A38

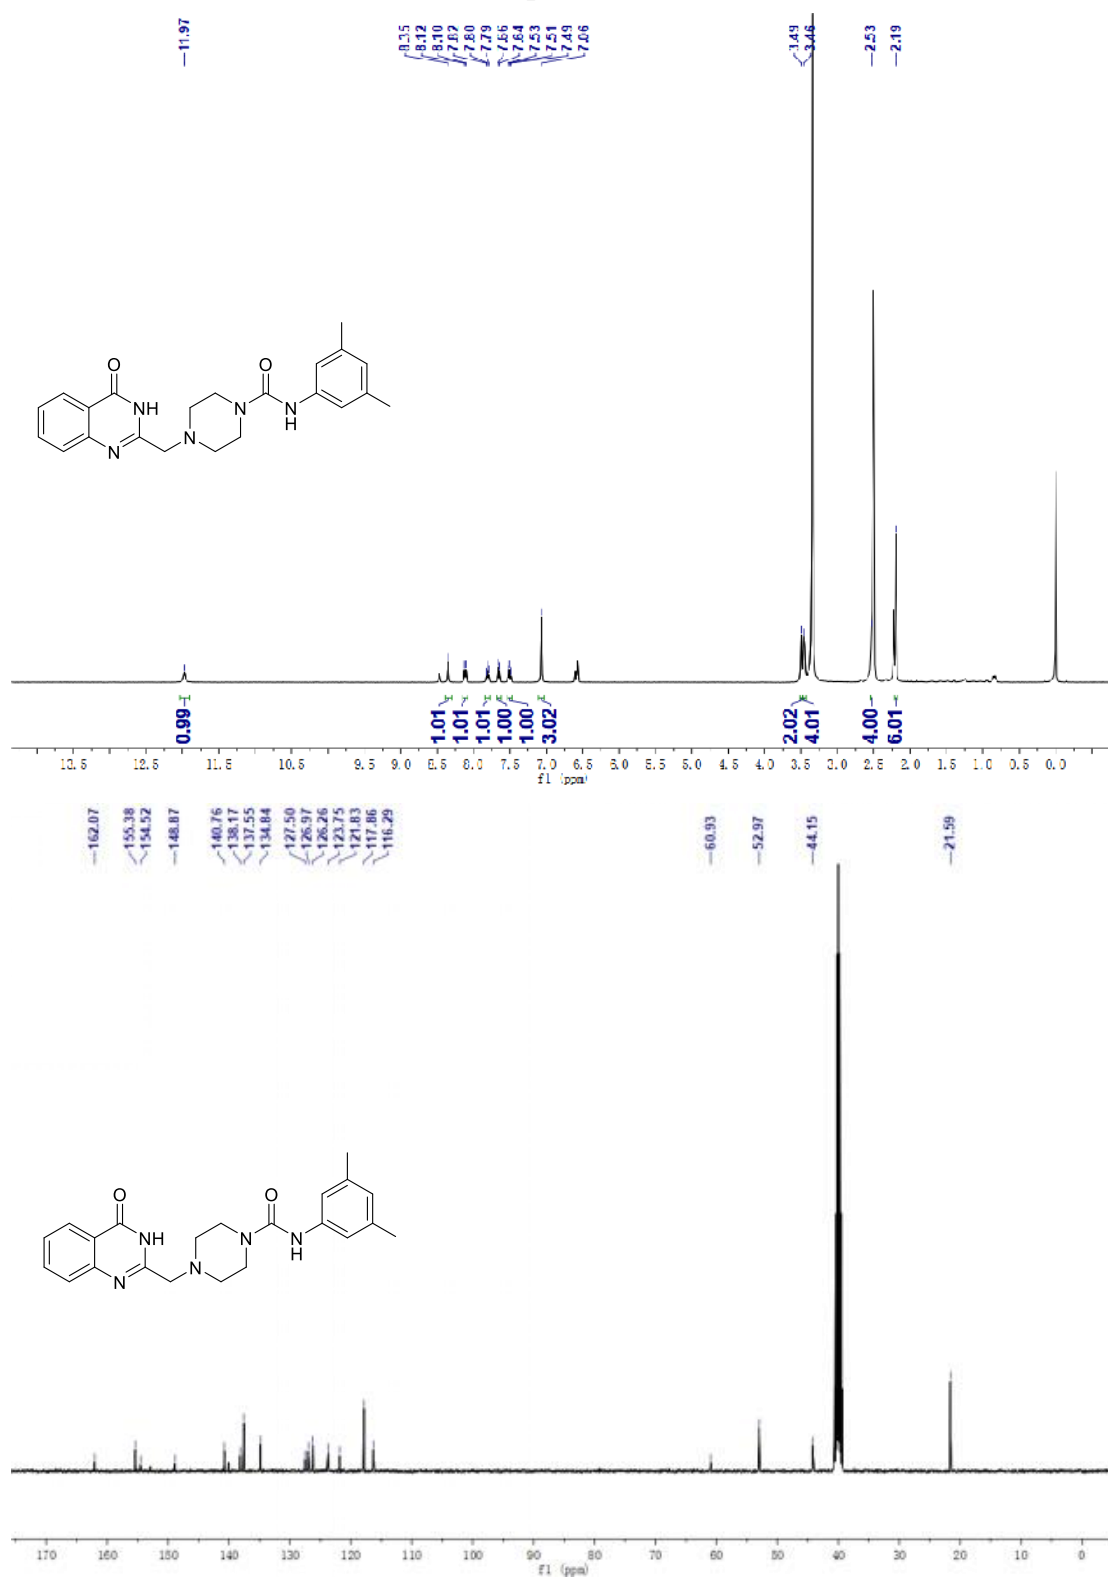

1.39  $^1\text{H}$ -NMR and  $^{13}\text{C}$ -NMR (DMSO- $d_6$ ) spectrum of A39

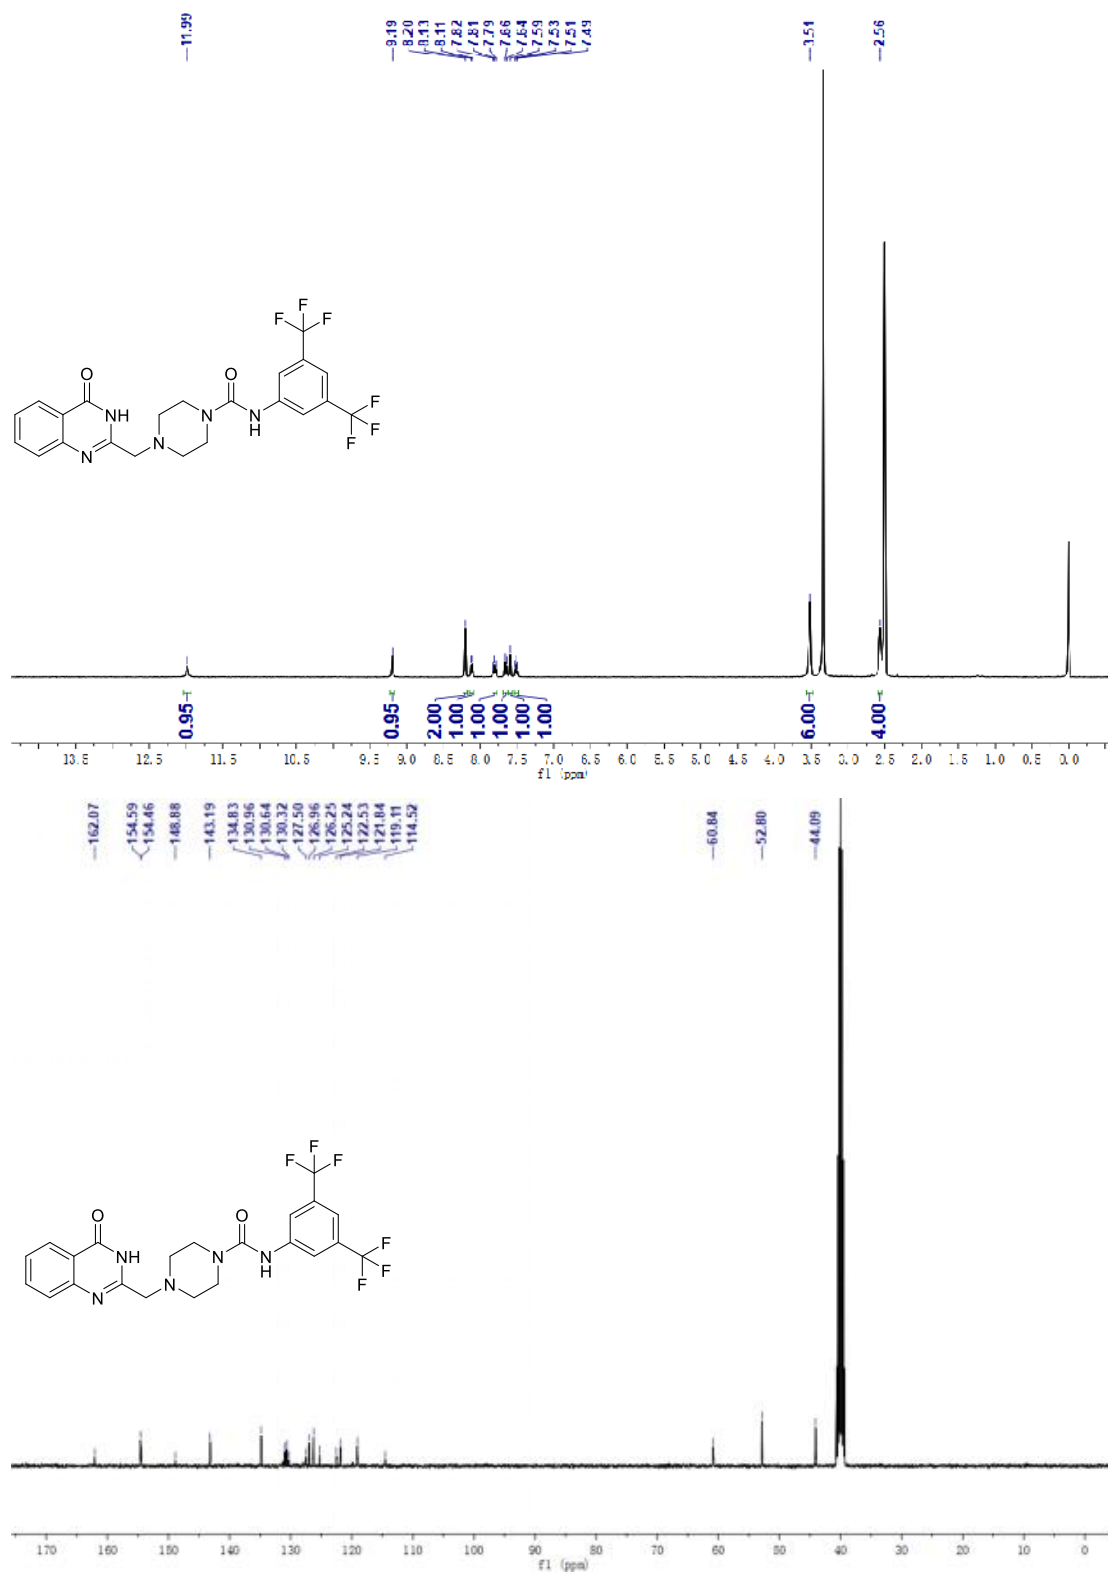

## 2.1 $^1\text{H}$ -NMR and $^{13}\text{C}$ -NMR (DMSO- $d_6$ ) spectrum of B1

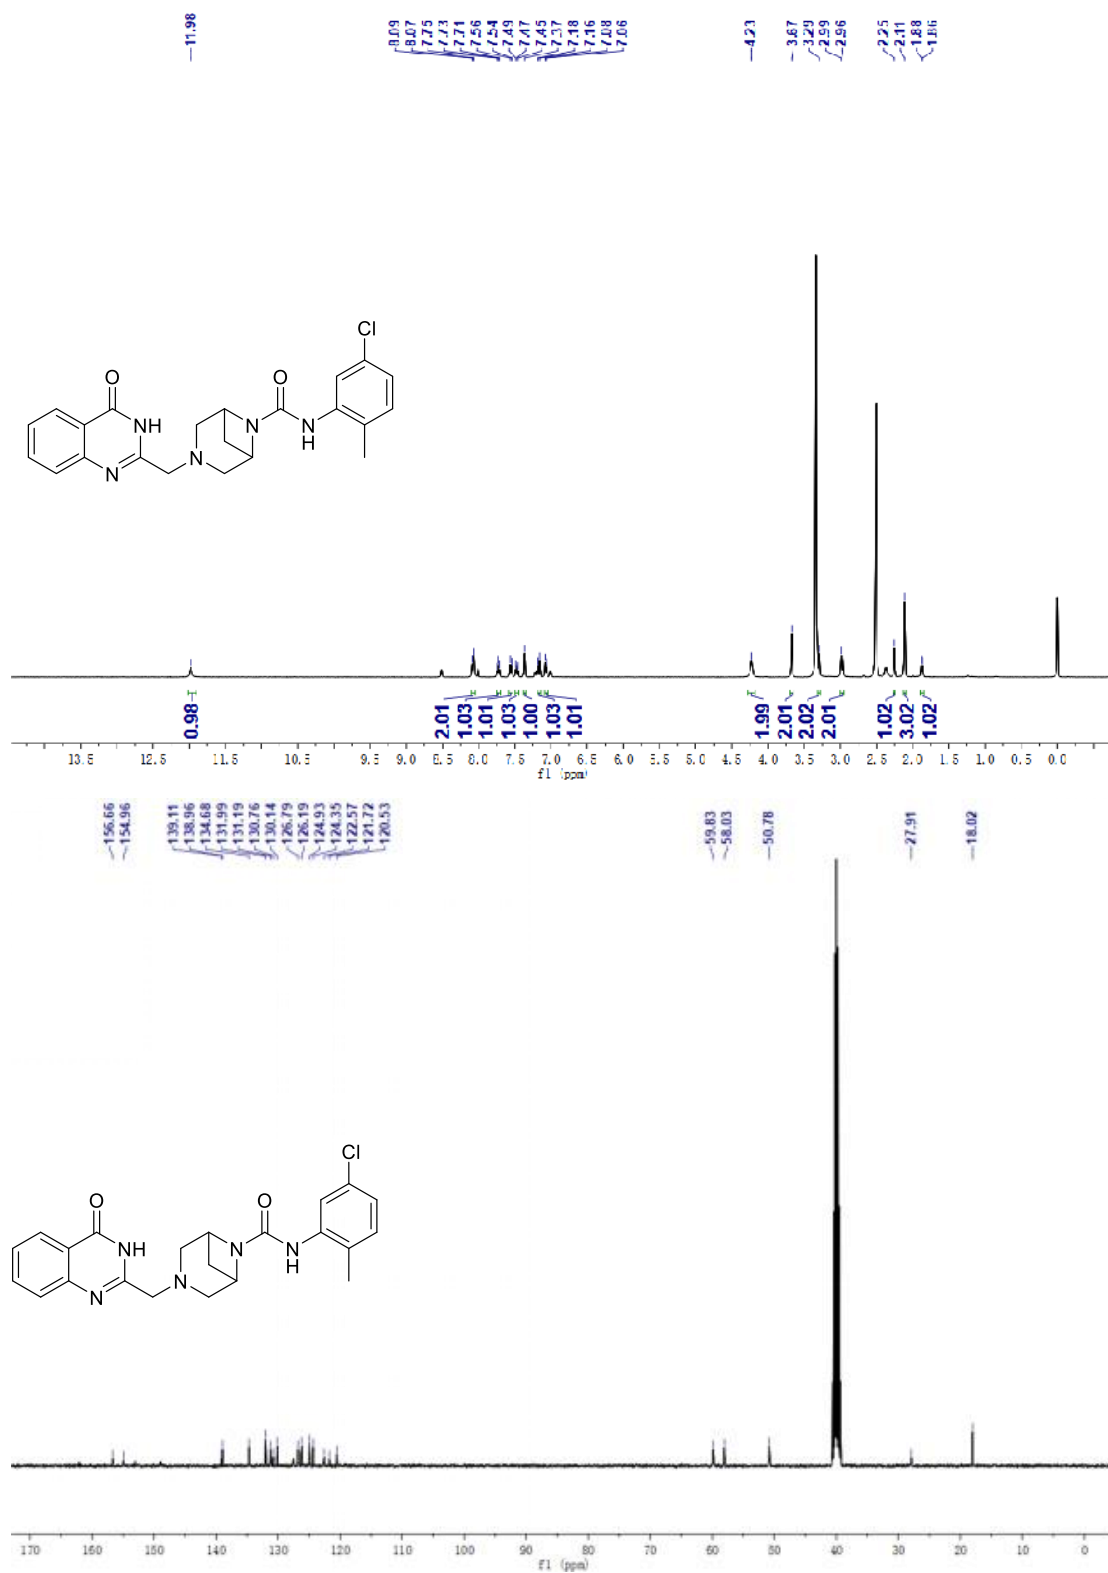

## 2.2 $^1\text{H}$ -NMR and $^{13}\text{C}$ -NMR (DMSO- $d_6$ ) spectrum of B2

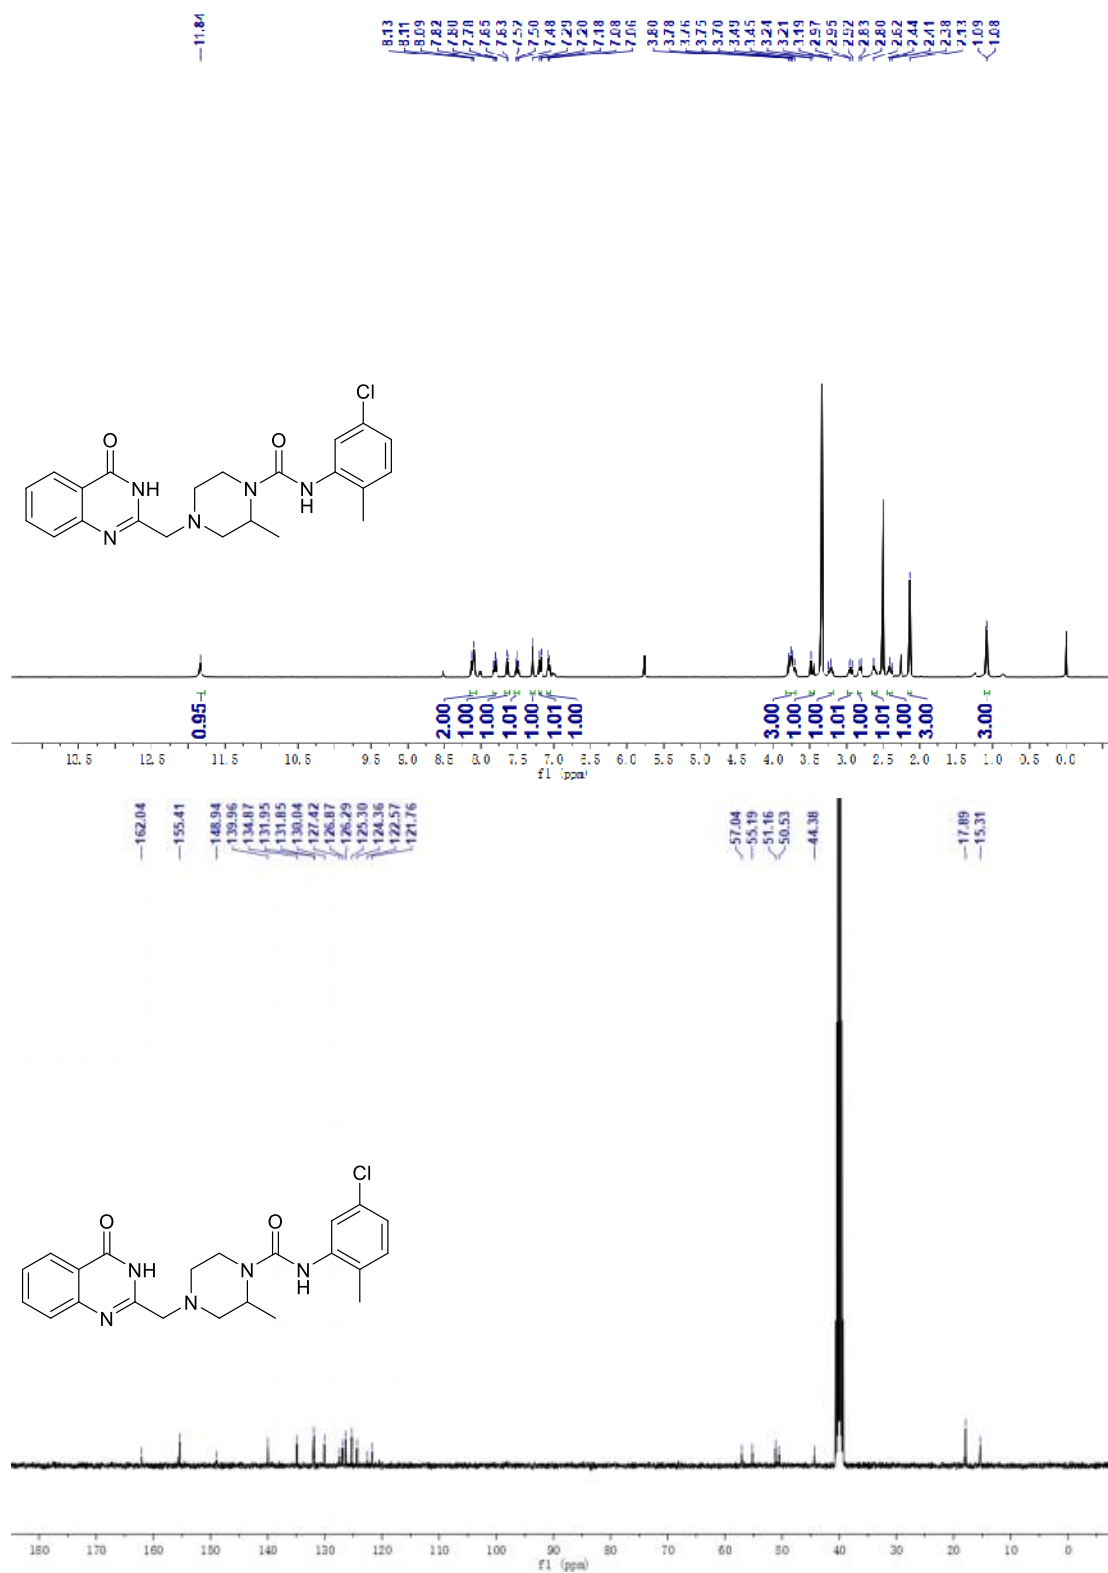

### 2.3 $^1\text{H}$ -NMR and $^{13}\text{C}$ -NMR (DMSO- $d_6$ ) spectrum of B3

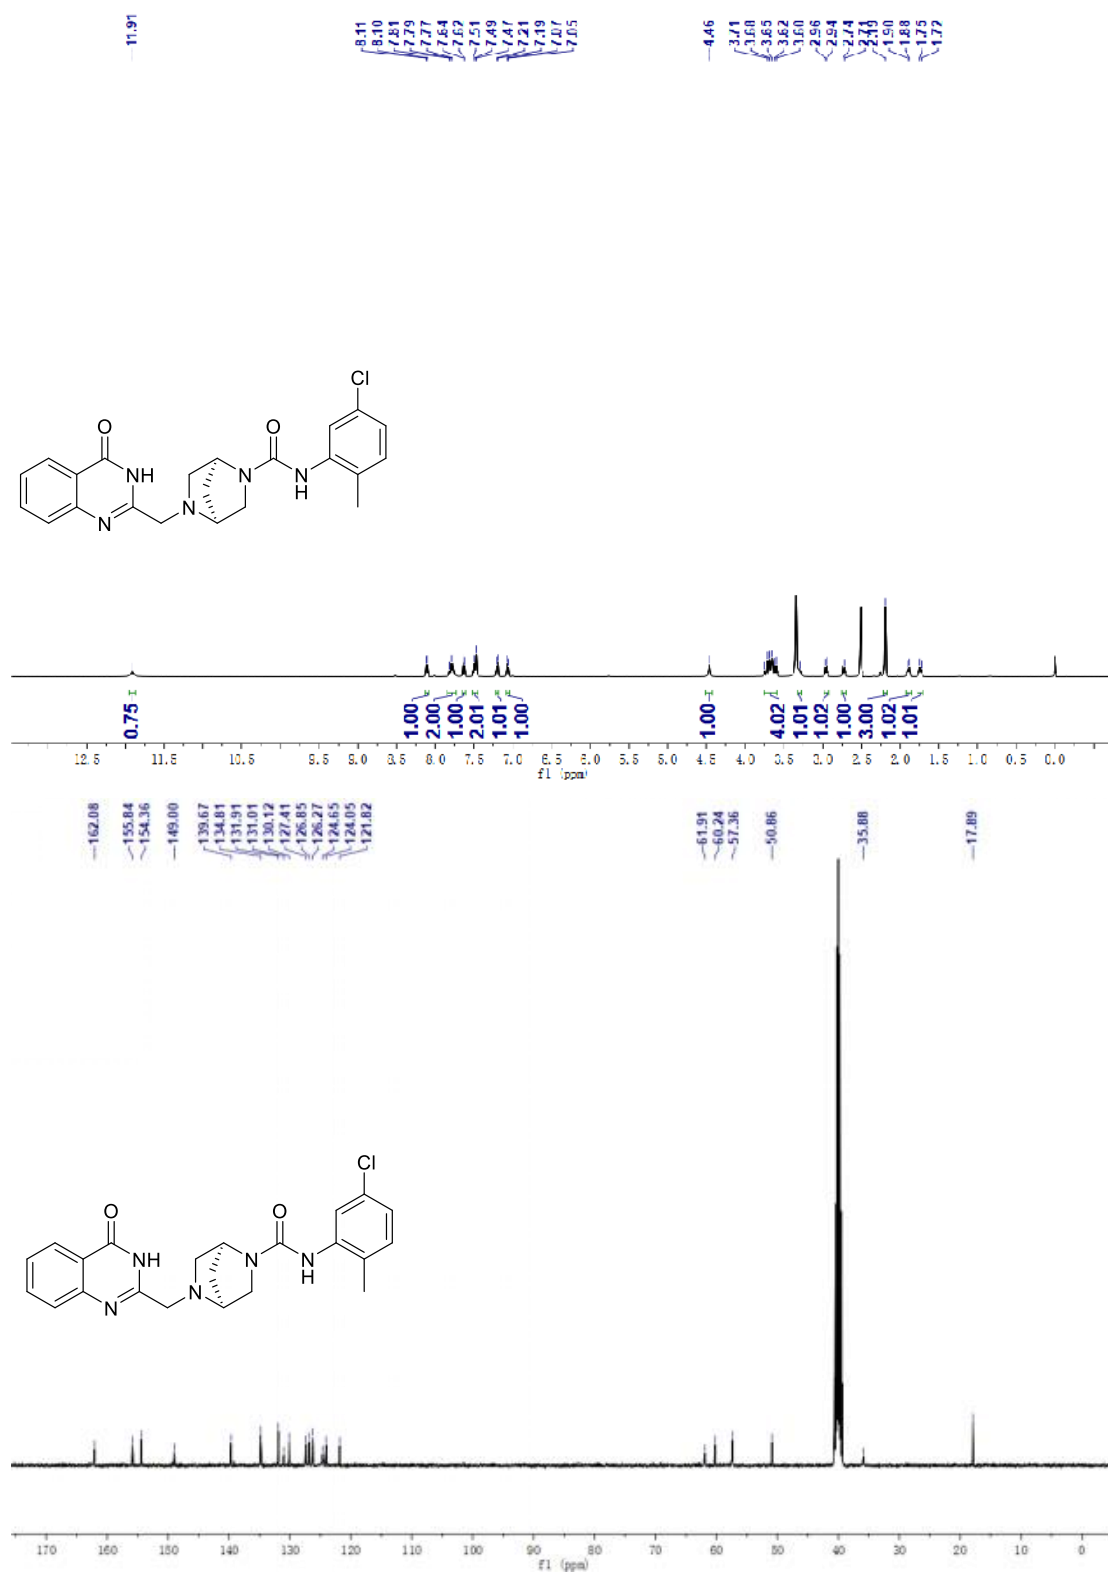

## 2.4 $^1\text{H}$ -NMR and $^{13}\text{C}$ -NMR (DMSO- $d_6$ ) spectrum of B4

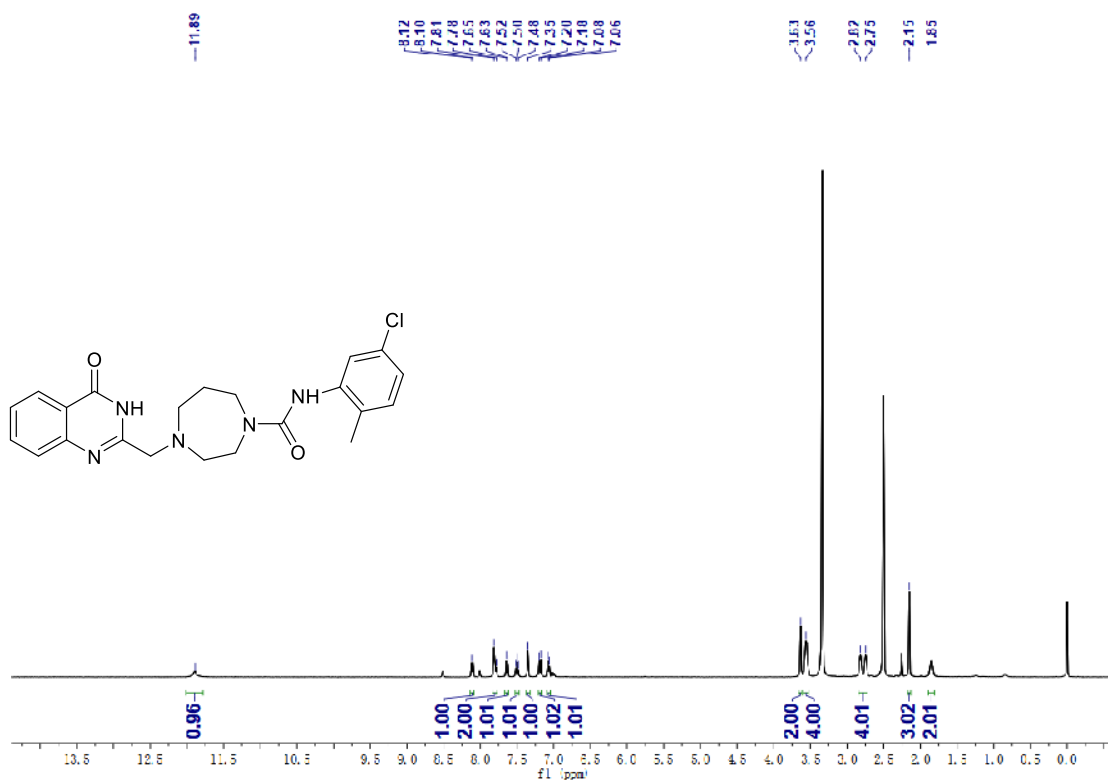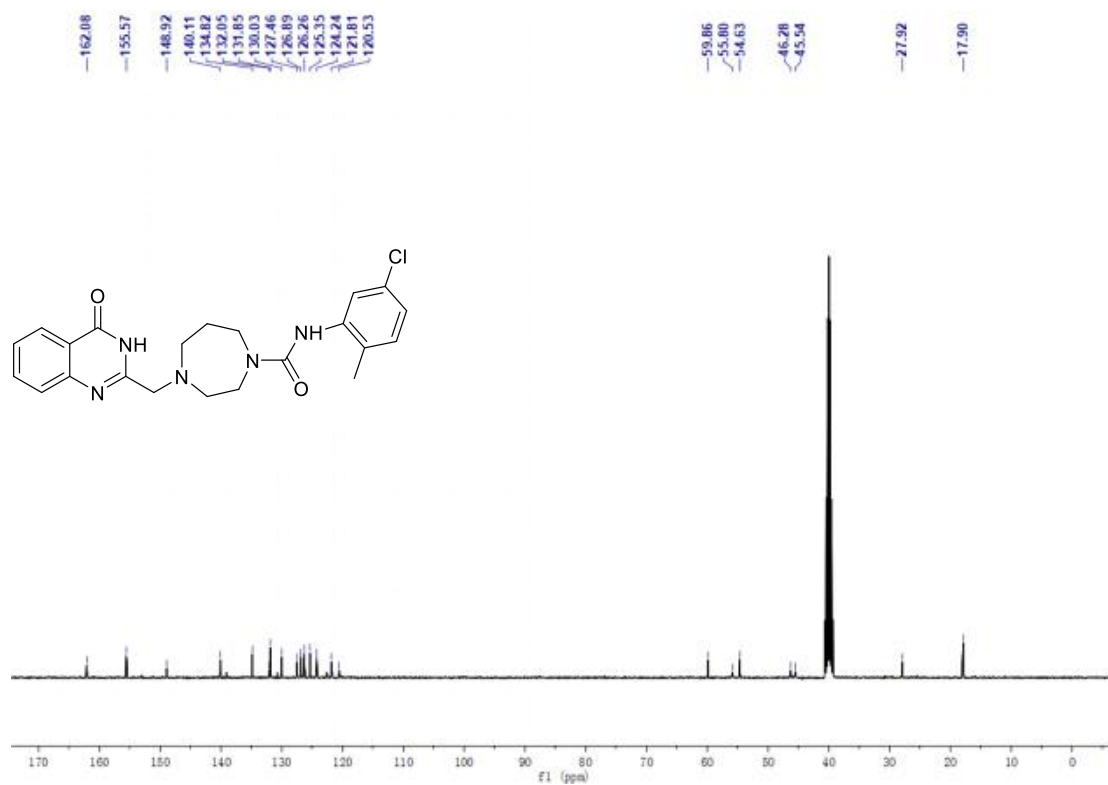

## 2.5 $^1\text{H}$ -NMR and $^{13}\text{C}$ -NMR (DMSO- $d_6$ ) spectrum of B5

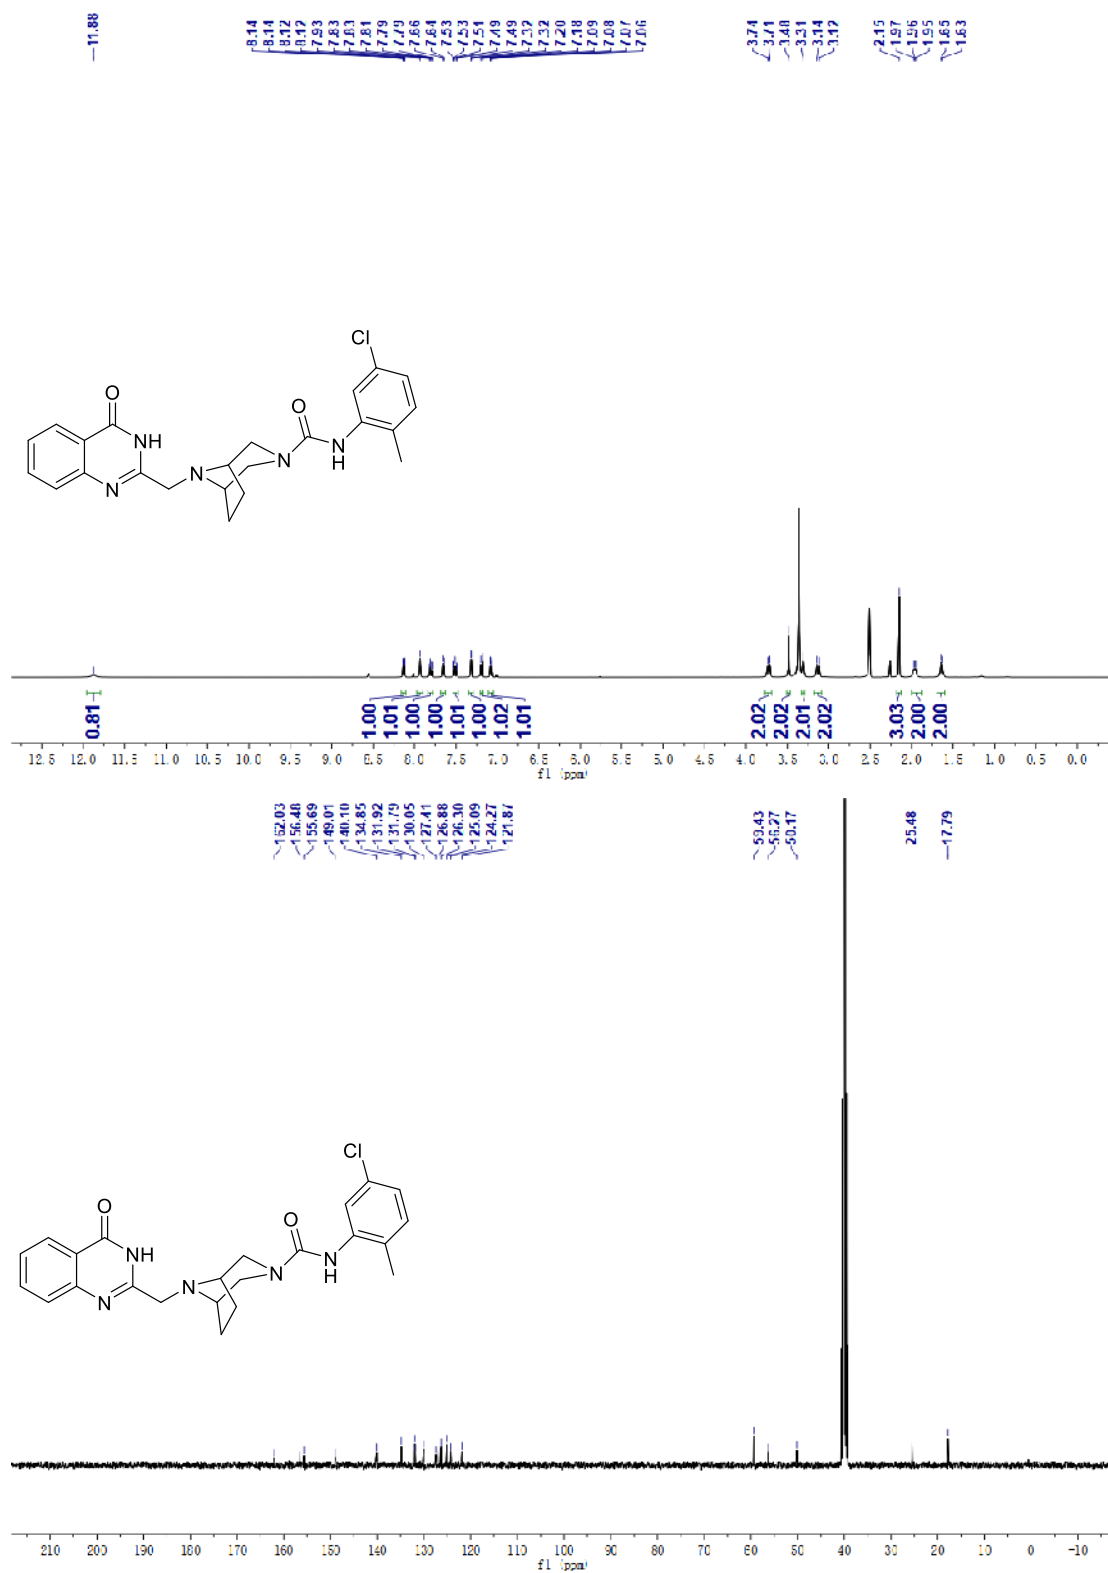

## 2.6 $^1\text{H}$ -NMR and $^{13}\text{C}$ -NMR ( $\text{CDCl}_3$ ) spectrum of B6

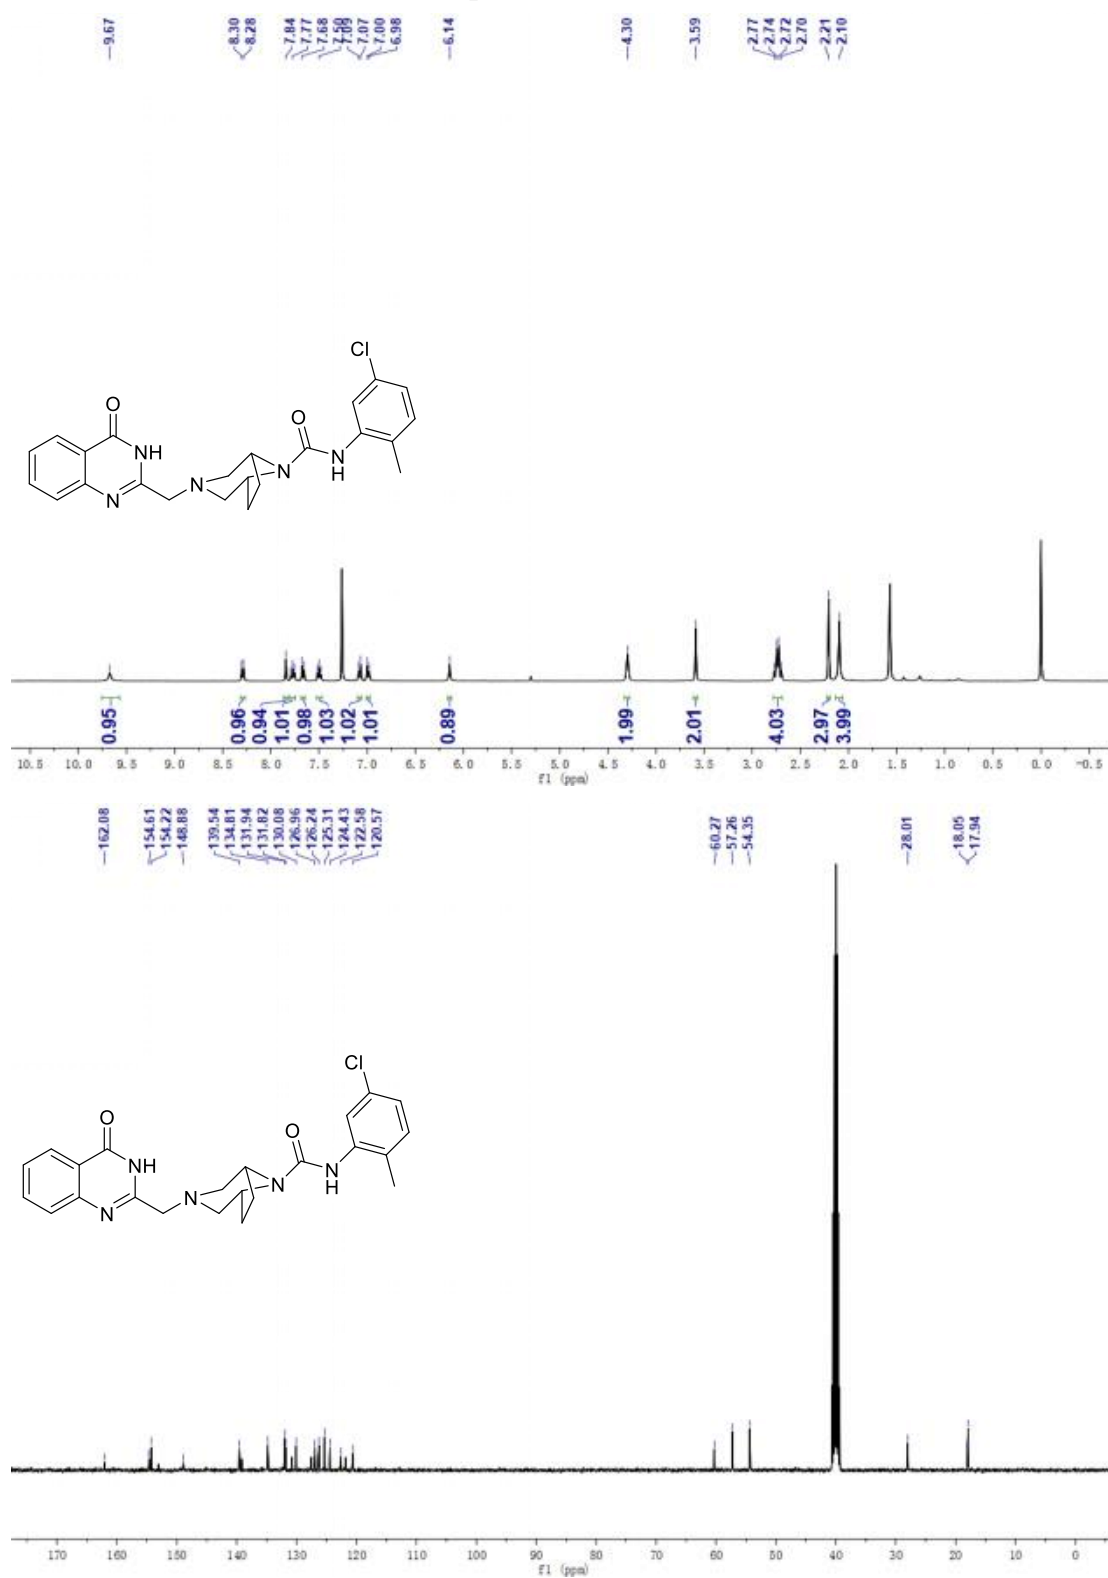

## 2.7 $^1\text{H}$ -NMR and $^{13}\text{C}$ -NMR (DMSO- $d_6$ ) spectrum of B7

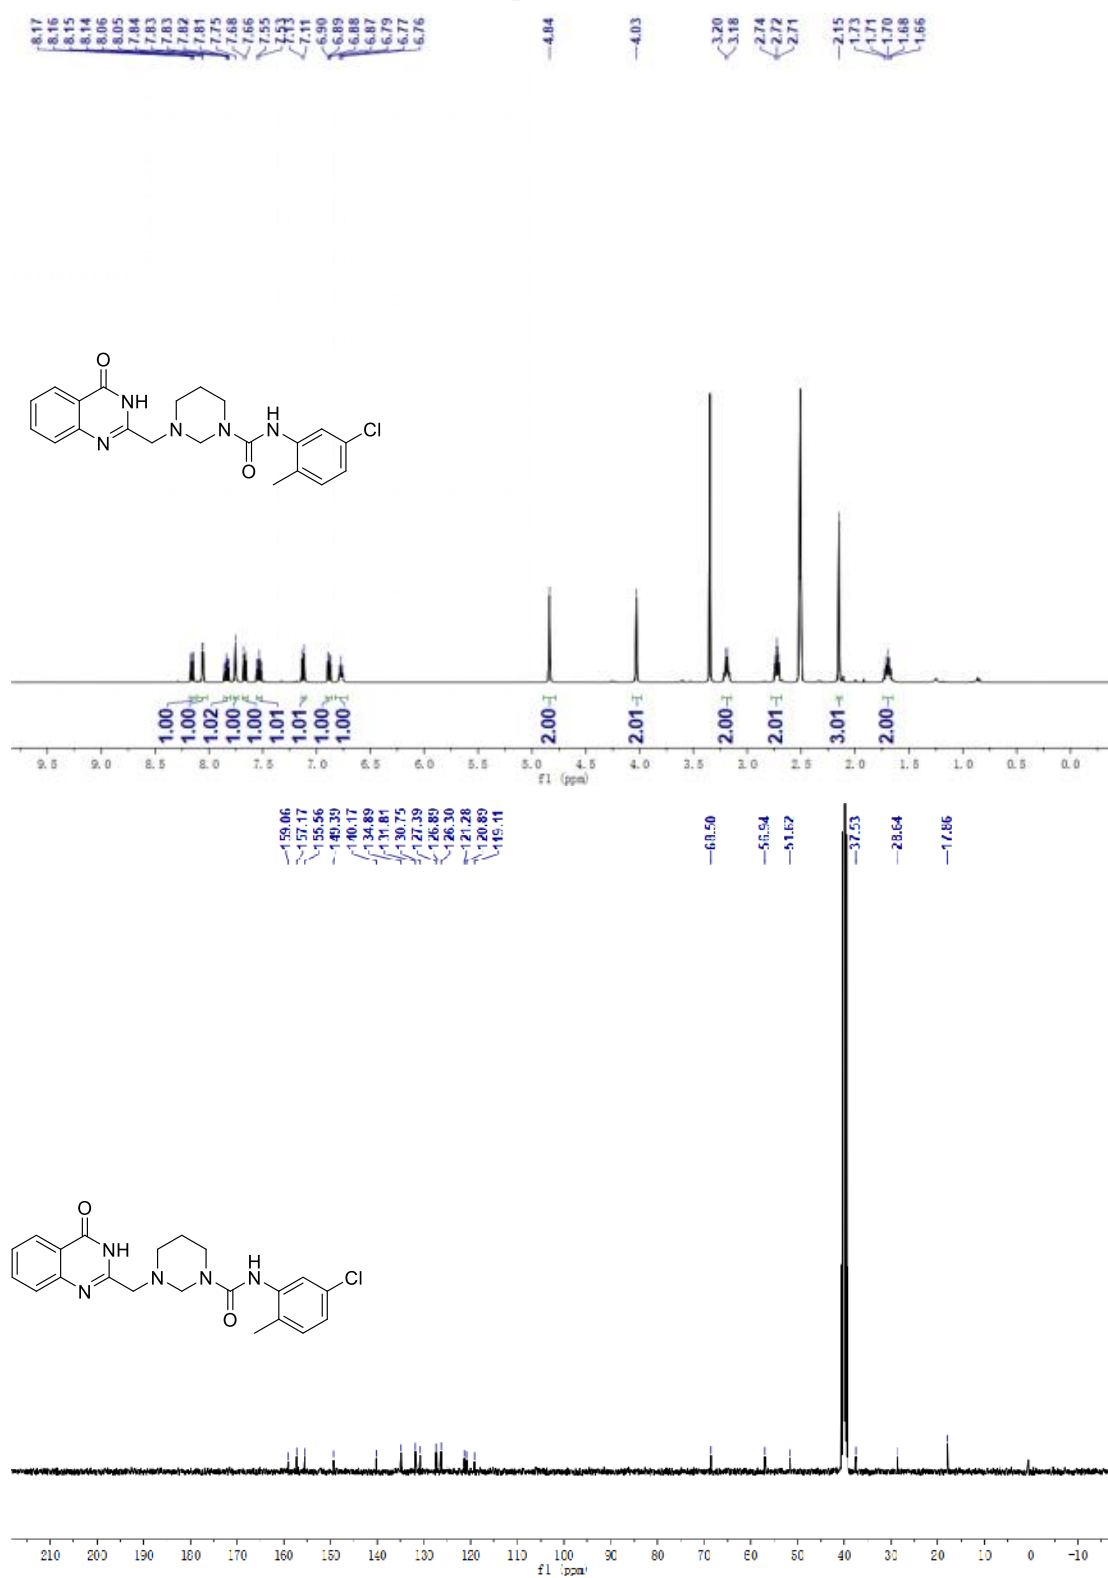

### 3.1 $^1\text{H}$ -NMR and $^{13}\text{C}$ -NMR (DMSO- $d_6$ ) spectrum of C1

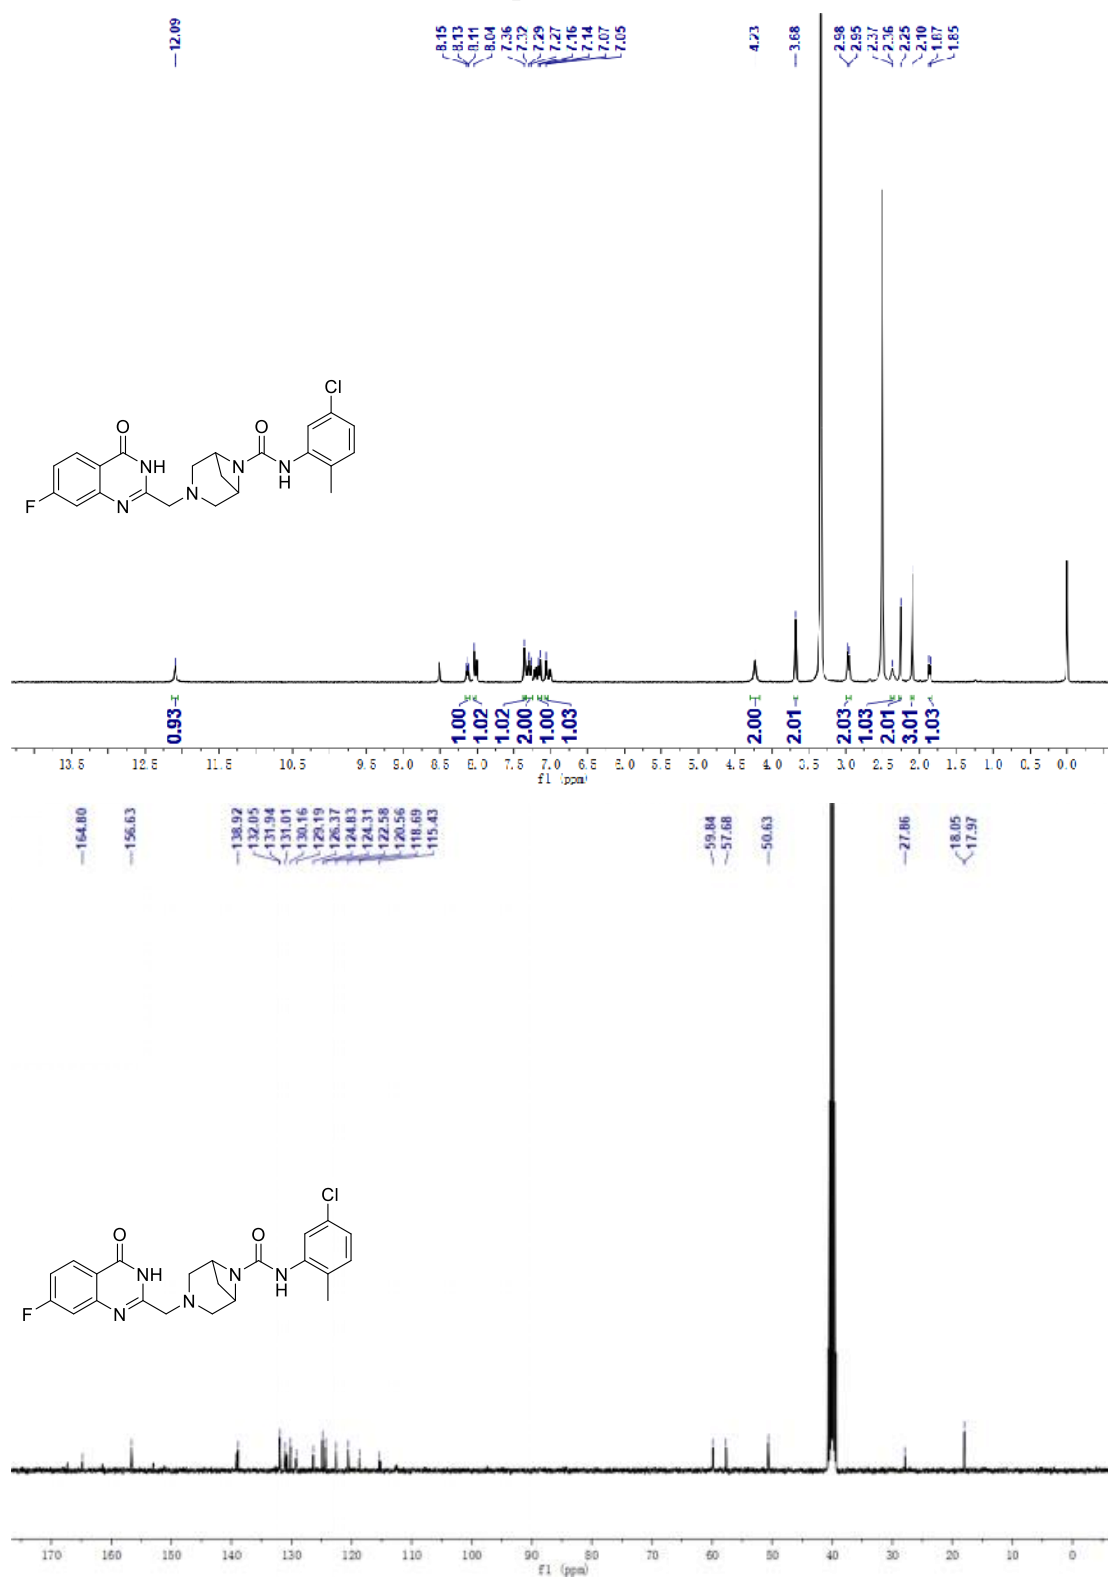

### 3.2 $^1\text{H}$ -NMR and $^{13}\text{C}$ -NMR (DMSO- $d_6$ ) spectrum of C2

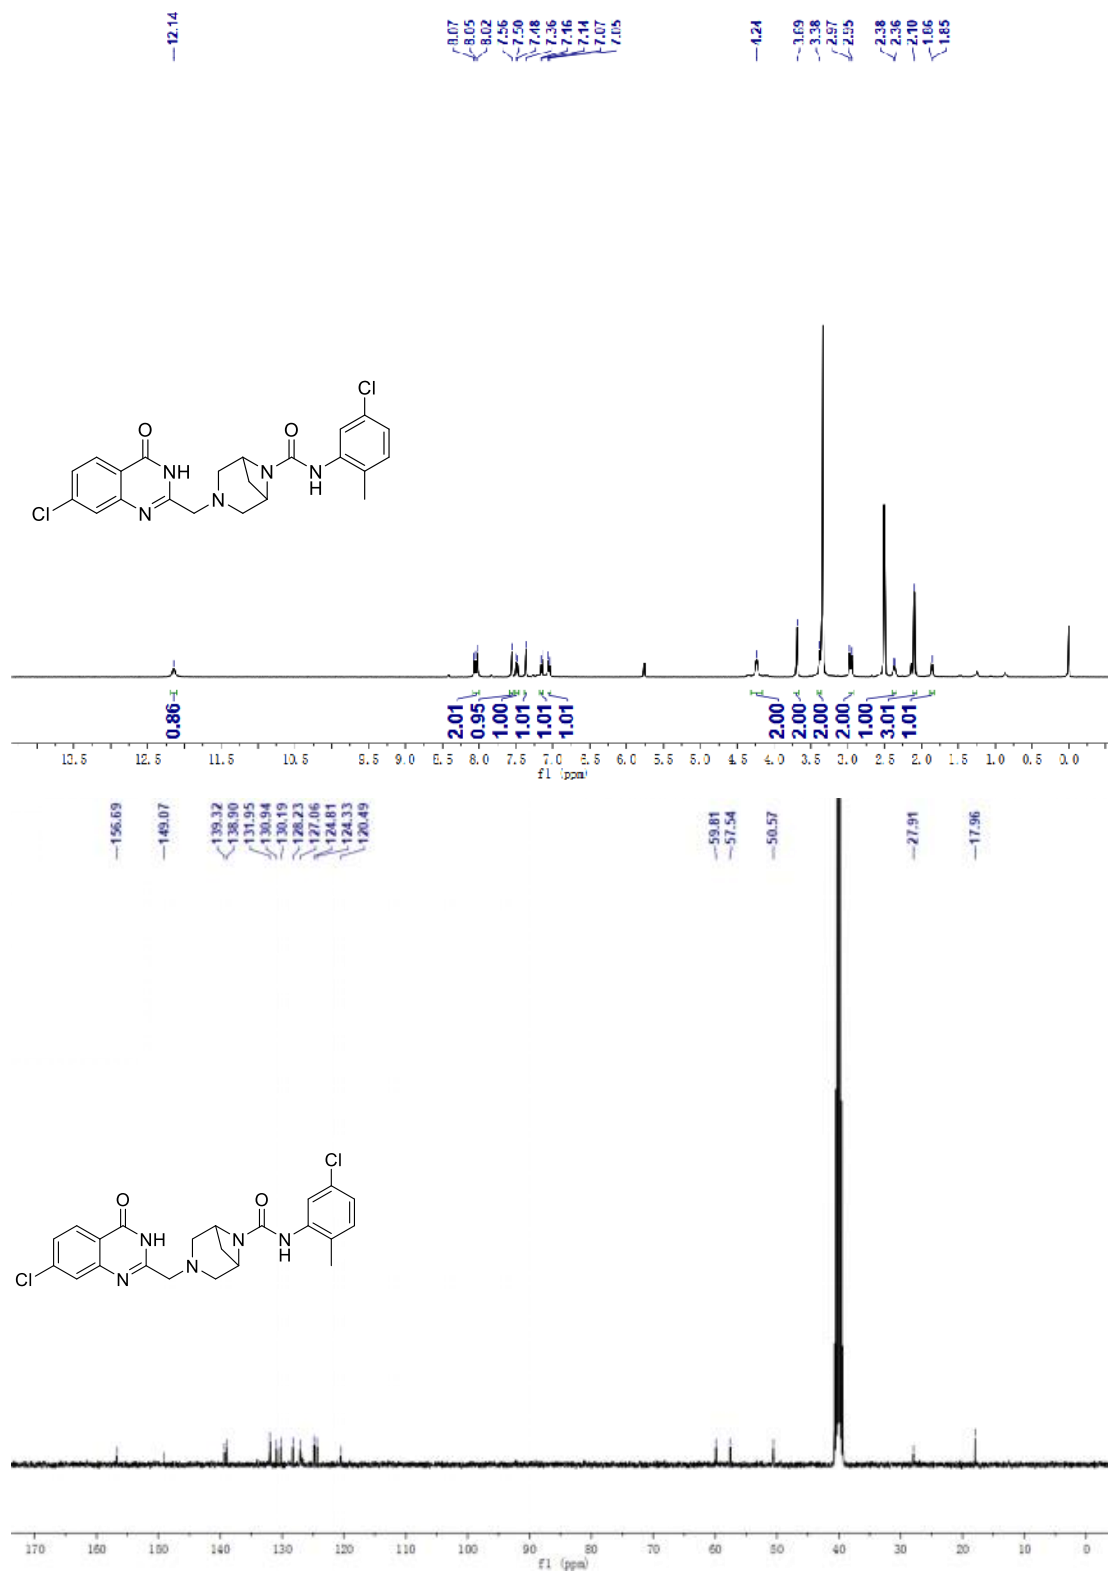

### 3.3 $^1\text{H}$ -NMR and $^{13}\text{C}$ -NMR (DMSO- $d_6$ ) spectrum of C3

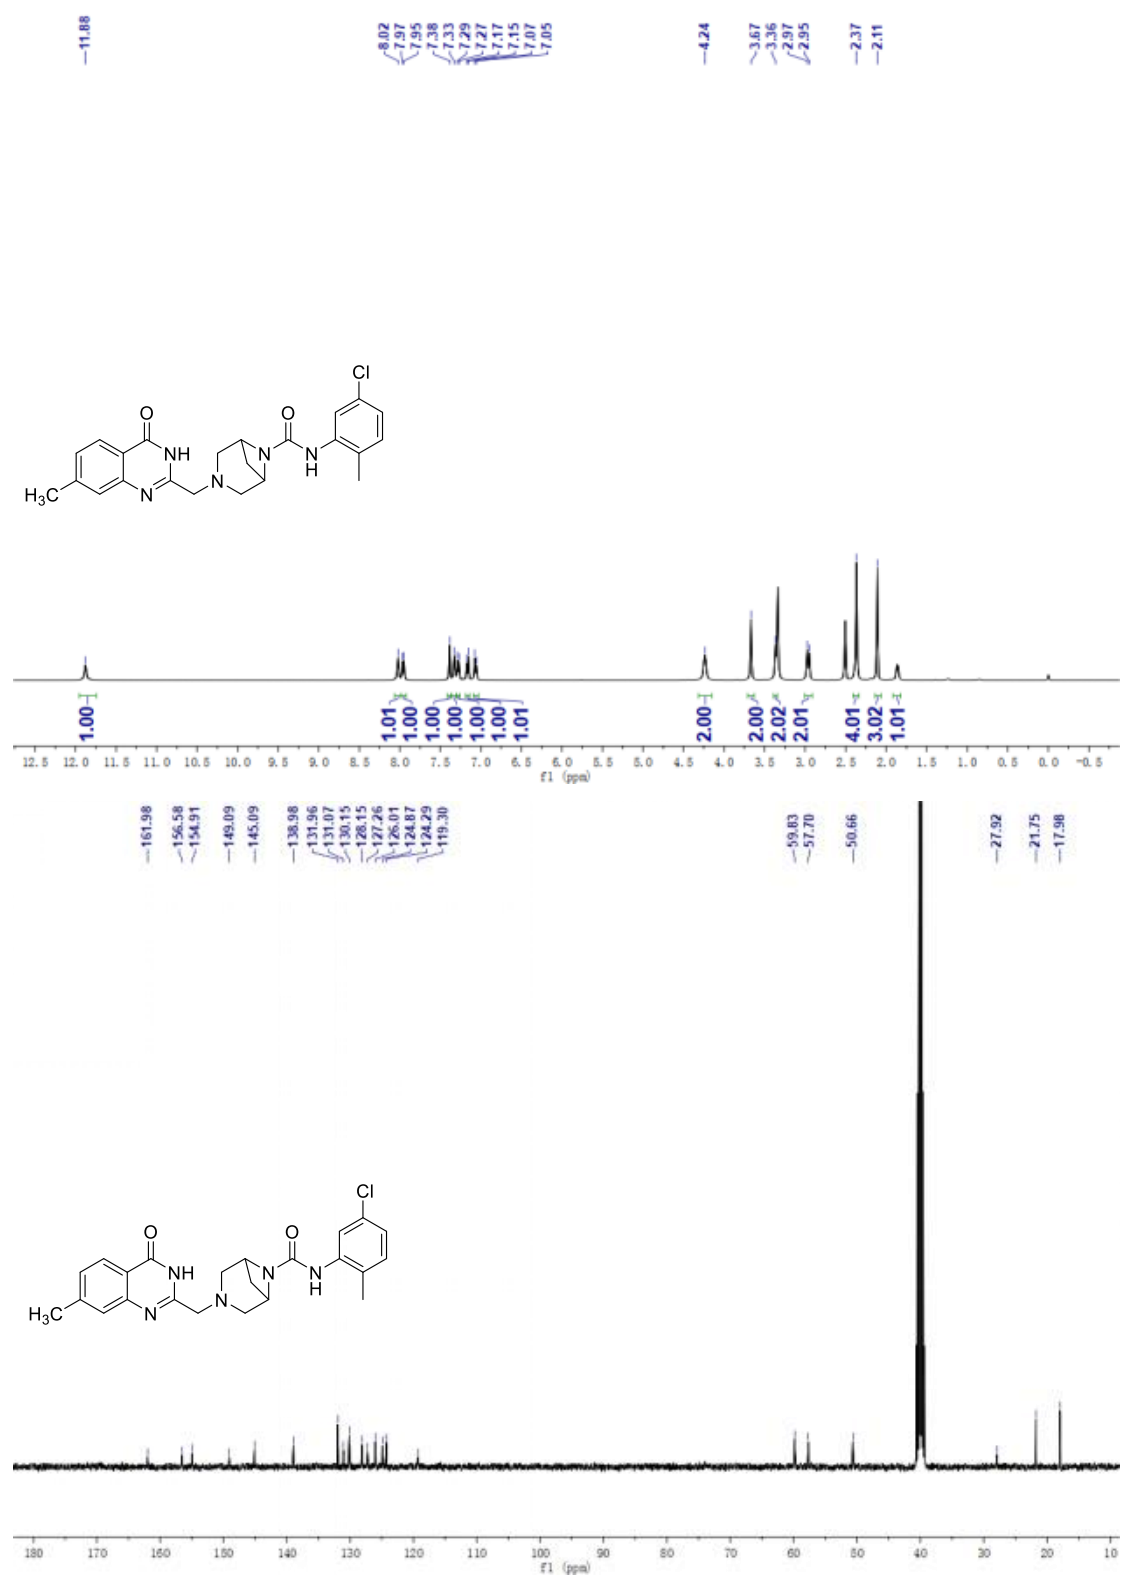

### 3.4 $^1\text{H}$ -NMR and $^{13}\text{C}$ -NMR (DMSO- $d_6$ ) spectrum of C4

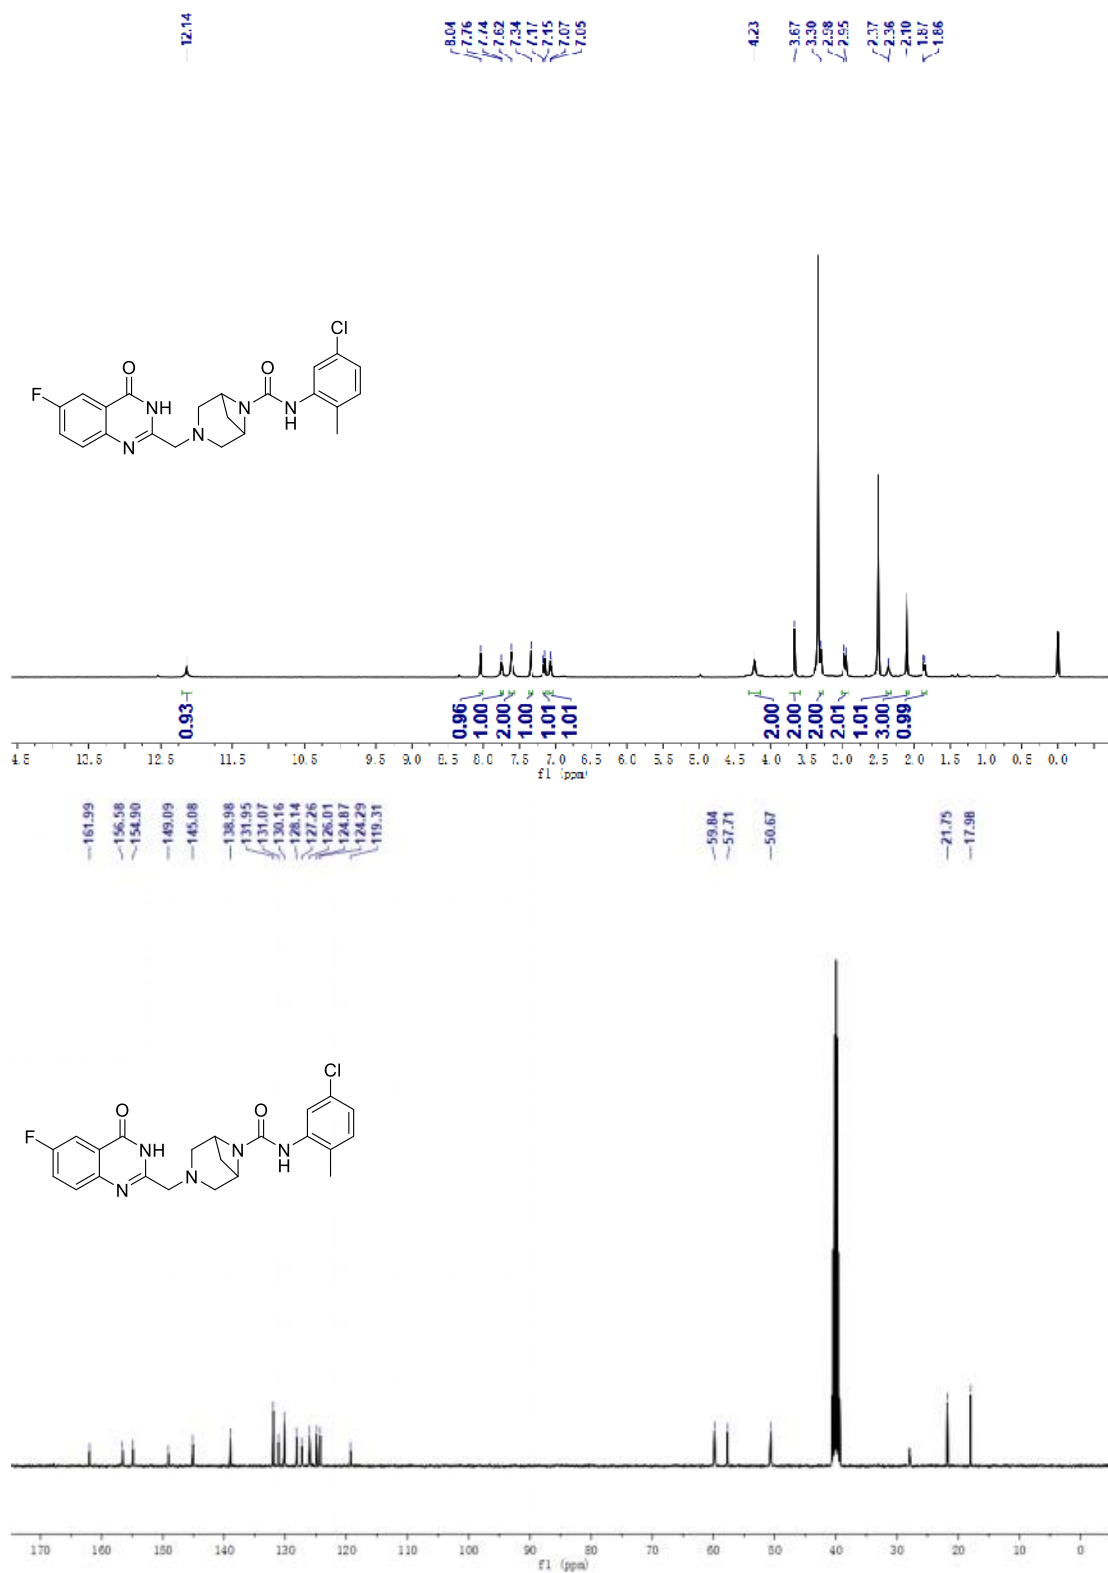

### 3.5 $^1\text{H}$ -NMR and $^{13}\text{C}$ -NMR (DMSO- $d_6$ ) spectrum of C5

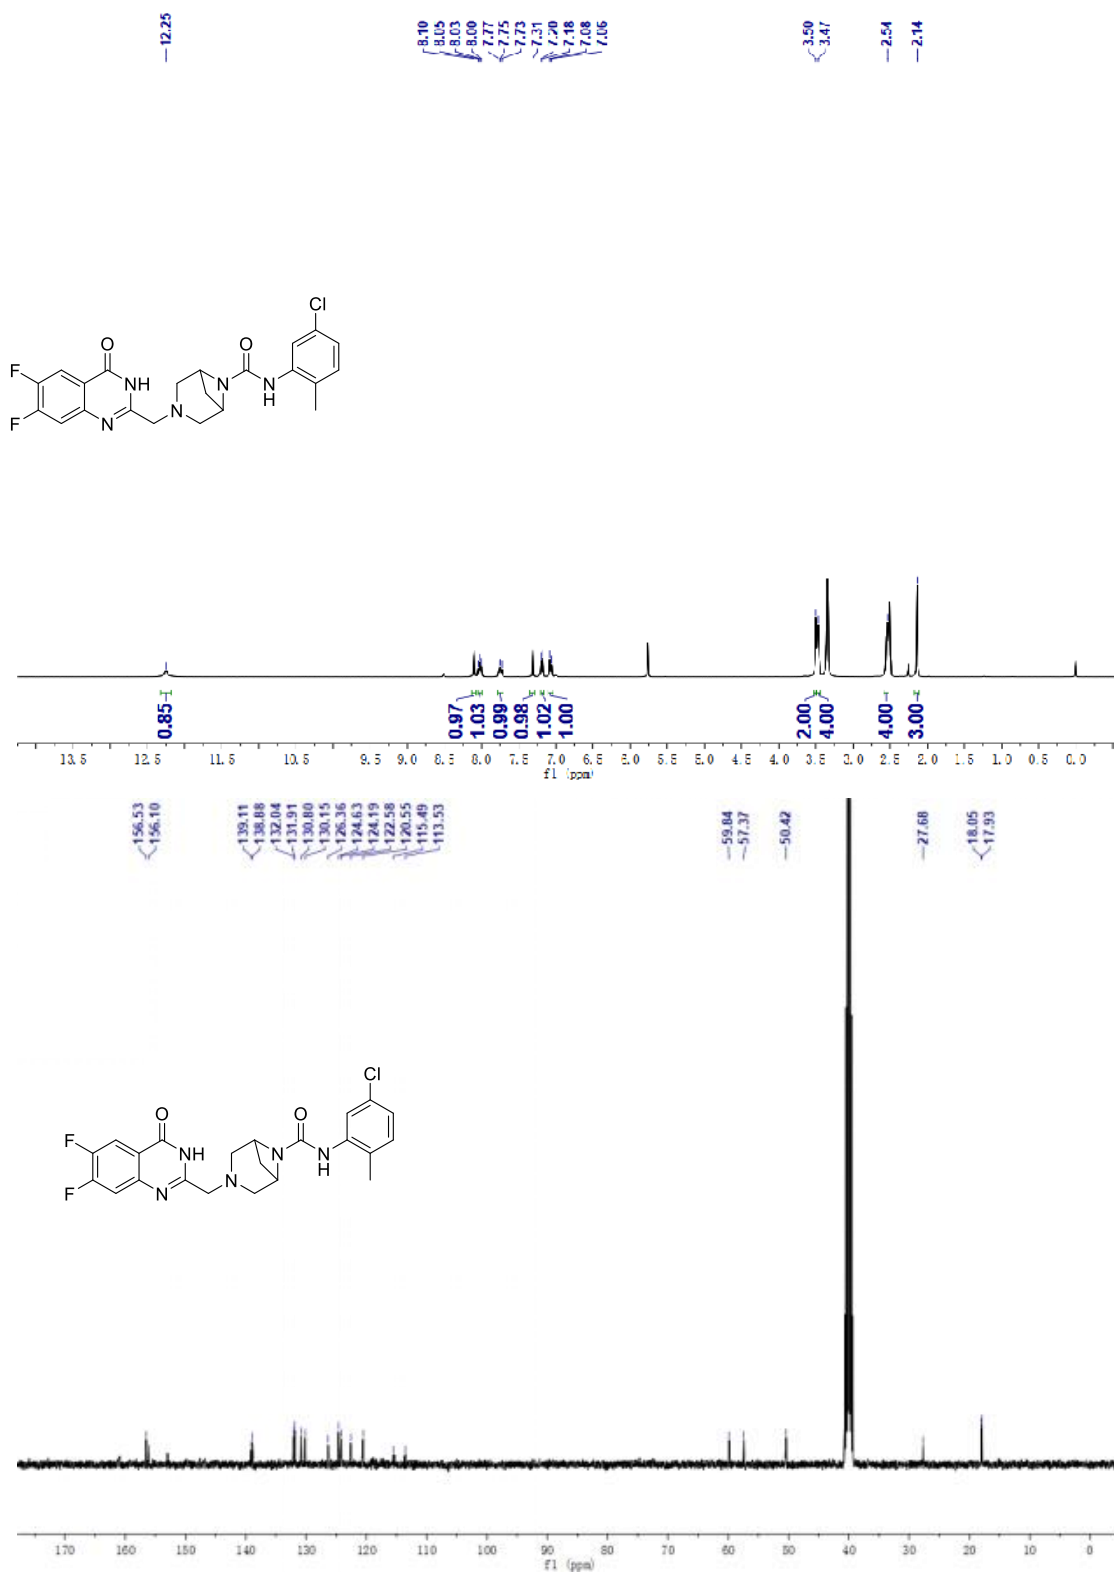

## **S5: Mass Spectral of synthetic compounds**

## S5: Mass Spectral of synthetic compounds

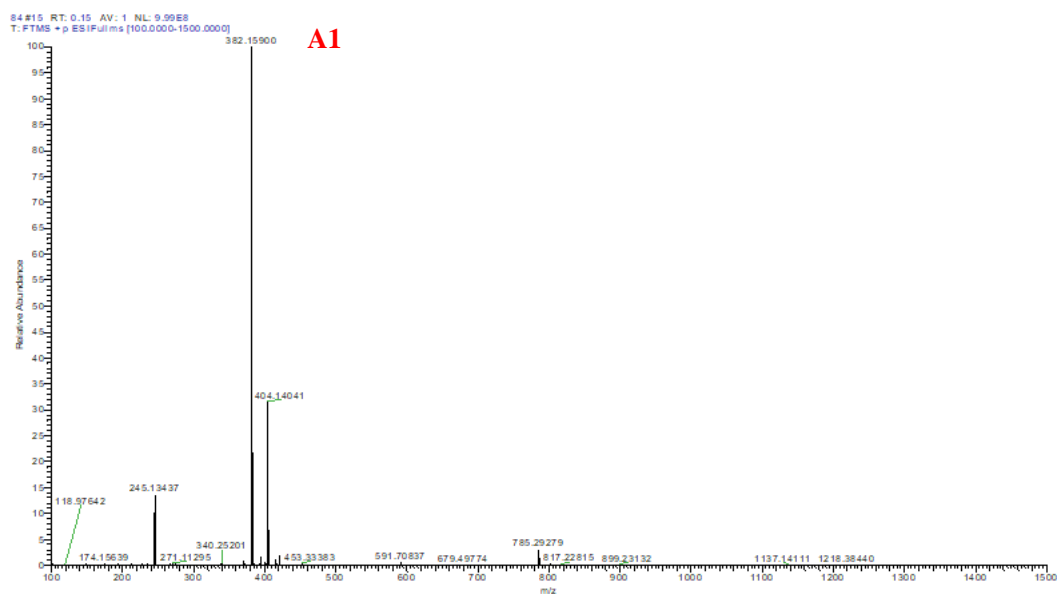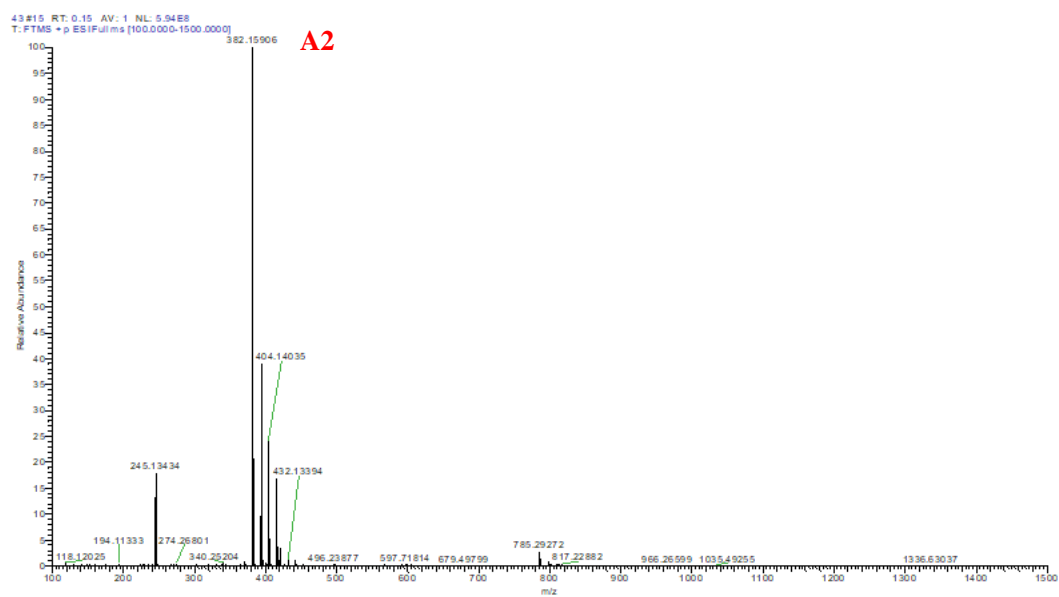

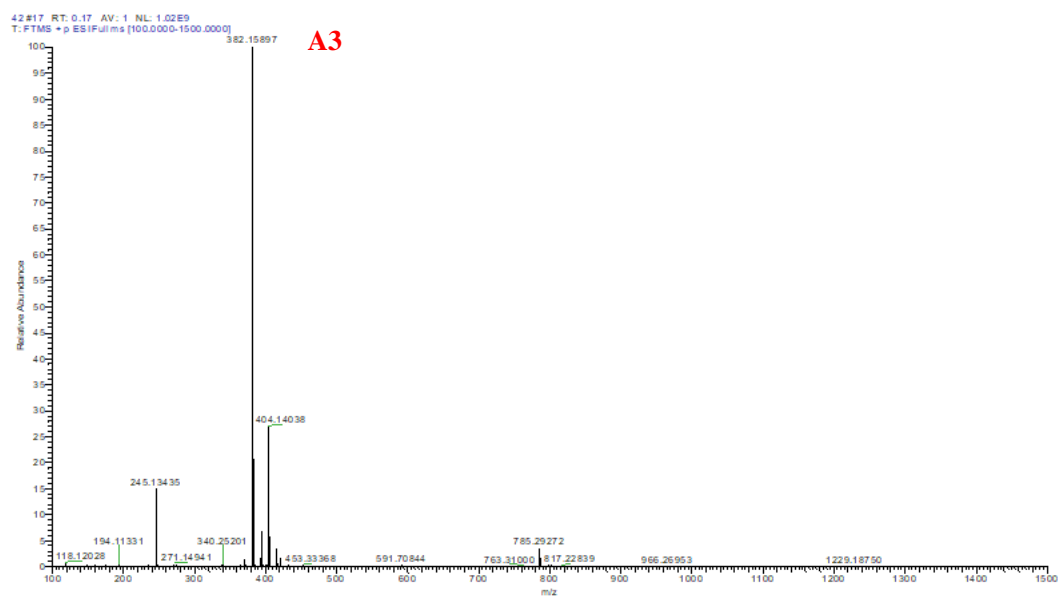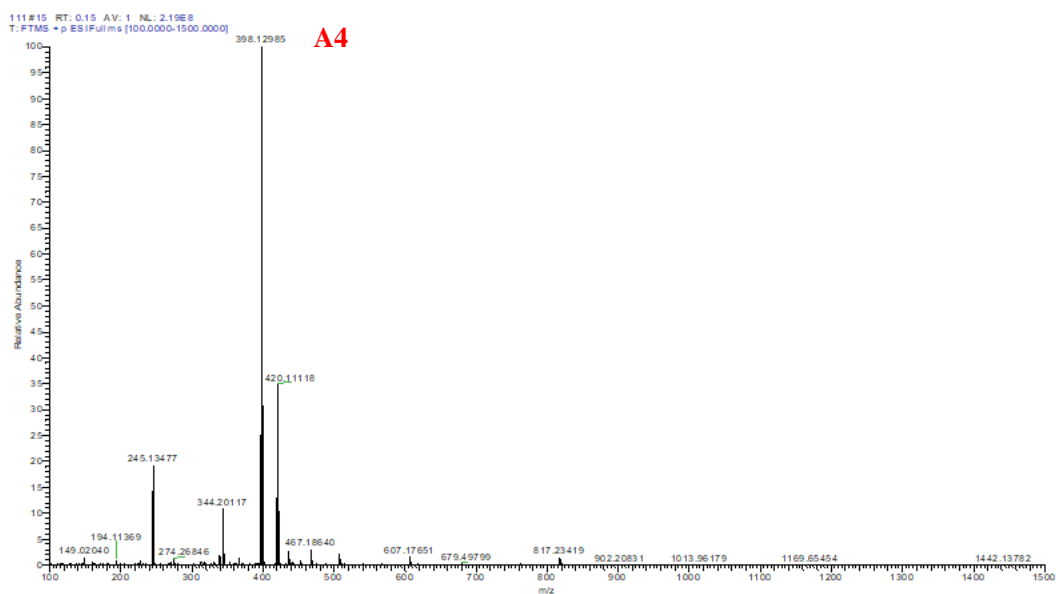

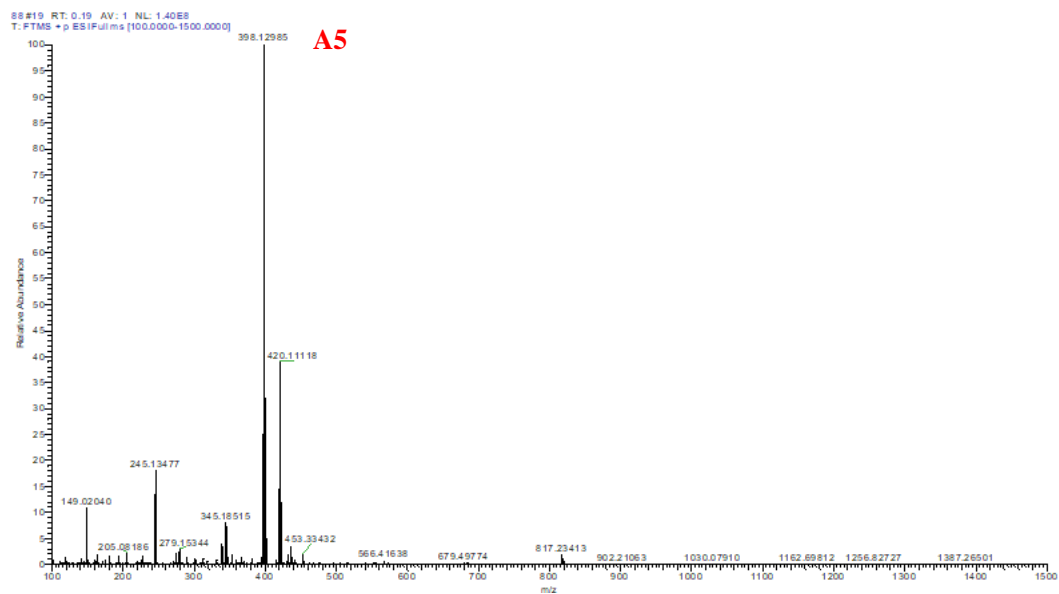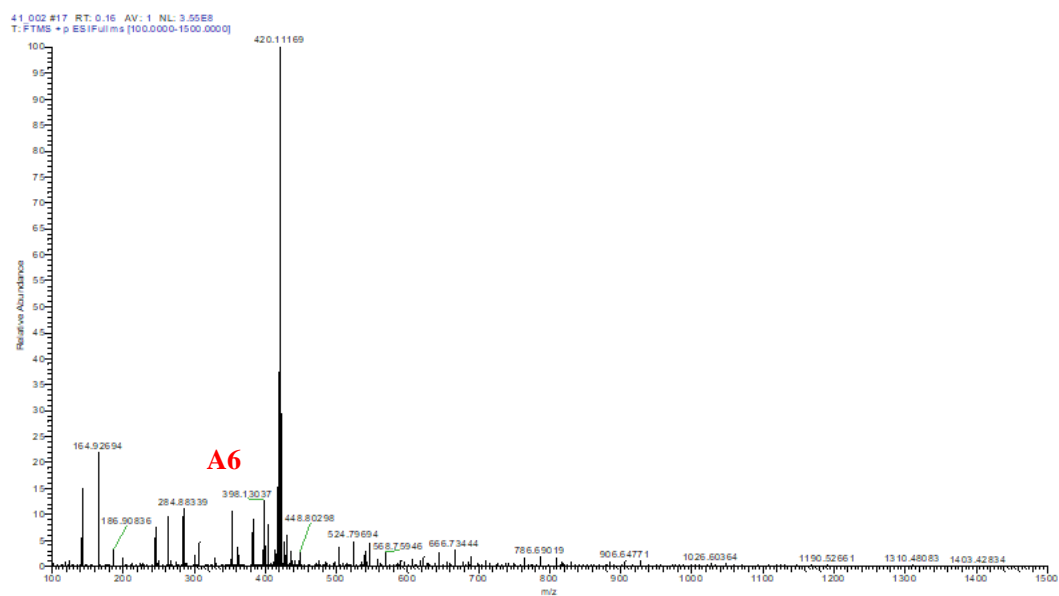

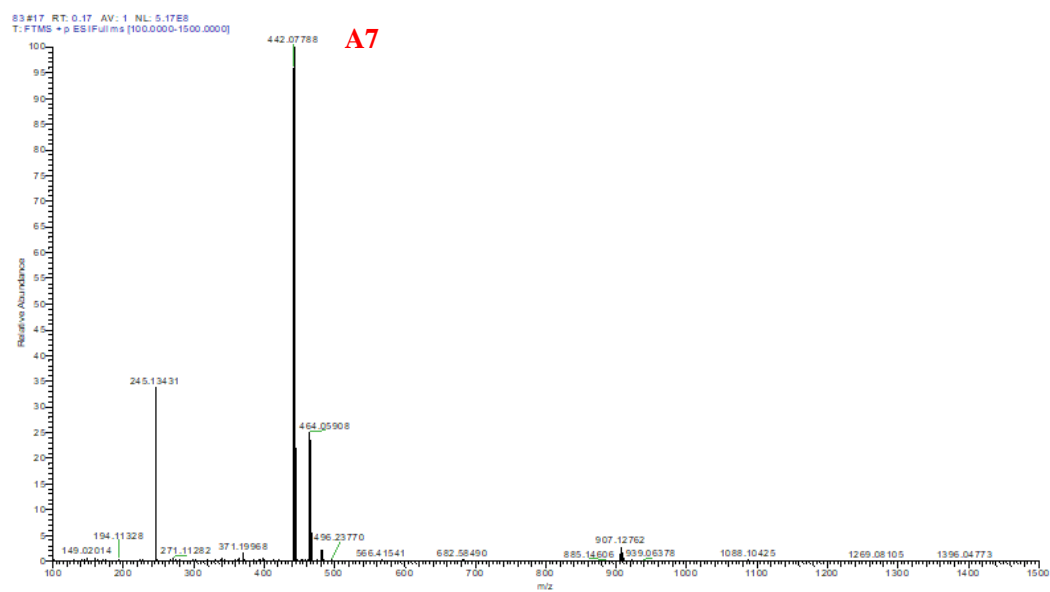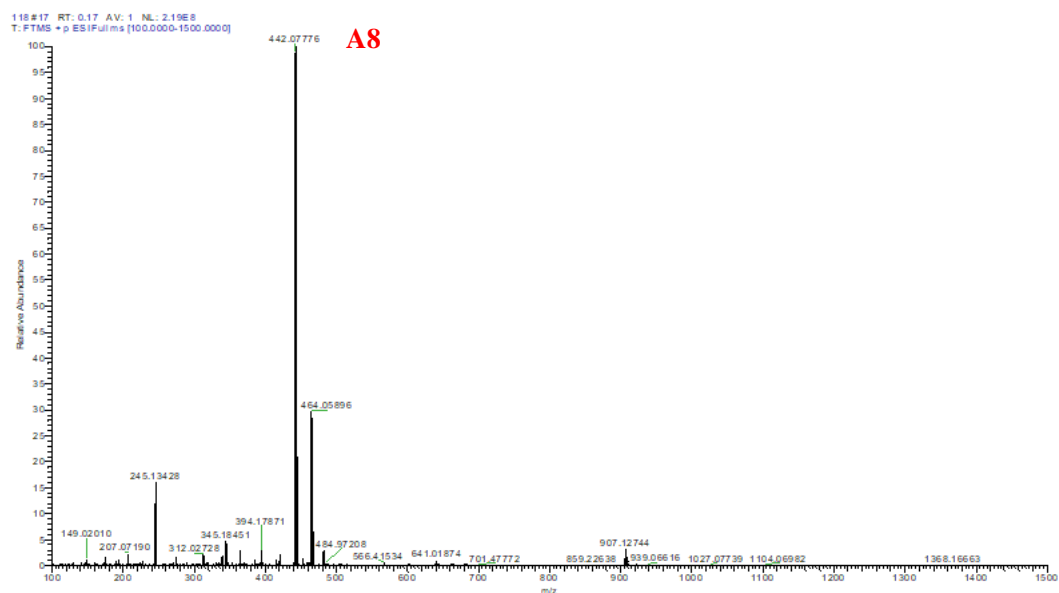

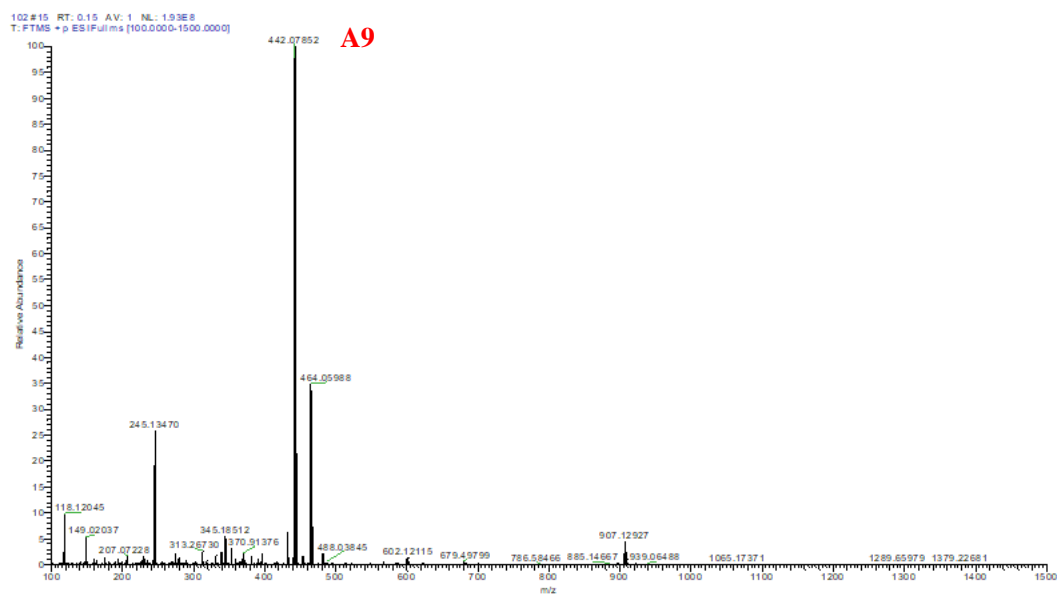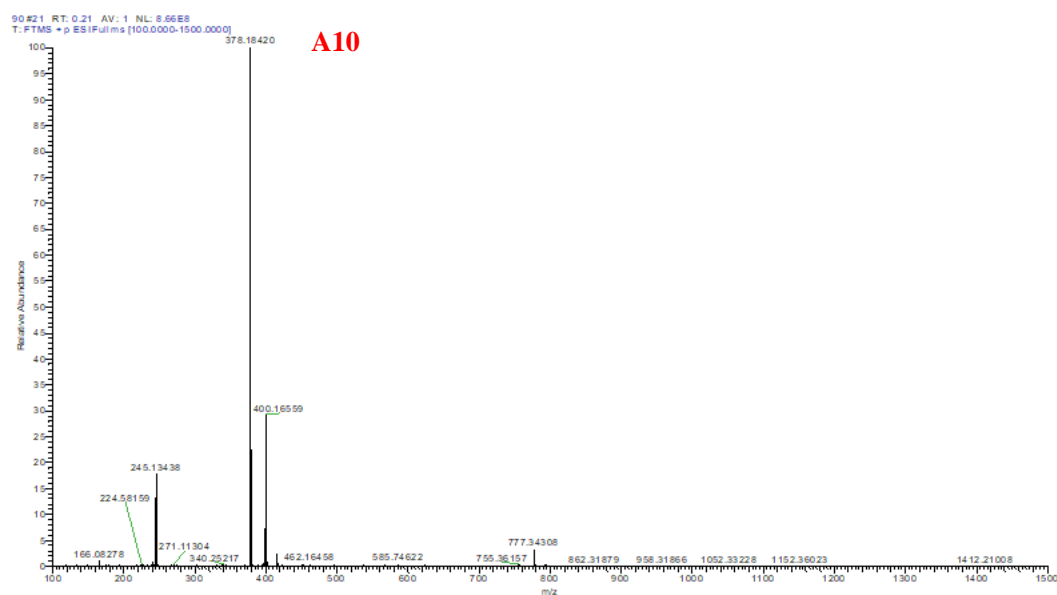

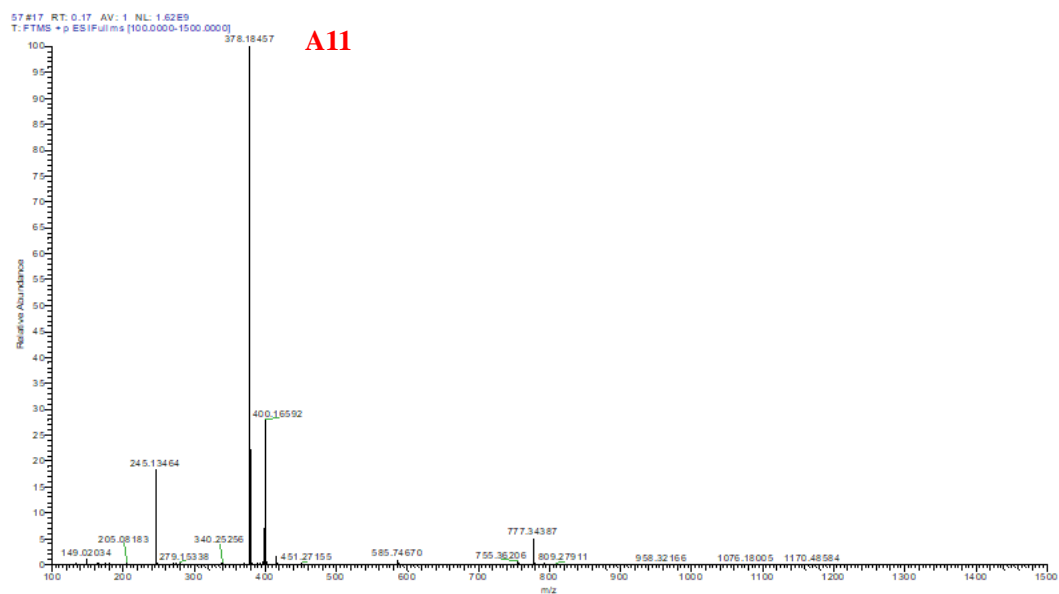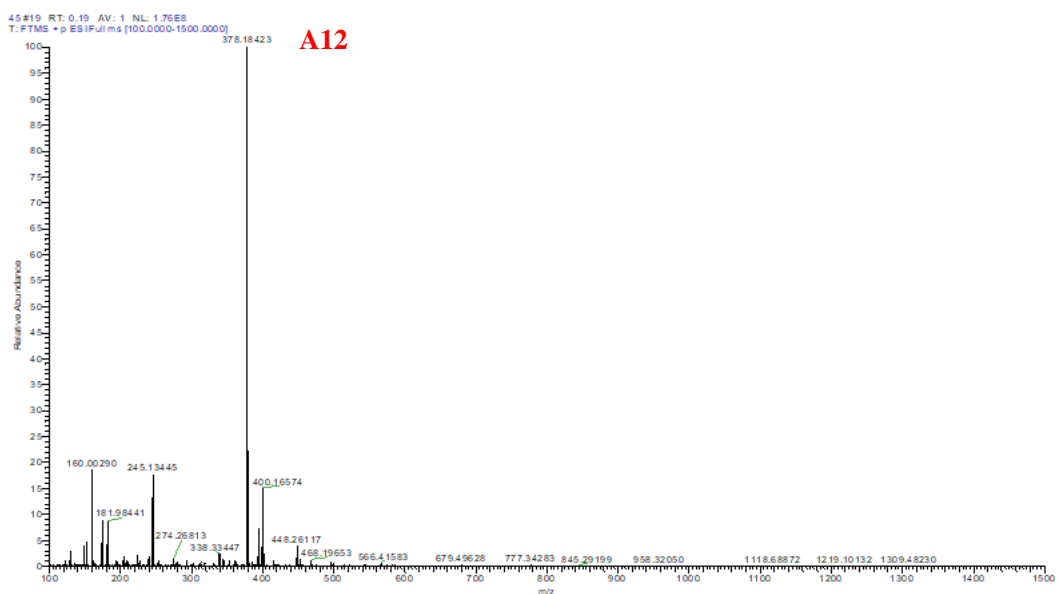

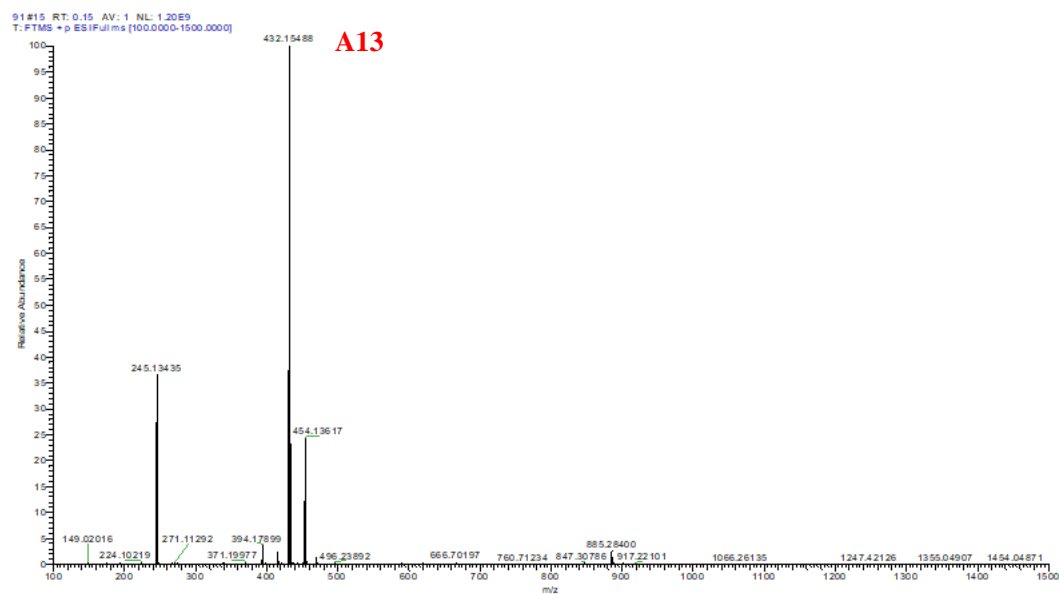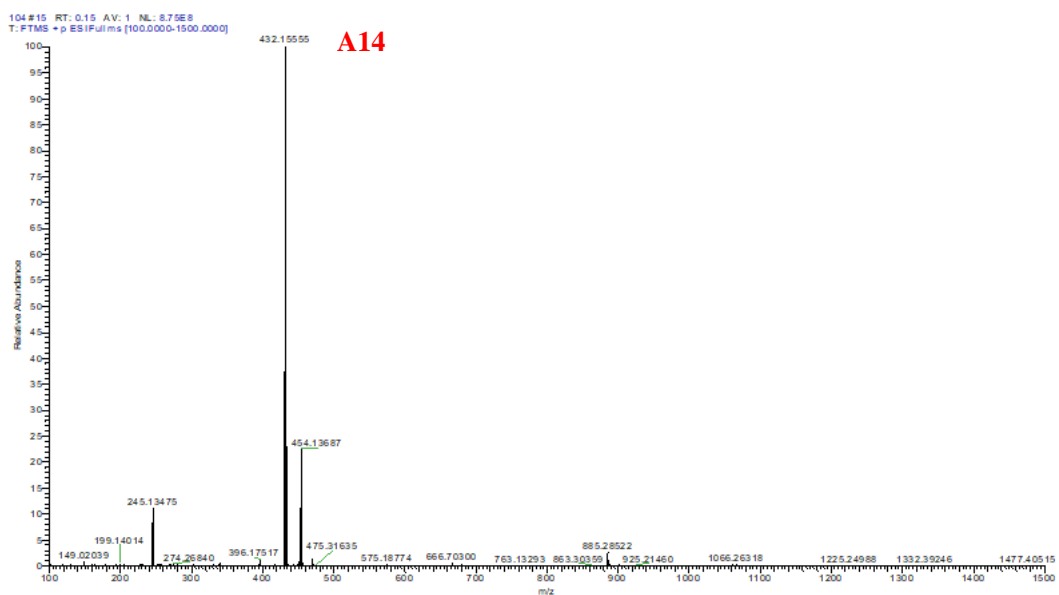

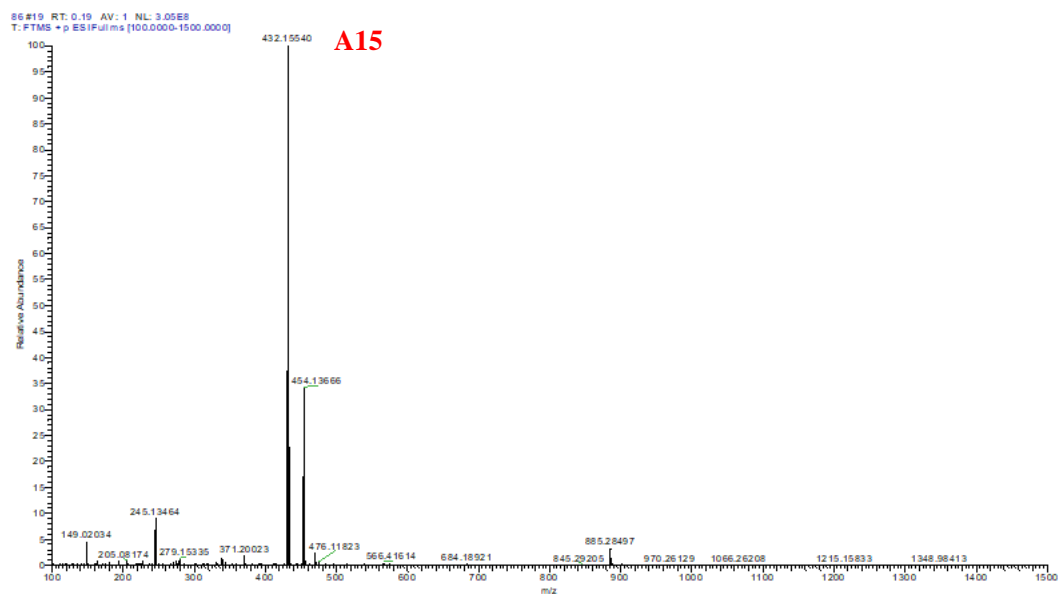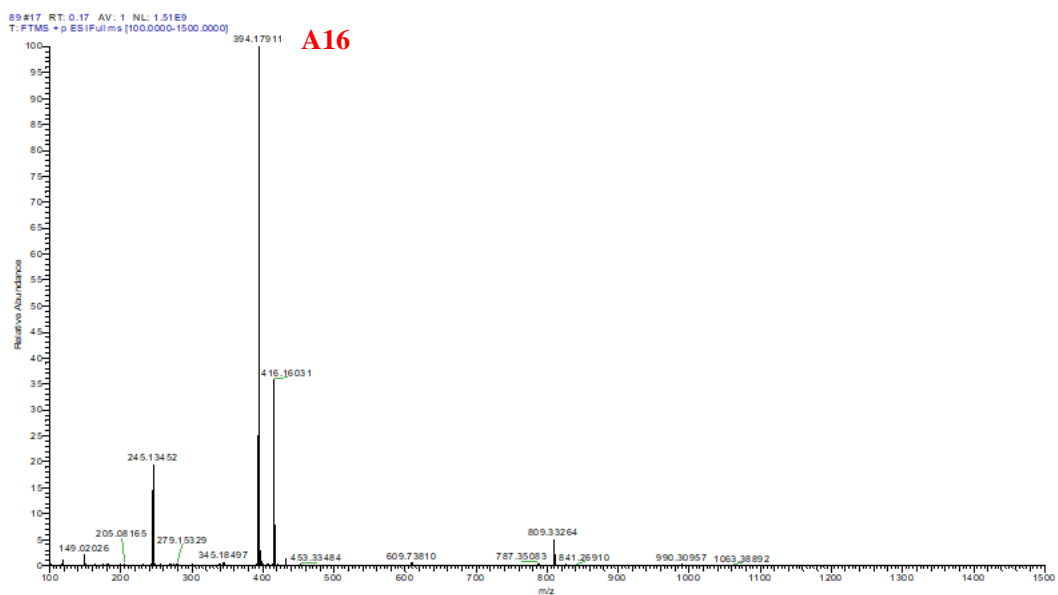

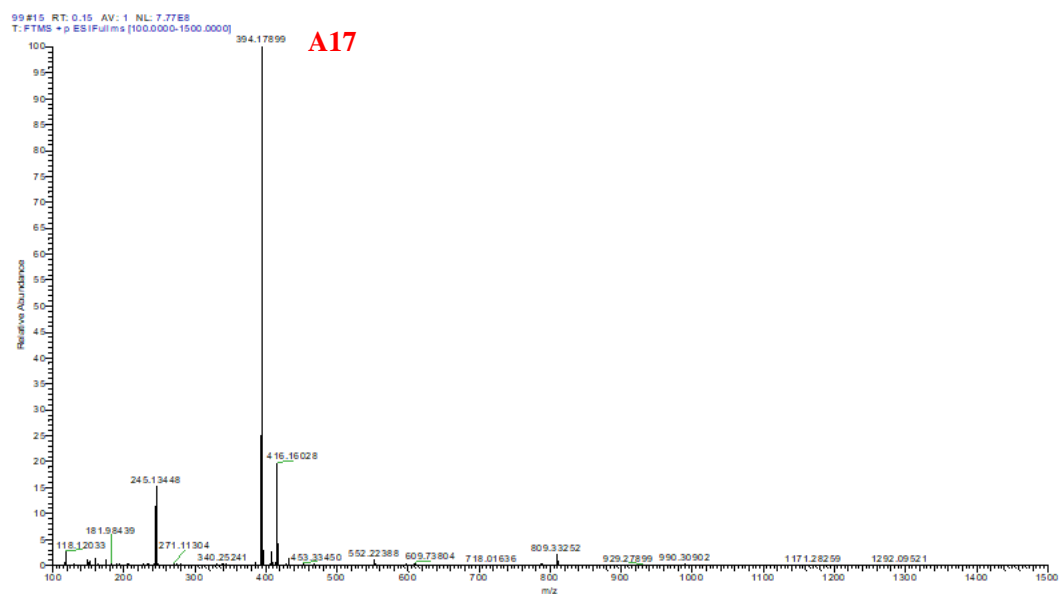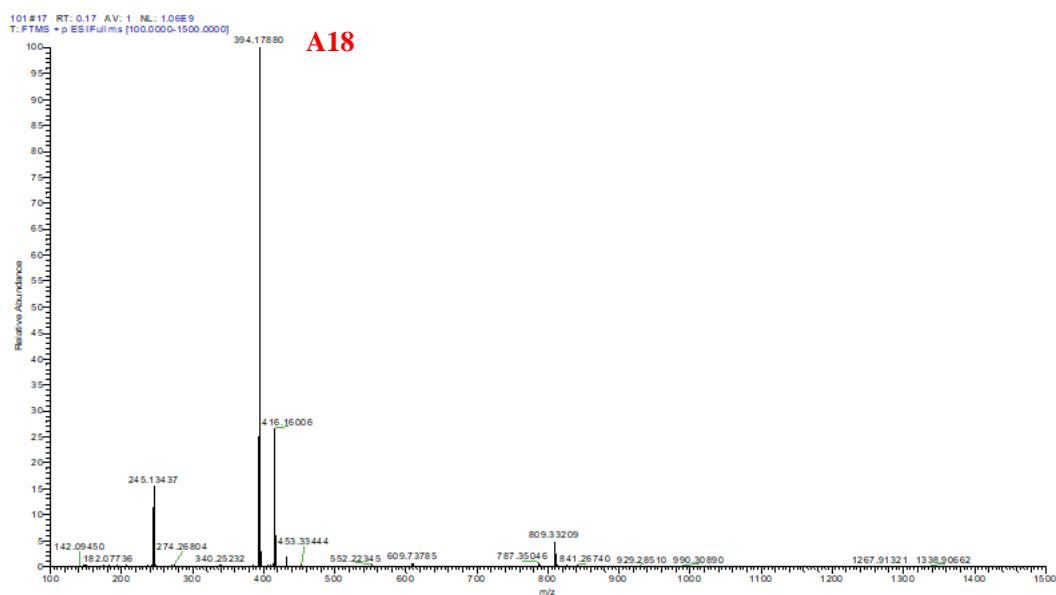

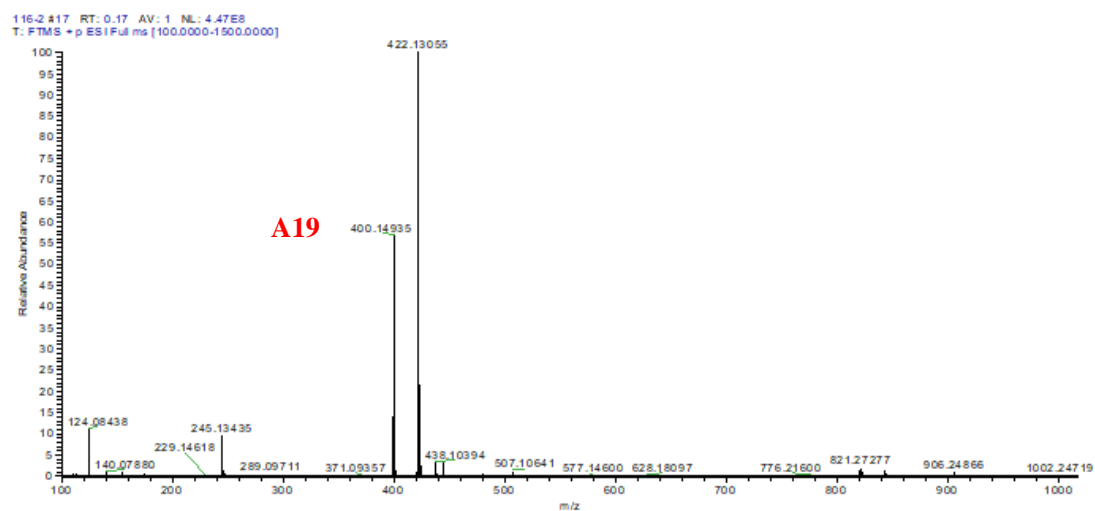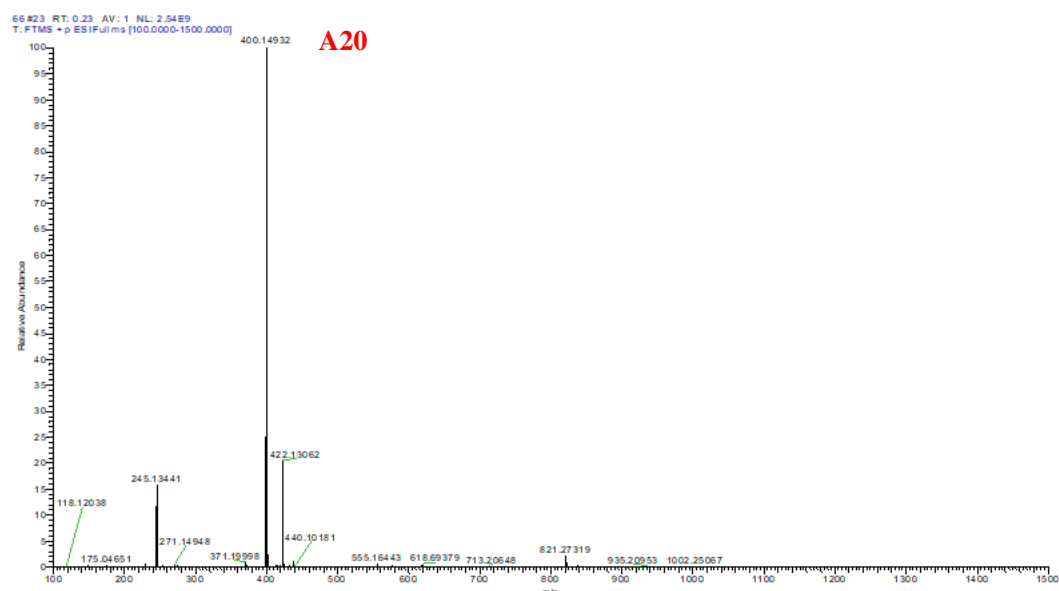

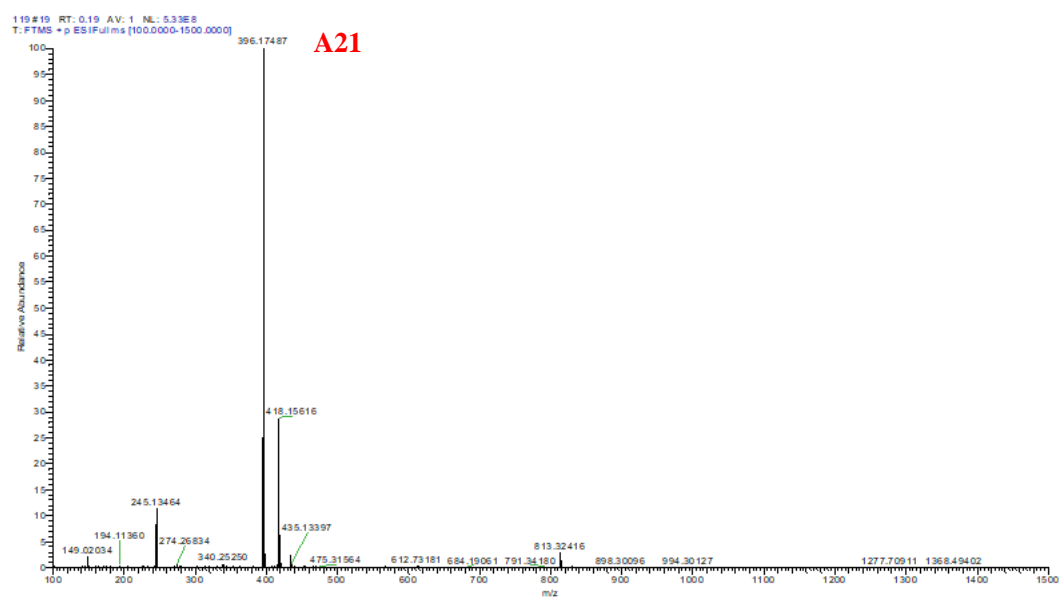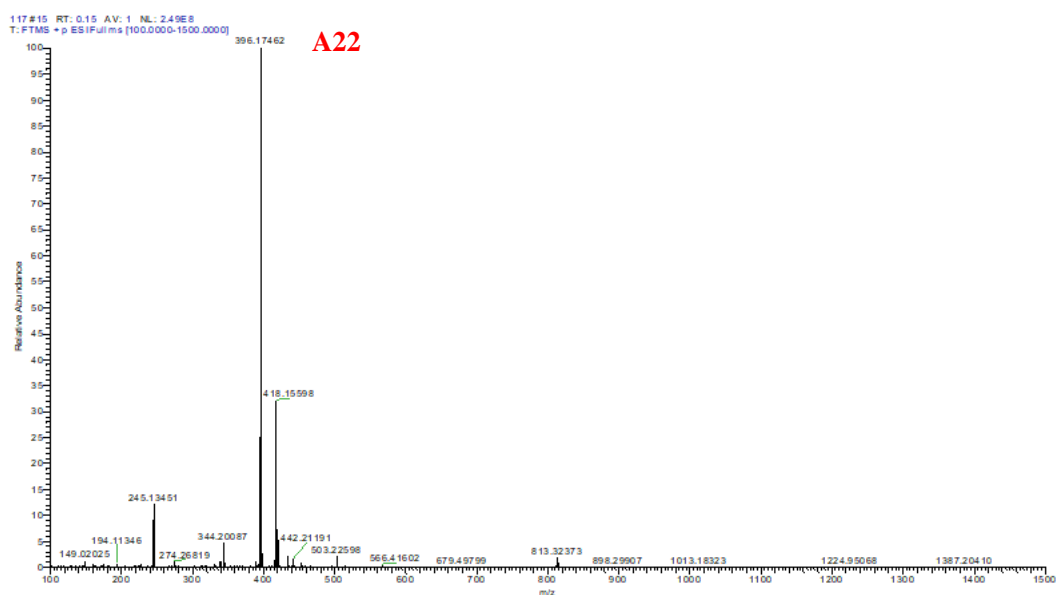

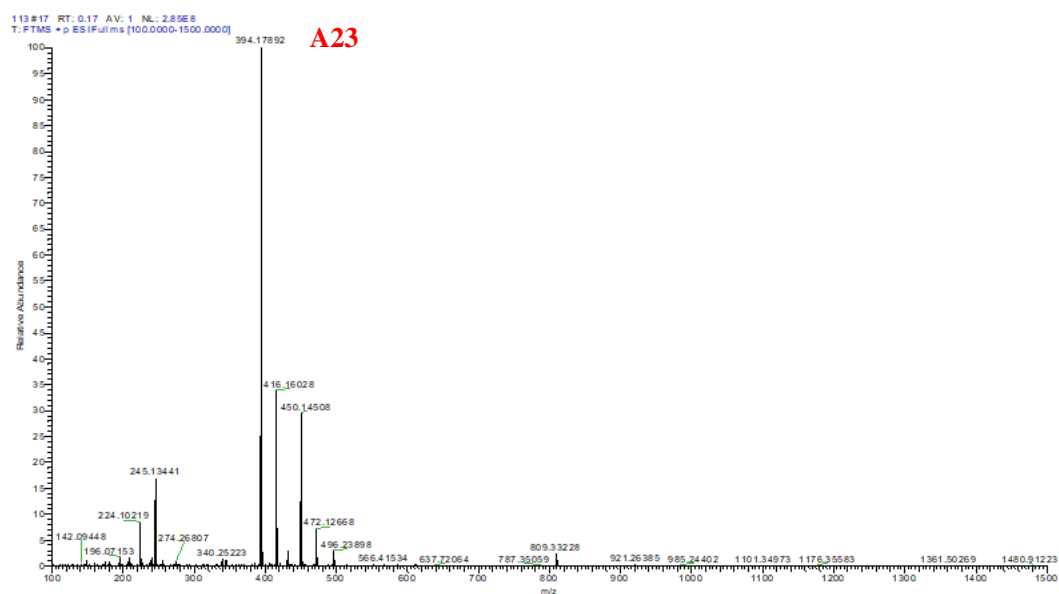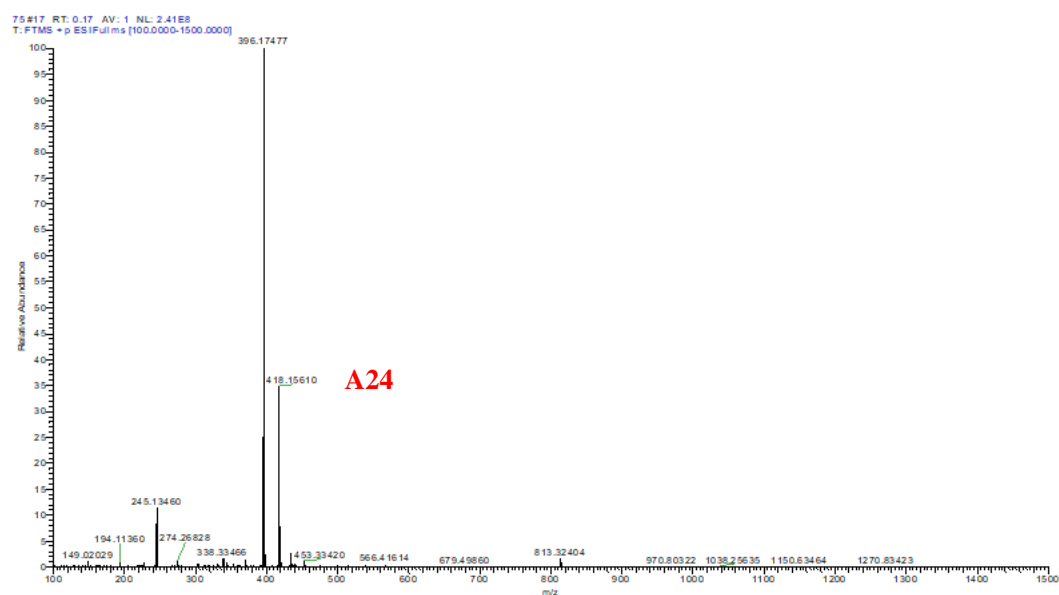

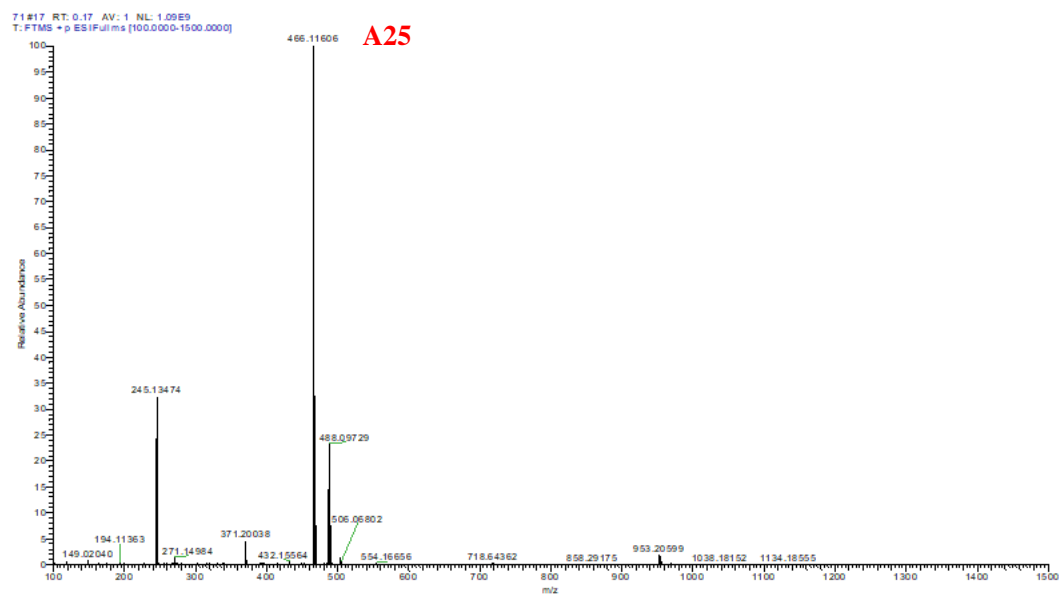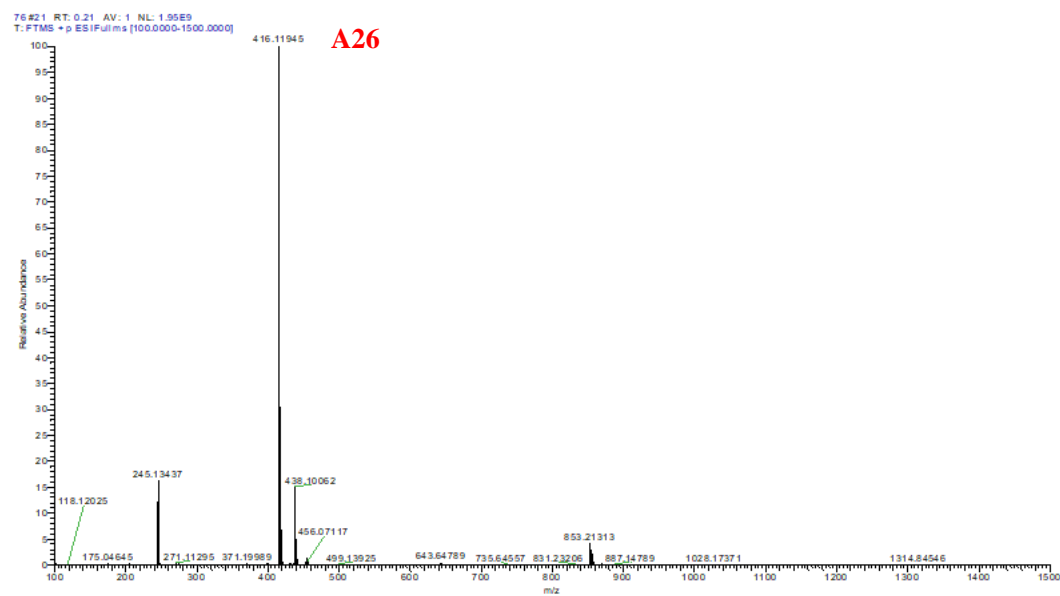

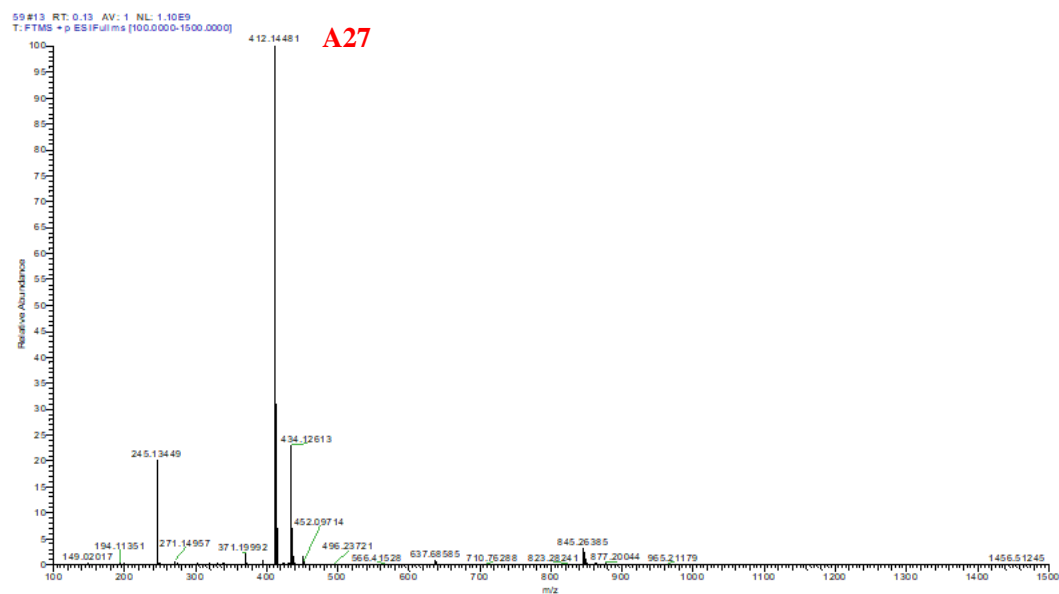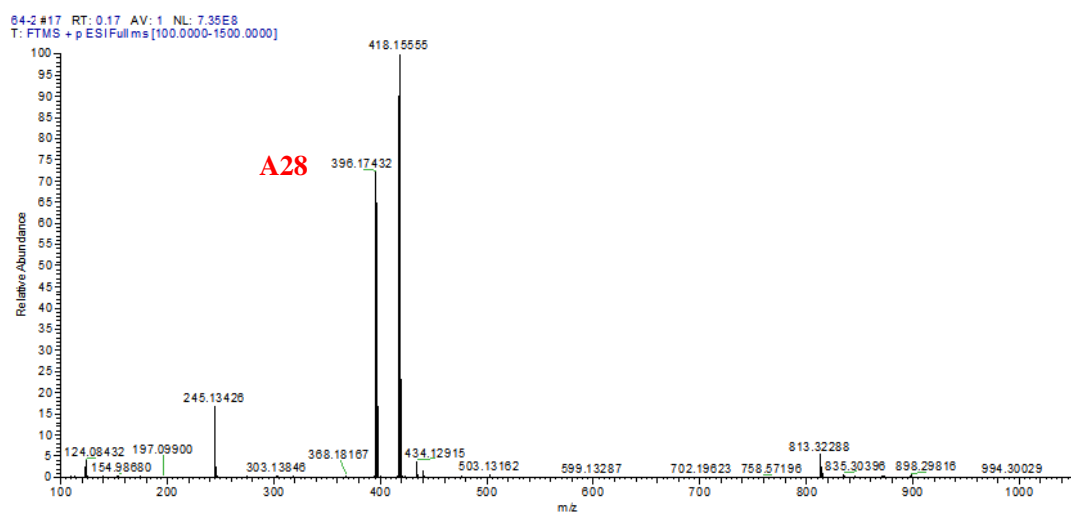

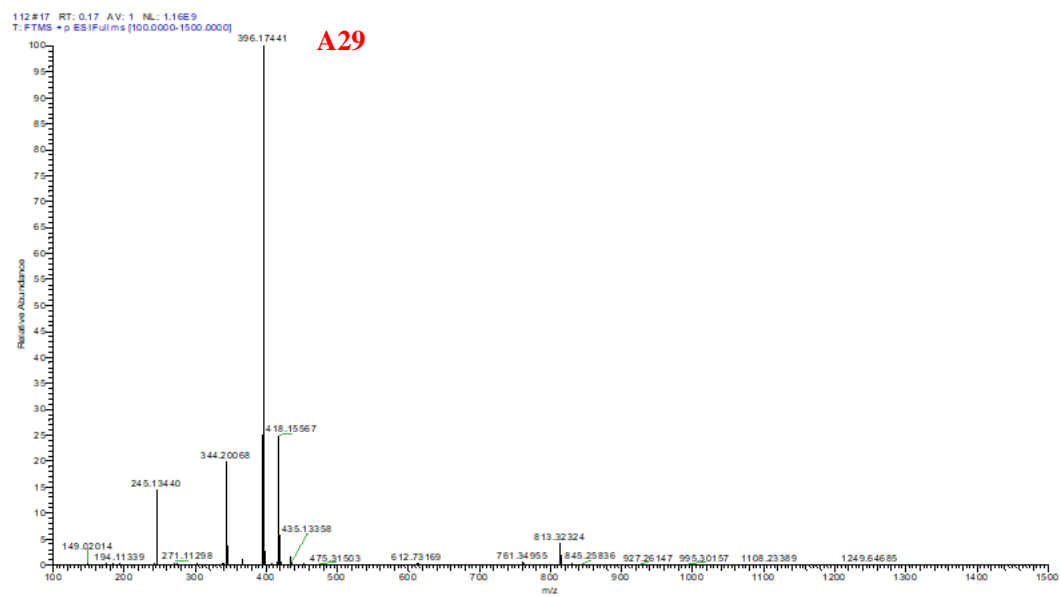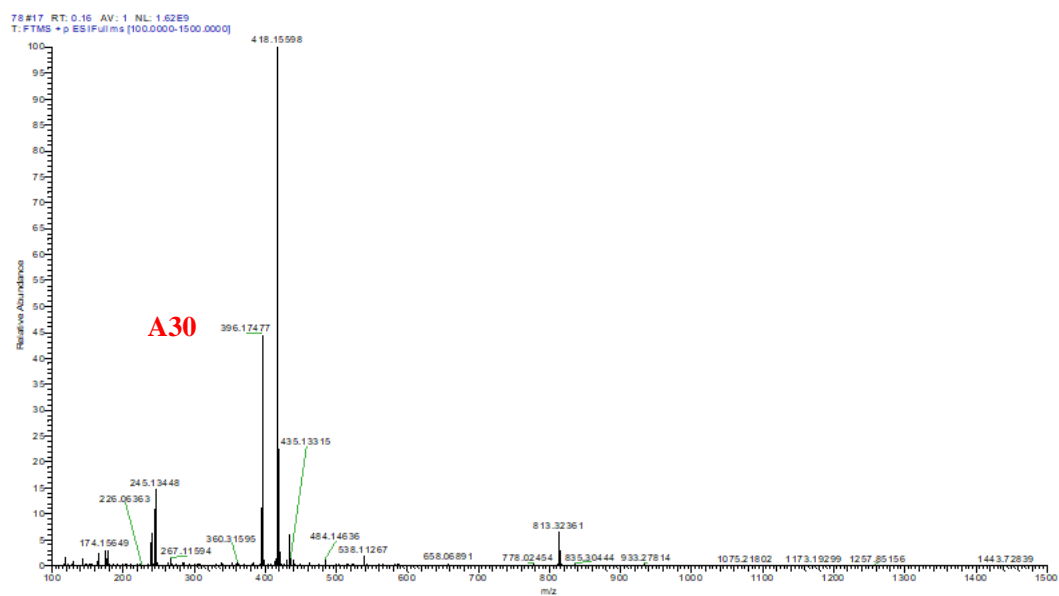

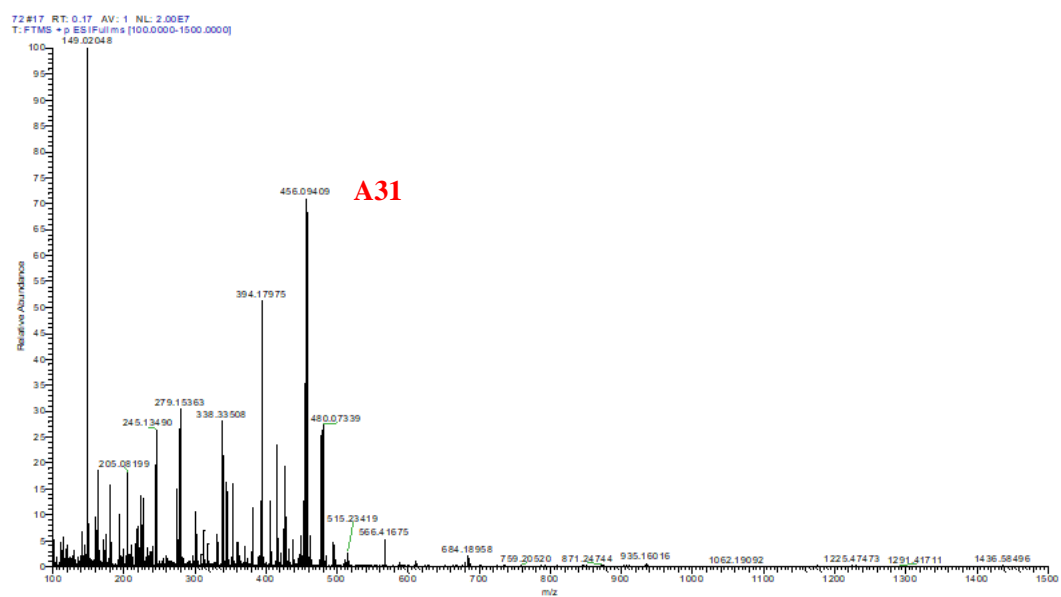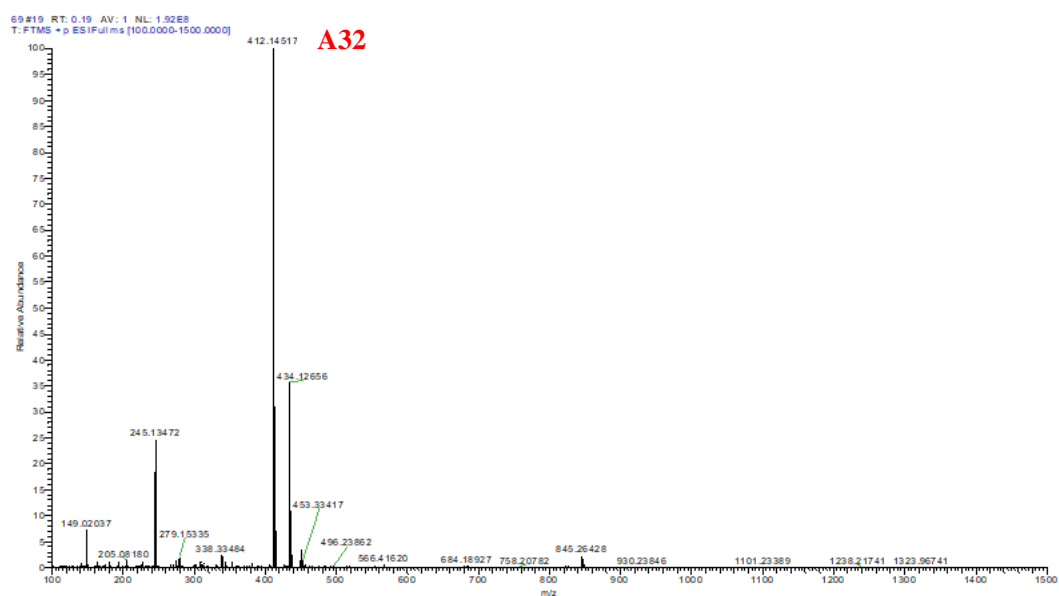

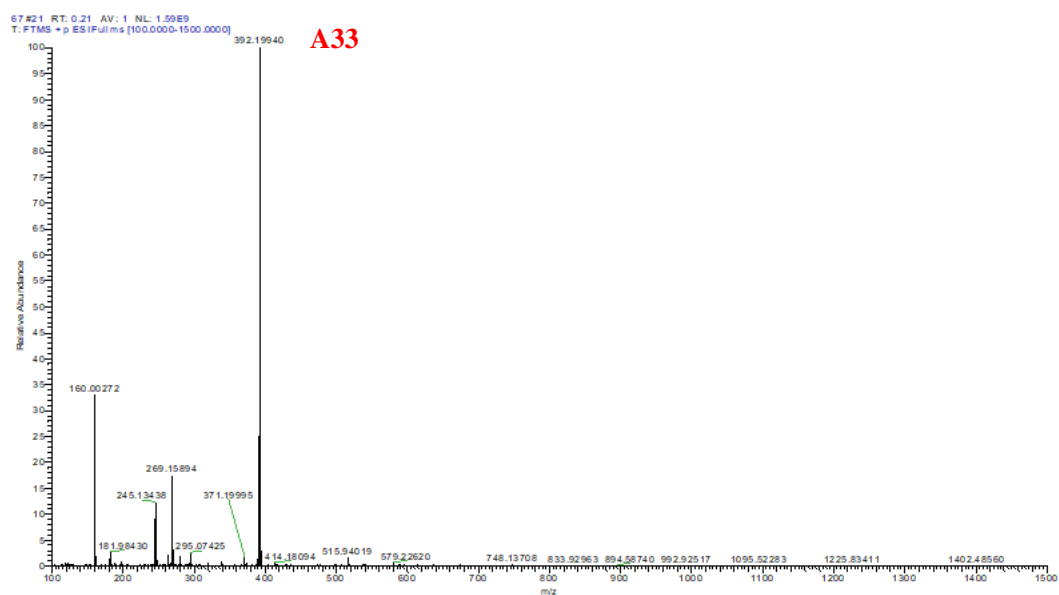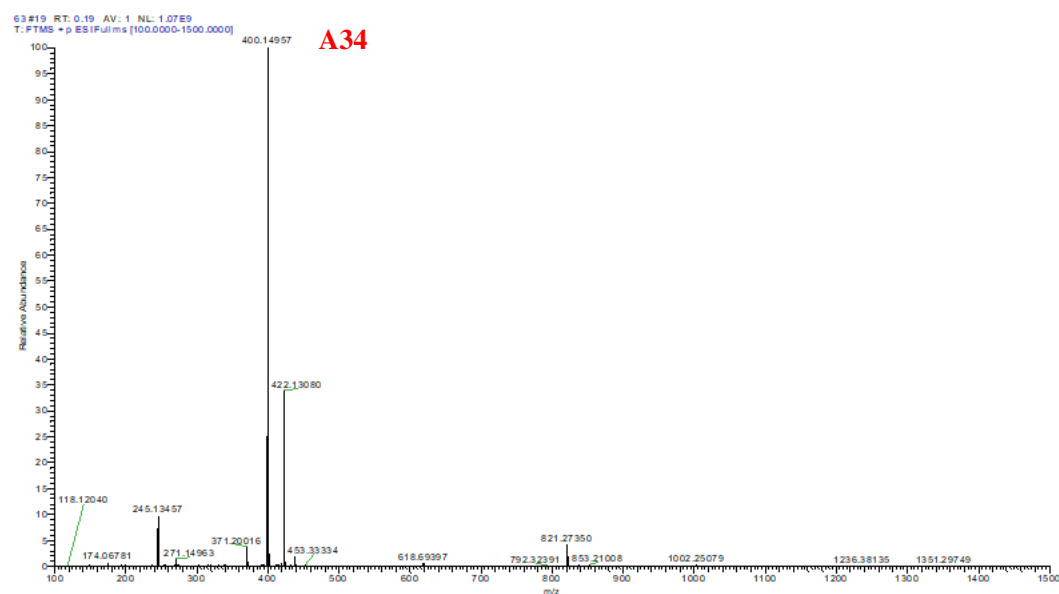

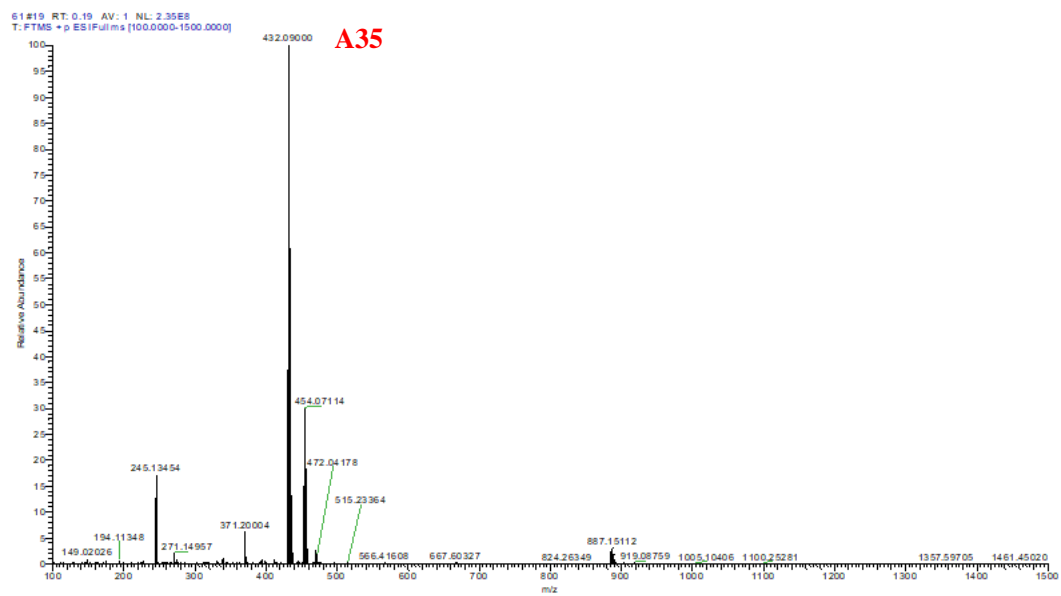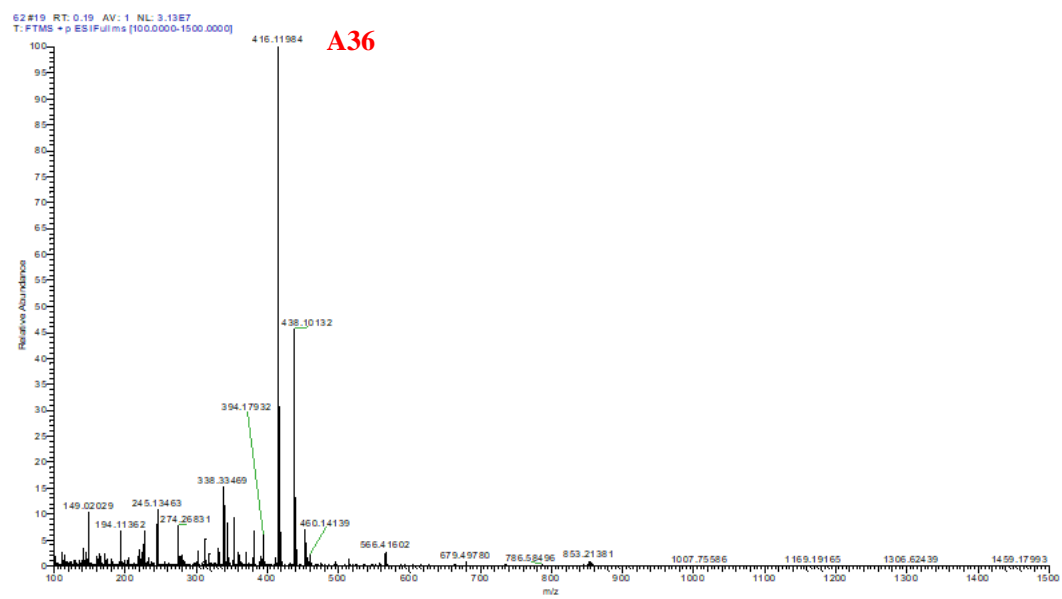

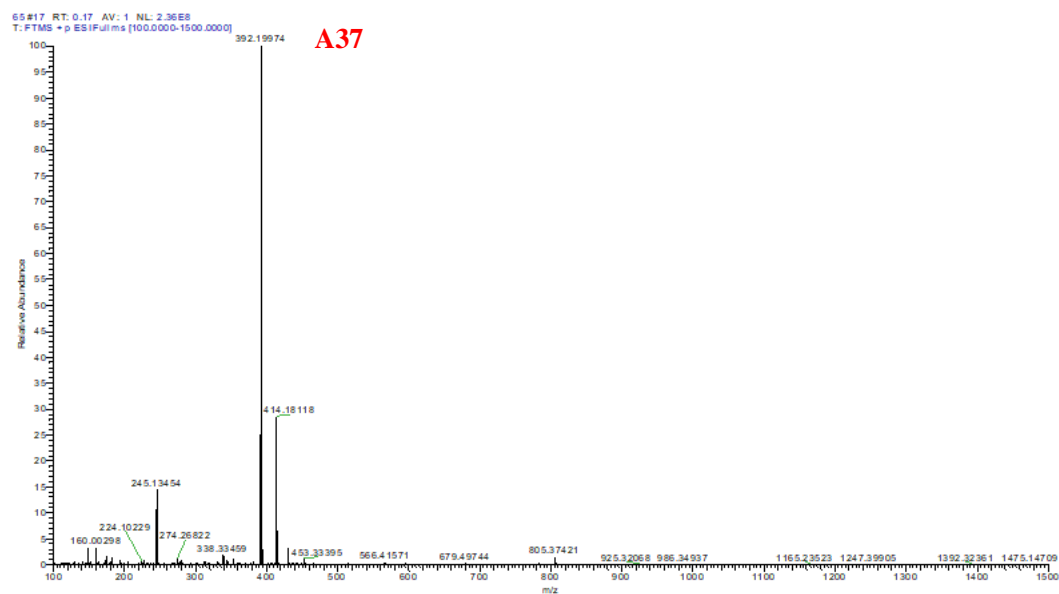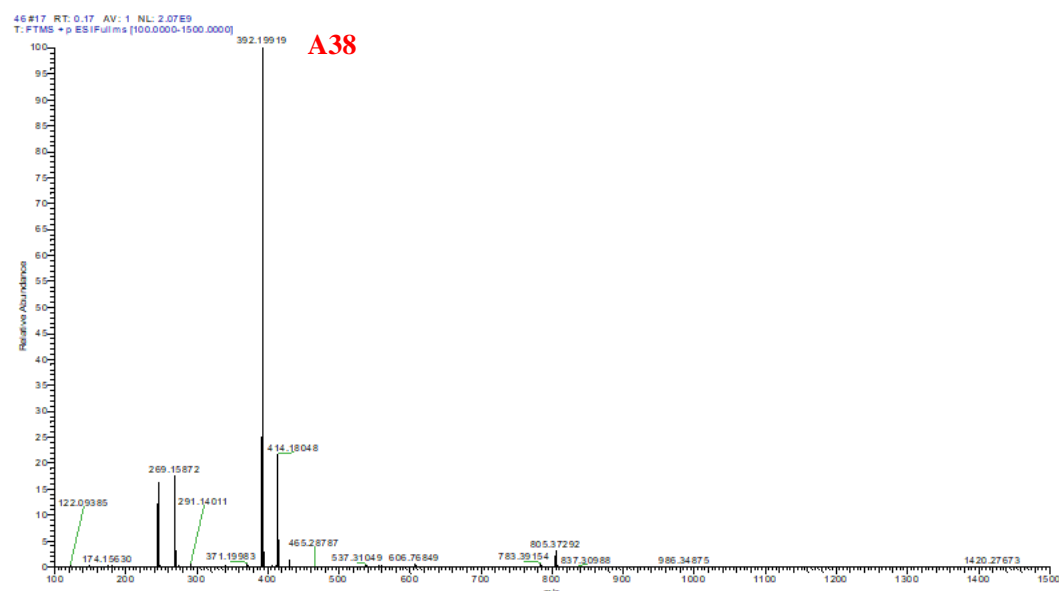

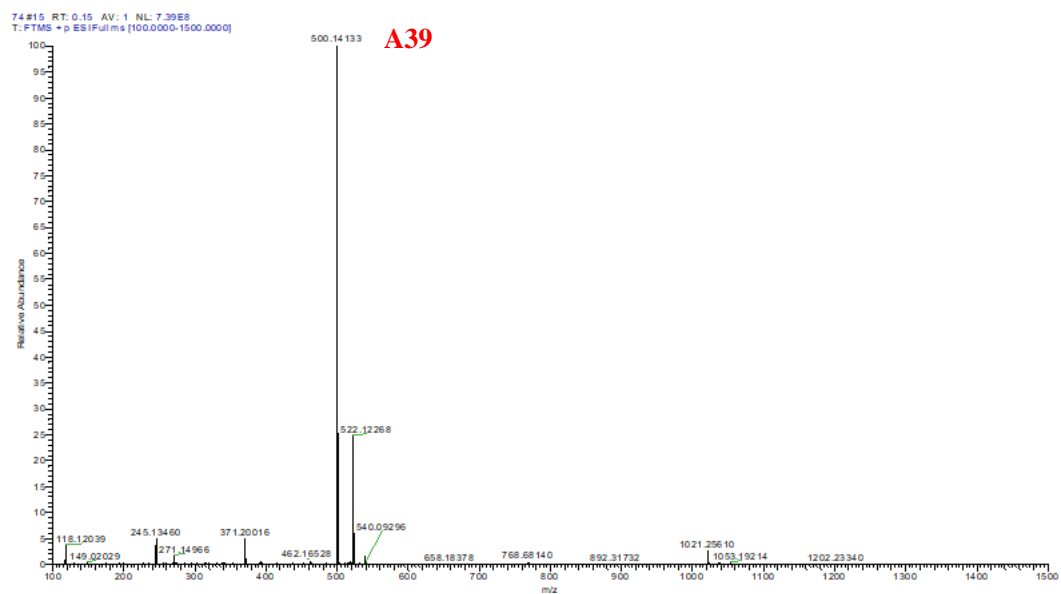

## 4.2 Mass spectrum of B1-B7

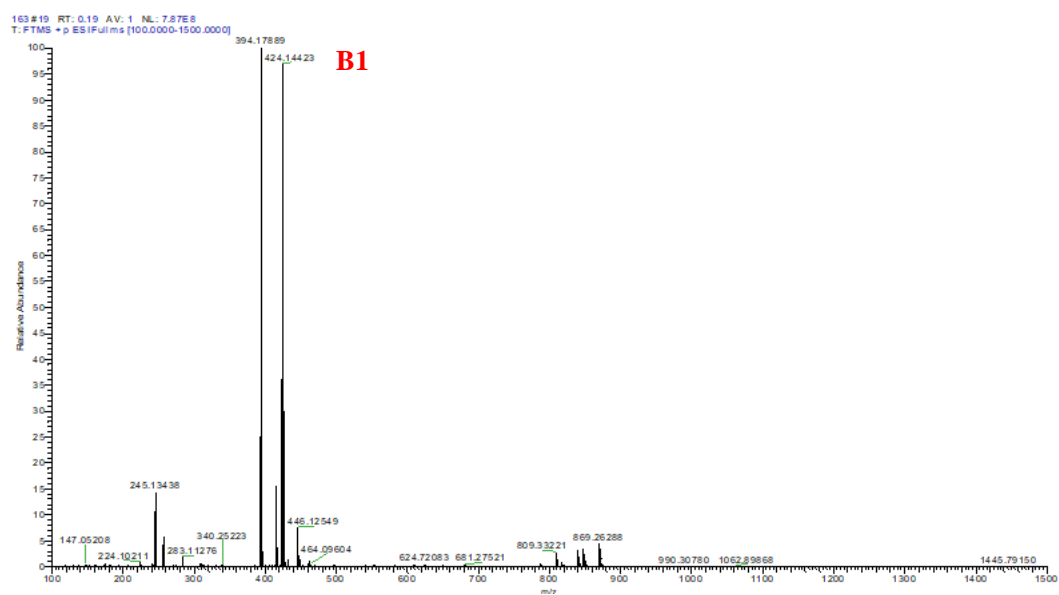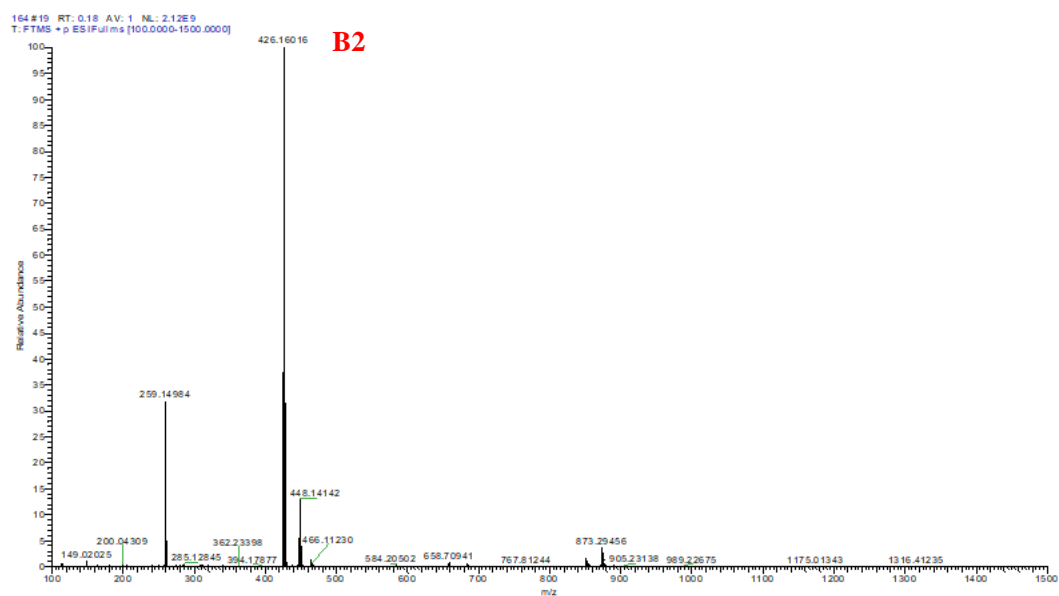

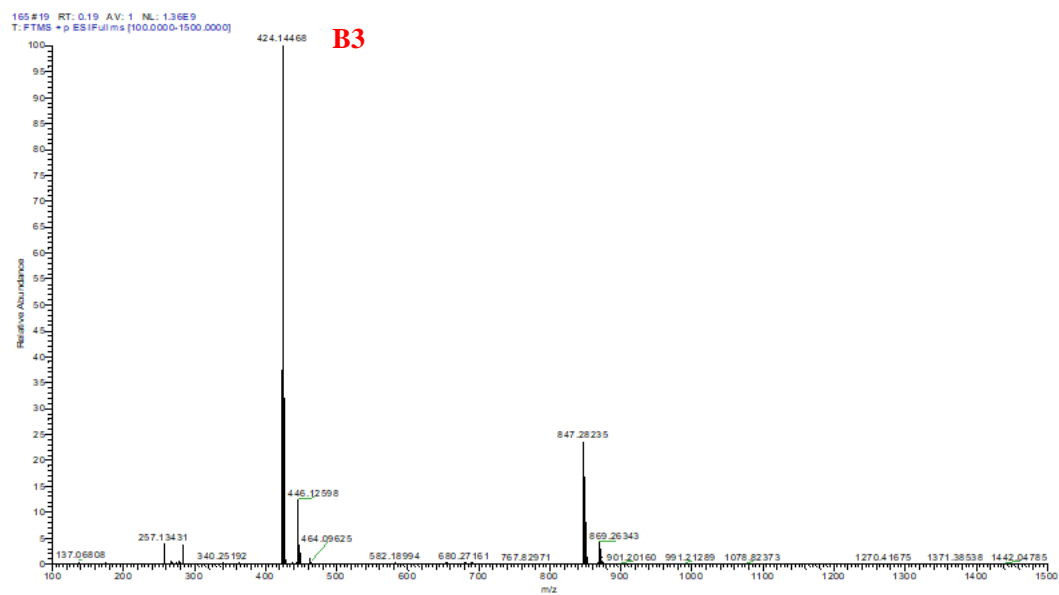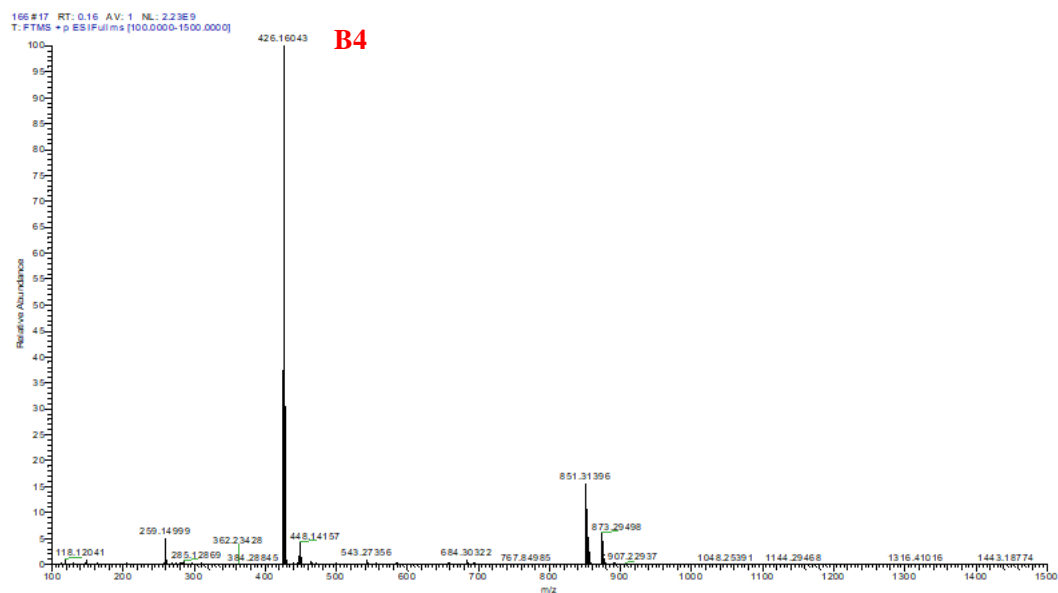

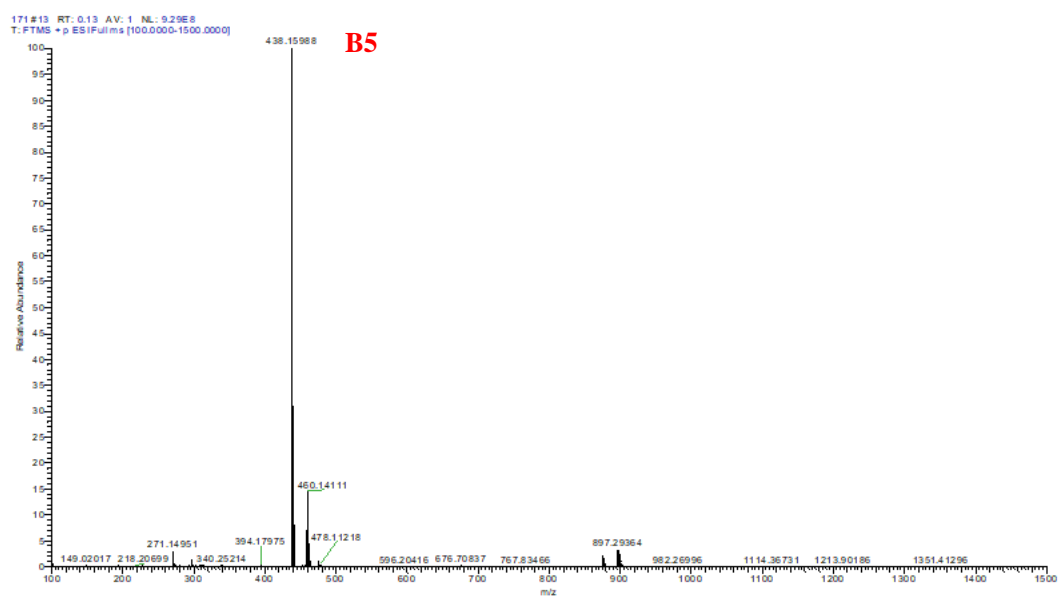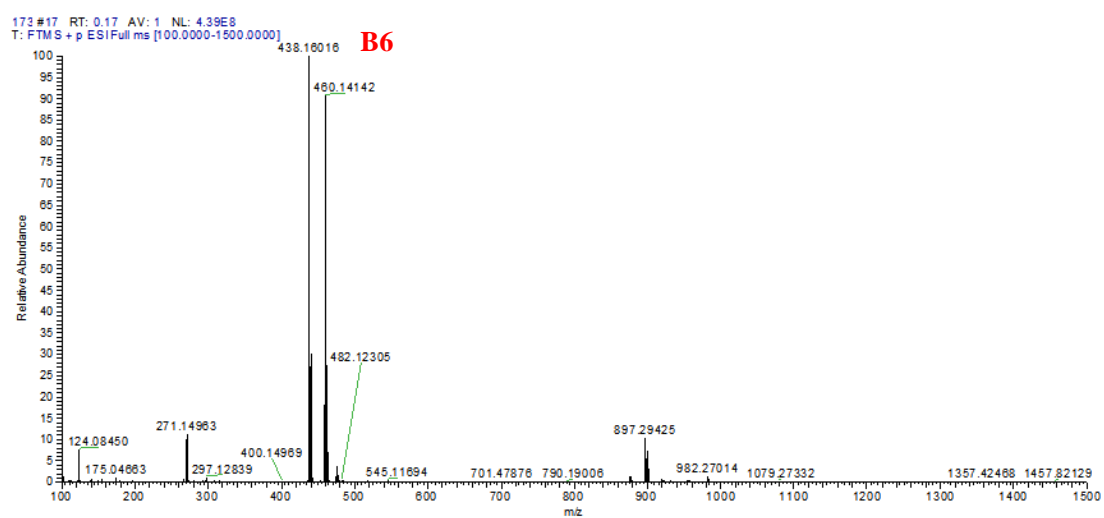

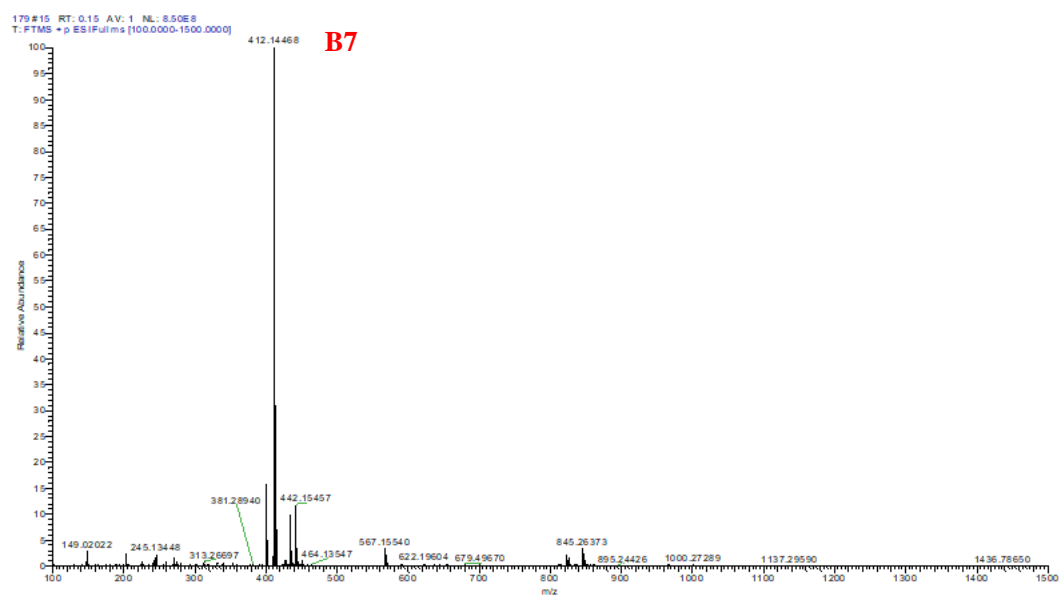

### 4.3 Mass spectrum of C1-C5

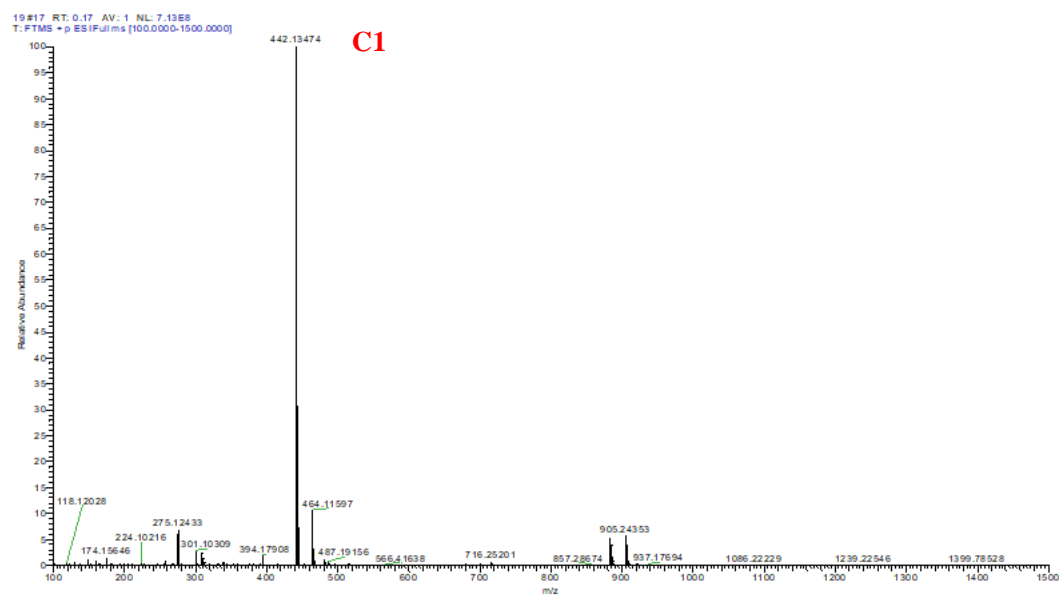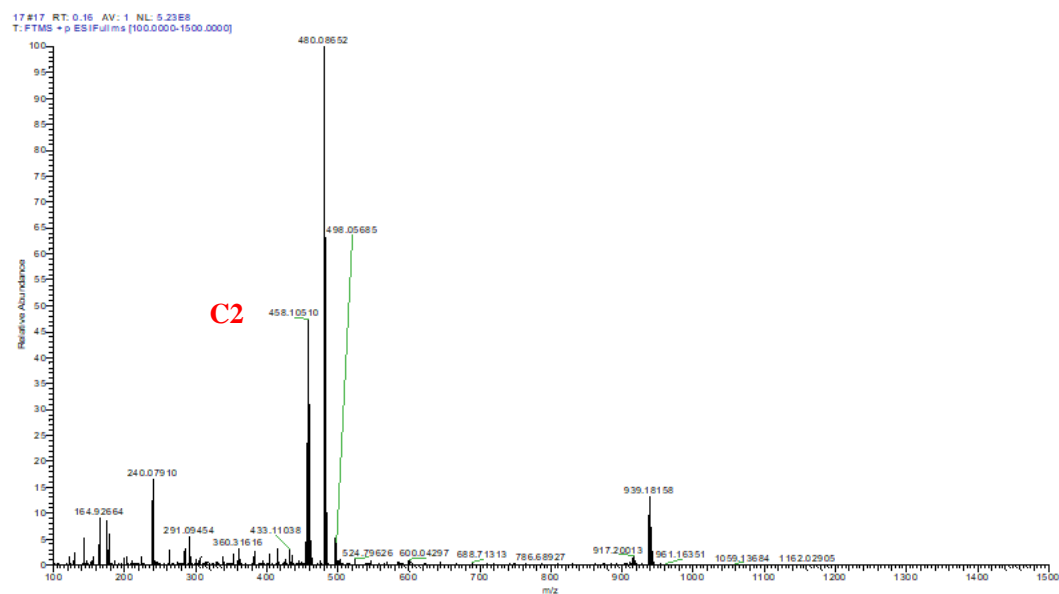

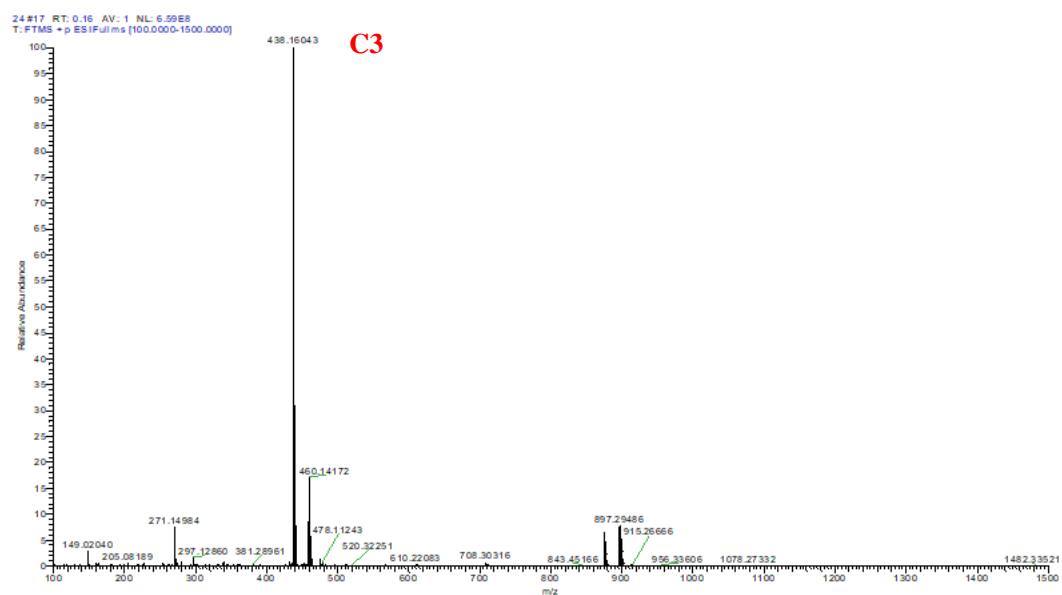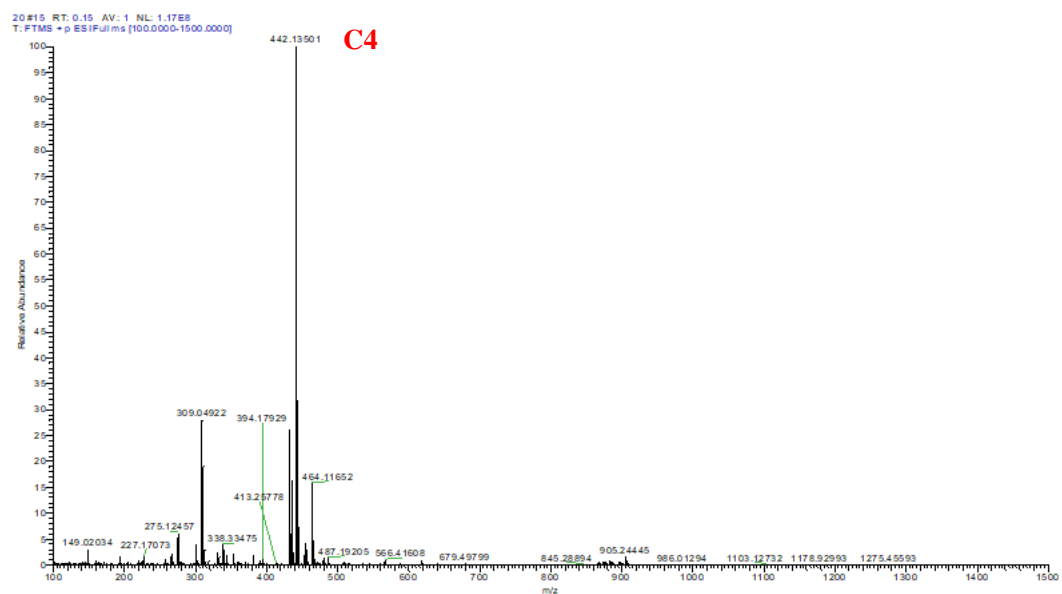

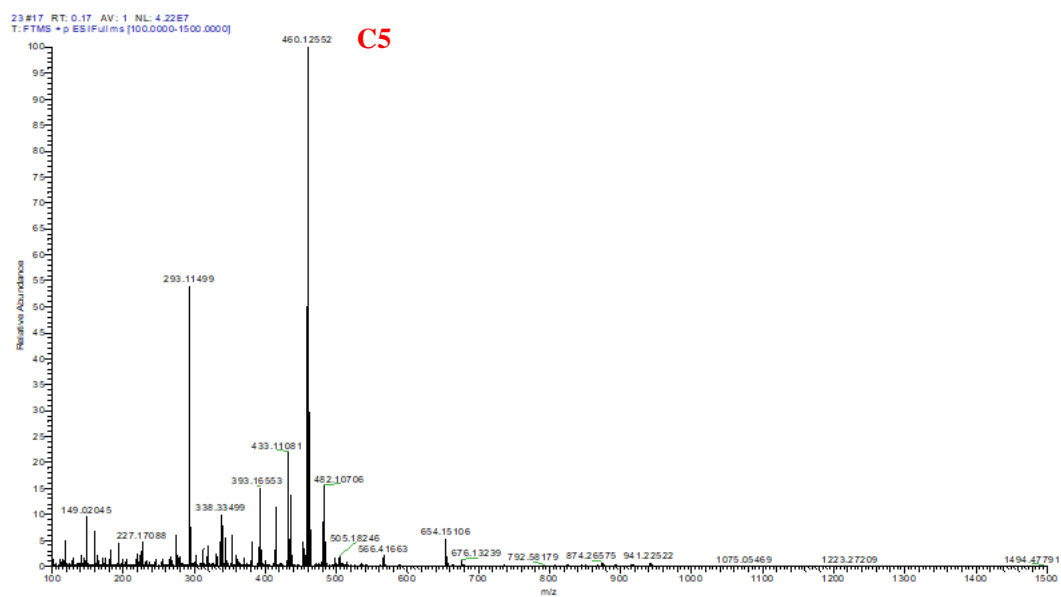

## S6: IR Spectral of compound B1

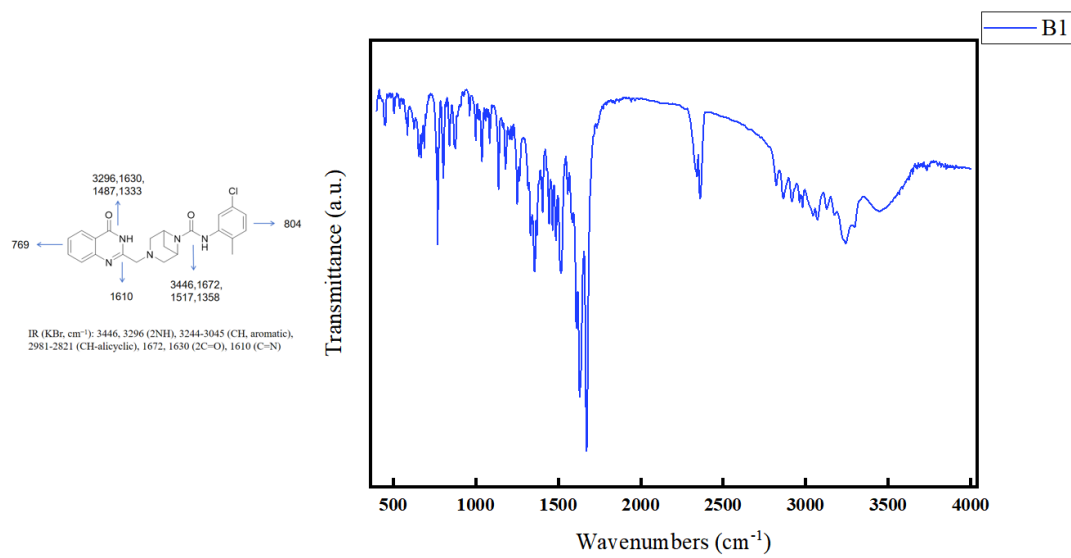

Supplement: s1 [file s1]
